# Supplementary material for: A Cas6 functions as an anti-CRISPR of type I-B CRISPR-Cas effector in Thermus thermophilus
Source: Research Square preprint supplement (doi:10.21203/rs.3.rs-5878367/v1), 2025-01-31
Supplement: Supplementary file 1 [file 581e4994d1d1b9a31881c7ee.xlsx]

## Sheet: Cascade-WT_MS
Accession	Protein ID	Gene	Fasta description	Mw (kDa)	Length	Score	Sequence coverage [%]	Unique sequence coverage [%]	peptides	Unique peptides	Peptide ID	Spectra count	Intensity	iBAQ	iBAQ [%]
							cascade-WT		cascade-WT	cascade-WT		cascade-WT	cascade-WT	cascade-WT	cascade-WT
Cas3b			type I-B CRISPR-associated protein Cas3	93.385	817	323.31	67.3	67.3	58	58	4;13;20;30;31;32;37;47;50;52;69;73;74;77;84;85;94;97;105;111;112;113;117;118;119;120;122;129;147;149;151;159;165;167;197;205;210;211;219;225;271;283;291;292;296;302;311;317;327;328;330;333;337;341;342;343;344;346;350;351;355;378;384	1274	2.61017e+11	1.07124e+10	30.14%
Q745V6 (Cas8b)	Q745V6_THET2	TT_P0199	Uncharacterized protein OS=Thermus thermophilus (strain ATCC BAA-163 / DSM 7039 / HB27) OX=262724 GN=TT_P0199 PE=4 SV=1	85.637	766	323.31	60.3	60.3	45	45	3;7;14;15;25;33;36;38;45;46;55;58;59;71;72;87;108;114;116;132;142;173;183;200;201;207;208;209;214;224;228;230;255;258;259;261;288;289;329;347;362;366;371;373;381;382	135	2.35034e+11	8.72556e+09	24.55%
Q745V5 (Cas7b)	Q745V5_THET2	TT_P0200	Uncharacterized protein OS=Thermus thermophilus (strain ATCC BAA-163 / DSM 7039 / HB27) OX=262724 GN=TT_P0200 PE=4 SV=1	32.765	293	323.31	67.2	67.2	22	22	0;11;28;29;35;42;60;61;86;89;90;133;134;135;189;222;239;279;280;281;282;293;357;358;359;364;365	359	2.199e+11	9.28357e+09	26.12%
Q745V3 (Cas6-1)	Q745V3_THET2	TT_P0204	Hypothetical conserved protein OS=Thermus thermophilus (strain ATCC BAA-163 / DSM 7039 / HB27) OX=262724 GN=TT_P0204 PE=4 SV=1	28.99	264	323.31	73.1	73.1	21	21	27;79;80;109;110;125;137;170;193;194;195;223;227;233;257;262;263;354;368;370;385	142	5.9269e+10	2.23666e+09	6.293%
Q72GC1 (Cas6-2)	Q72GC1_THET2	TT_C1927	Hypothetical conserved protein OS=Thermus thermophilus (strain ATCC BAA-163 / DSM 7039 / HB27) OX=262724 GN=TT_C1927 PE=4 SV=1	26.348	239	323.31	72.4	72.4	19	19	41;44;76;91;99;101;126;145;169;180;181;188;226;229;287;313;323;353;363	121	7.94605e+10	2.36815e+09	6.6629%
Q745V4 (Cas5b)	Q745V4_THET2	TT_P0201	CRISPR-associated protein Cas5 OS=Thermus thermophilus (strain ATCC BAA-163 / DSM 7039 / HB27) OX=262724 GN=TT_P0201 PE=4 SV=1	34.426	304	323.31	44.1	44.1	13	13	10;16;78;104;127;139;164;184;185;192;218;265;290;383	142	5.2176e+10	1.93242e+09	5.437%
Q72JF5	Q72JF5_THET2	TT_C0817	Two-component system histidine kinase OS=Thermus thermophilus (strain ATCC BAA-163 / DSM 7039 / HB27) OX=262724 GN=TT_C0817 PE=4 SV=1	56.51	515	132.21	31.3	31.3	10	10	1;56;70;88;121;136;146;204;336;338;352;360;372;379	10	246850000	8512100	0.0239%
Q72JR8	Q72JR8_THET2	rho	Transcription termination factor Rho OS=Thermus thermophilus (strain ATCC BAA-163 / DSM 7039 / HB27) OX=262724 GN=rho PE=3 SV=1	47.773	426	8.809	4.5	4.5	2	2	138;144	2	31977000	1184300	0.0033%
Q72HY6	Q72HY6_THET2	TT_C1346	SWIM-type domain-containing protein OS=Thermus thermophilus (strain ATCC BAA-163 / DSM 7039 / HB27) OX=262724 GN=TT_C1346 PE=4 SV=1	53.028	474	2.4417	7.6	7.6	1	1	82;335	5	1348600000	46502000	0.1308%
Q72IA1	Q72IA1_THET2	TT_C1231	Protein phosphatase 2C OS=Thermus thermophilus (strain ATCC BAA-163 / DSM 7039 / HB27) OX=262724 GN=TT_C1231 PE=4 SV=1	27.959	254	3.0533	12.2	12.2	2	2	26;57	2	170790000	12199000	0.0343%
Q72I12	RL29_THET2	rpmC	Large ribosomal subunit protein uL29 OS=Thermus thermophilus (strain ATCC BAA-163 / DSM 7039 / HB27) OX=262724 GN=rpmC PE=1 SV=1	8.65	72	2.5462	12.5	12.5	1	1	212;213	1	8244700	2748200	0.0077%
Q746C2	CAS5D_THET2	cas5d	CRISPR pre-crRNA endoribonuclease Cas5d OS=Thermus thermophilus (strain ATCC BAA-163 / DSM 7039 / HB27) OX=262724 GN=cas5d PE=1 SV=1	26.367	229	4.8077	16.2	16.2	2	2	63;124	2	51366000	4280500	0.012%
Q72ID7	Q72ID7_THET2	coaBC	Coenzyme A biosynthesis bifunctional protein CoaBC OS=Thermus thermophilus (strain ATCC BAA-163 / DSM 7039 / HB27) OX=262724 GN=coaBC PE=3 SV=1	43.22	396	3.1285	6.3	6.3	2	2	246;340	3	58086000	3057200	0.0086%
Q72L01	Q72L01_THET2	hslU	ATP-dependent hsl protease ATP-binding subunit hslU OS=Thermus thermophilus (strain ATCC BAA-163 / DSM 7039 / HB27) OX=262724 GN=hslU PE=4 SV=1	46.513	416	3.0291	2.6	2.6	1	1	264	1	0	0	0.0%
Q746N2	Q746N2_THET2	TT_P0021	Hypothetical conserved protein OS=Thermus thermophilus (strain ATCC BAA-163 / DSM 7039 / HB27) OX=262724 GN=TT_P0021 PE=4 SV=1	12.606	109	3.3252	6.4	6.4	1	1	182	1	79312000	19828000	0.0558%
Q72GM9	Q72GM9_THET2	TT_C1819	Transcriptional regulator OS=Thermus thermophilus (strain ATCC BAA-163 / DSM 7039 / HB27) OX=262724 GN=TT_C1819 PE=4 SV=1	21.539	189	16.071	3.7	3.7	1	1	202	5	1332200000	121110000	0.3408%
Q72J74	VATD_THET2	atpD	V-type ATP synthase subunit D OS=Thermus thermophilus (strain ATCC BAA-163 / DSM 7039 / HB27) OX=262724 GN=atpD PE=3 SV=1	24.678	223	3.4255	4.5	4.5	1	1	179	7	0	0	0.0%
Q72L14	CLPX_THET2	clpX	ATP-dependent Clp protease ATP-binding subunit ClpX OS=Thermus thermophilus (strain ATCC BAA-163 / DSM 7039 / HB27) OX=262724 GN=clpX PE=3 SV=1	44.435	399	7.6701	3.3	3.3	1	1	66	1	15040000	601610	0.0017%
Q72IK5	DNAK_THET2	dnaK	Chaperone protein DnaK OS=Thermus thermophilus (strain ATCC BAA-163 / DSM 7039 / HB27) OX=262724 GN=dnaK PE=3 SV=1	66.81	615	9.5121	2.6	2.6	1	1	156	1	433050000	11396000	0.0321%
Q72I01	EFG_THET2	fusA	Elongation factor G OS=Thermus thermophilus (strain ATCC BAA-163 / DSM 7039 / HB27) OX=262724 GN=fusA PE=1 SV=1	76.911	691	27.156	2.6	2.6	1	1	161	1	98984000	2538100	0.0071%
Q72HM6	RPOC_THET2	rpoC	DNA-directed RNA polymerase subunit beta' OS=Thermus thermophilus (strain ATCC BAA-163 / DSM 7039 / HB27) OX=262724 GN=rpoC PE=3 SV=2	170.718	1524	5.0613	0.7	0.7	1	1	102	1	0	0	0.0%
Q72H87	DNAA_THET2	dnaA	Chromosomal replication initiator protein DnaA OS=Thermus thermophilus (strain ATCC BAA-163 / DSM 7039 / HB27) OX=262724 GN=dnaA PE=3 SV=2	49.36	436	3.2352	4.6	4.6	1	1	285	1	0	0	0.0%
Q72GW4	EFTU_THET2	tuf1	Elongation factor Tu OS=Thermus thermophilus (strain ATCC BAA-163 / DSM 7039 / HB27) OX=262724 GN=tuf1 PE=3 SV=1	44.782	406	4.632	4.2	4.2	1	1	315	1	3883000	168830	0.0005%
P62655	RS13_THET2	rpsM	Small ribosomal subunit protein uS13 OS=Thermus thermophilus (strain ATCC BAA-163 / DSM 7039 / HB27) OX=262724 GN=rpsM PE=1 SV=2	14.305	126	3.1346	6.3	6.3	1	1	215	2	46621000	6660200	0.0187%
P62442	RL11_THET2	rplK	Large ribosomal subunit protein uL11 OS=Thermus thermophilus (strain ATCC BAA-163 / DSM 7039 / HB27) OX=262724 GN=rplK PE=1 SV=1	15.505	147	3.6596	4.8	4.8	1	1	295	1	14041000	1560100	0.0044%
Q72GF8	Q72GF8_THET2	TT_C1890	ABC transporter ATP-binding protein OS=Thermus thermophilus (strain ATCC BAA-163 / DSM 7039 / HB27) OX=262724 GN=TT_C1890 PE=3 SV=1	64.953	578	2.6536	1.4	1.4	1	1	178		254560000	7071000	0.0199%
Q72KW0	Q72KW0_THET2	TT_C0404	Putative beta-lactamase OS=Thermus thermophilus (strain ATCC BAA-163 / DSM 7039 / HB27) OX=262724 GN=TT_C0404 PE=4 SV=1	43.169	397	3.0864	1.8	1.8	1	1	266	1	452670000	19681000	0.0554%
Q72J40	Q72J40_THET2	TT_C0941	Uncharacterized protein OS=Thermus thermophilus (strain ATCC BAA-163 / DSM 7039 / HB27) OX=262724 GN=TT_C0941 PE=4 SV=1	11.969	110	2.41	7.3	7.3	1	1	203	1	50800000	8466700	0.0238%
Q72KK5	Q72KK5_THET2	TT_C0443	(S)-2-hydroxy-acid oxidase chain D OS=Thermus thermophilus (strain ATCC BAA-163 / DSM 7039 / HB27) OX=262724 GN=TT_C0443 PE=4 SV=1	48.32	451	4.1645	3.8	3.8	1	1	53	1	137310000	5721300	0.0161%

## Sheet: Cascade-delta6-1_MS
Accession	Protein ID	Gene	Fasta description	Mw (kDa)	Length	Score	Sequence coverage [%]	Unique sequence coverage [%]	Peptides	Unique peptides	Peptide ID	Spectra count	Intensity	iBAQ	iBAQ [%]
							cascade-D1		cascade-D1	cascade-D1		cascade-D1	cascade-D1	cascade-D1	cascade-D1
Cas3b			type I-B CRISPR-associated protein Cas3	93.385	817	323.31	67.3	67.3	63	63	4;13;20;30;31;32;37;47;50;52;69;73;74;77;84;85;94;97;105;111;112;113;117;118;119;120;122;129;147;149;151;159;165;167;197;205;210;211;219;225;271;283;291;292;296;302;311;317;327;328;330;333;337;341;342;343;344;346;350;351;355;378;384	1360	2.20431e+11	8.65356e+09	26.732%
Q745V6 (Cas8b)	Q745V6_THET2	TT_P0199	Uncharacterized protein OS=Thermus thermophilus (strain ATCC BAA-163 / DSM 7039 / HB27) OX=262724 GN=TT_P0199 PE=4 SV=1	85.637	766	323.31	60.3	60.3	44	44	3;7;14;15;25;33;36;38;45;46;55;58;59;71;72;87;108;114;116;132;142;173;183;200;201;207;208;209;214;224;228;230;255;258;259;261;288;289;329;347;362;366;371;373;381;382	129	1.9255e+11	7.68112e+09	23.728%
Q745V5 (Cas7b)	Q745V5_THET2	TT_P0200	Uncharacterized protein OS=Thermus thermophilus (strain ATCC BAA-163 / DSM 7039 / HB27) OX=262724 GN=TT_P0200 PE=4 SV=1	32.765	293	323.31	67.2	67.2	26	26	0;11;28;29;35;42;60;61;86;89;90;133;134;135;189;222;239;279;280;281;282;293;357;358;359;364;365	367	2.27377e+11	7.88189e+09	24.3482%
Q72GC1 (Cas6-2)	Q72GC1_THET2	TT_C1927	Hypothetical conserved protein OS=Thermus thermophilus (strain ATCC BAA-163 / DSM 7039 / HB27) OX=262724 GN=TT_C1927 PE=4 SV=1	26.348	239	323.31	72.4	72.4	18	18	41;44;76;91;99;101;126;145;169;180;181;188;226;229;287;313;323;353;363	98	1.01535e+11	2.6292e+09	8.1219%
Q745V4 (Cas5b)	Q745V4_THET2	TT_P0201	CRISPR-associated protein Cas5 OS=Thermus thermophilus (strain ATCC BAA-163 / DSM 7039 / HB27) OX=262724 GN=TT_P0201 PE=4 SV=1	34.426	304	323.31	44.1	44.1	13	13	10;16;78;104;127;139;164;184;185;192;218;265;290;383	149	1.23887e+11	5.26824e+09	16.2743%
Q72JF5	Q72JF5_THET2	TT_C0817	Two-component system histidine kinase OS=Thermus thermophilus (strain ATCC BAA-163 / DSM 7039 / HB27) OX=262724 GN=TT_C0817 PE=4 SV=1	56.51	515	132.21	31.3	31.3	11	11	1;56;70;88;121;136;146;204;336;338;352;360;372;379	11	225910000	7790100	0.0241%
Q746C3	Q746C3_THET2	TT_P0132	Hypothetical conserved protein OS=Thermus thermophilus (strain ATCC BAA-163 / DSM 7039 / HB27) OX=262724 GN=TT_P0132 PE=3 SV=1	88.08	786	69.867	18.1	18.1	9	9	19;51;95;131;196;206;308;356;361	9	126240000	3078900	0.0095%
Q746E7	Q746E7_THET2	TT_P0108	Uncharacterized protein OS=Thermus thermophilus (strain ATCC BAA-163 / DSM 7039 / HB27) OX=262724 GN=TT_P0108 PE=4 SV=1	16.127	152	2.8957	12.5	12.5	2	2	43;286	2	9714700	1079400	0.0033%
Q72IA1	Q72IA1_THET2	TT_C1231	Protein phosphatase 2C OS=Thermus thermophilus (strain ATCC BAA-163 / DSM 7039 / HB27) OX=262724 GN=TT_C1231 PE=4 SV=1	27.959	254	3.0533	12.2	12.2	1	1	26;57	1	0	0	0.0%
Q72HY6	Q72HY6_THET2	TT_C1346	SWIM-type domain-containing protein OS=Thermus thermophilus (strain ATCC BAA-163 / DSM 7039 / HB27) OX=262724 GN=TT_C1346 PE=4 SV=1	53.028	474	2.4417	7.6	7.6	2	2	82;335	9	1776200000	61249000	0.1892%
Q72I12	RL29_THET2	rpmC	Large ribosomal subunit protein uL29 OS=Thermus thermophilus (strain ATCC BAA-163 / DSM 7039 / HB27) OX=262724 GN=rpmC PE=1 SV=1	8.65	72	2.5462	12.5	12.5	1	1	212;213	1	22822000	7607300	0.0235%
Q72ID7	Q72ID7_THET2	coaBC	Coenzyme A biosynthesis bifunctional protein CoaBC OS=Thermus thermophilus (strain ATCC BAA-163 / DSM 7039 / HB27) OX=262724 GN=coaBC PE=3 SV=1	43.22	396	3.1285	6.3	6.3	2	2	246;340	2	51805000	2726600	0.0084%
Q72JR8	Q72JR8_THET2	rho	Transcription termination factor Rho OS=Thermus thermophilus (strain ATCC BAA-163 / DSM 7039 / HB27) OX=262724 GN=rho PE=3 SV=1	47.773	426	8.809	4.5	4.5	1	1	138;144	2	25555000	946470	0.0029%
Q72L01	Q72L01_THET2	hslU	ATP-dependent hsl protease ATP-binding subunit hslU OS=Thermus thermophilus (strain ATCC BAA-163 / DSM 7039 / HB27) OX=262724 GN=hslU PE=4 SV=1	46.513	416	3.0291	2.6	2.6	1	1	264	2	0	0	0.0%
Q72GM9	Q72GM9_THET2	TT_C1819	Transcriptional regulator OS=Thermus thermophilus (strain ATCC BAA-163 / DSM 7039 / HB27) OX=262724 GN=TT_C1819 PE=4 SV=1	21.539	189	16.071	3.7	3.7	1	1	202	7	1088100000	98922000	0.3056%
Q72J74	VATD_THET2	atpD	V-type ATP synthase subunit D OS=Thermus thermophilus (strain ATCC BAA-163 / DSM 7039 / HB27) OX=262724 GN=atpD PE=3 SV=1	24.678	223	3.4255	4.5	4.5	1	1	179	5	0	0	0.0%
Q72L14	CLPX_THET2	clpX	ATP-dependent Clp protease ATP-binding subunit ClpX OS=Thermus thermophilus (strain ATCC BAA-163 / DSM 7039 / HB27) OX=262724 GN=clpX PE=3 SV=1	44.435	399	7.6701	3.3	3.3	1	1	66	1	17454000	698180	0.0022%
Q746N2	Q746N2_THET2	TT_P0021	Hypothetical conserved protein OS=Thermus thermophilus (strain ATCC BAA-163 / DSM 7039 / HB27) OX=262724 GN=TT_P0021 PE=4 SV=1	12.606	109	3.3252	6.4	6.4	1	1	182	1	38501000	9625200	0.0297%
Q72I01	EFG_THET2	fusA	Elongation factor G OS=Thermus thermophilus (strain ATCC BAA-163 / DSM 7039 / HB27) OX=262724 GN=fusA PE=1 SV=1	76.911	691	27.156	2.6	2.6	1	1	161	2	133530000	3423800	0.0106%
Q72HM6	RPOC_THET2	rpoC	DNA-directed RNA polymerase subunit beta' OS=Thermus thermophilus (strain ATCC BAA-163 / DSM 7039 / HB27) OX=262724 GN=rpoC PE=3 SV=2	170.718	1524	5.0613	0.7	0.7	1	1	102	1	0	0	0.0%
Q72H87	DNAA_THET2	dnaA	Chromosomal replication initiator protein DnaA OS=Thermus thermophilus (strain ATCC BAA-163 / DSM 7039 / HB27) OX=262724 GN=dnaA PE=3 SV=2	49.36	436	3.2352	4.6	4.6	1	1	285	1	0	0	0.0%
Q72GW4	EFTU_THET2	tuf1	Elongation factor Tu OS=Thermus thermophilus (strain ATCC BAA-163 / DSM 7039 / HB27) OX=262724 GN=tuf1 PE=3 SV=1	44.782	406	4.632	4.2	4.2	1	1	315	1	8914000	387570	0.0012%
P62655	RS13_THET2	rpsM	Small ribosomal subunit protein uS13 OS=Thermus thermophilus (strain ATCC BAA-163 / DSM 7039 / HB27) OX=262724 GN=rpsM PE=1 SV=2	14.305	126	3.1346	6.3	6.3	1	1	215	2	40117000	5731000	0.0177%
P62442	RL11_THET2	rplK	Large ribosomal subunit protein uL11 OS=Thermus thermophilus (strain ATCC BAA-163 / DSM 7039 / HB27) OX=262724 GN=rplK PE=1 SV=1	15.505	147	3.6596	4.8	4.8	1	1	295	2	51027000	5669700	0.0175%
Q72GF8	Q72GF8_THET2	TT_C1890	ABC transporter ATP-binding protein OS=Thermus thermophilus (strain ATCC BAA-163 / DSM 7039 / HB27) OX=262724 GN=TT_C1890 PE=3 SV=1	64.953	578	2.6536	1.4	1.4	1	1	178		265850000	7384600	0.0228%
Q72IK5	DNAK_THET2	dnaK	Chaperone protein DnaK OS=Thermus thermophilus (strain ATCC BAA-163 / DSM 7039 / HB27) OX=262724 GN=dnaK PE=3 SV=1	66.81	615	9.5121	2.6	2.6	1	1	156	1	234930000	6182400	0.0191%
Q72J40	Q72J40_THET2	TT_C0941	Uncharacterized protein OS=Thermus thermophilus (strain ATCC BAA-163 / DSM 7039 / HB27) OX=262724 GN=TT_C0941 PE=4 SV=1	11.969	110	2.41	7.3	7.3	1	1	203	2	78902000	13150000	0.0406%
Q72KW0	Q72KW0_THET2	TT_C0404	Putative beta-lactamase OS=Thermus thermophilus (strain ATCC BAA-163 / DSM 7039 / HB27) OX=262724 GN=TT_C0404 PE=4 SV=1	43.169	397	3.0864	1.8	1.8	1	1	266	1	503340000	21884000	0.0676%
