# Supplementary material for: A Cas6 functions as an anti-CRISPR of type I-B CRISPR-Cas effector in Thermus thermophilus
Source: Research Square preprint supplement (doi:10.21203/rs.3.rs-5878367/v1), 2025-01-31
Supplement: Supplementary file 2 [file a0e16d4e8751b72a10dc345d.xlsx]

## Sheet: gene_expressions
Gene ID	Pos.	Count (C1)	TPM (C1)	FPKM (C1)	Count (C2)	TPM (C2)	FPKM (C2)	Count (C3)	TPM (C3)	FPKM (C3)
assembly_00973_gene	gnl.Prokka.assembly_1[+]906151-907146	12159	2460.78	2616.66	9274	2720.44	2951.32	9351	3126.65	3319.99
assembly_02324_gene	gnl.Prokka.assembly_2[+]195757-196149	1118	573.44	609.76	508	377.66	409.71	506	428.79	455.3
assembly_02168_gene	gnl.Prokka.assembly_2[-]77399-78178	39	10.08	10.72	78	29.22	31.7	37	15.79	16.77
assembly_00620_gene	gnl.Prokka.assembly_1[+]571466-572524	1040	197.96	210.5	512	141.25	153.24	496	155.98	165.62
assembly_01390_gene	gnl.Prokka.assembly_1[+]1308855-1309349	84	34.2	36.37	43	25.38	27.53	51	34.31	36.43
assembly_01113_gene	gnl.Prokka.assembly_1[-]1037894-1038889	2451	496.04	527.46	1402	411.27	446.17	1215	406.26	431.38
assembly_02240_gene	gnl.Prokka.assembly_2[-]114932-115153	0	0	0	0	0	0	0	0	0
assembly_00024_gene	gnl.Prokka.assembly_1[+]25259-26134	1057	243.22	258.63	1987	662.72	718.96	1008	383.21	406.91
assembly_00915_gene	gnl.Prokka.assembly_1[-]853143-853691	425	156.05	165.93	160	85.15	92.38	197	119.5	126.89
assembly_00583_gene	gnl.Prokka.assembly_1[+]531352-531588	184	156.5	166.41	137	168.89	183.22	107	150.35	159.65
assembly_01755_gene	gnl.Prokka.assembly_1[-]1630947-1631285	1001	595.21	632.91	2610	2249.43	2440.33	1350	1326.22	1408.23
assembly_00335_gene	gnl.Prokka.assembly_1[-]306934-307677	2006	543.49	577.92	815	320.05	347.21	786	351.82	373.58
assembly_00734_gene	gnl.Prokka.assembly_1[+]678079-679380	2212	342.46	364.15	1236	277.36	300.9	1097	280.59	297.94
assembly_00426_gene	gnl.Prokka.assembly_1[+]389693-390760	5450	1028.63	1093.79	2688	735.34	797.75	2266	706.6	750.29
assembly_00663_gene	gnl.Prokka.assembly_1[+]613469-617026	3369	190.87	202.96	2168	178.03	193.14	2039	190.85	202.65
assembly_00188_gene	gnl.Prokka.assembly_1[+]164637-165449	266	65.95	70.13	157	56.42	61.21	141	57.76	61.33
assembly_00750_gene	gnl.Prokka.assembly_1[-]692153-693052	12	2.69	2.86	7	2.28	2.47	7	2.59	2.75
assembly_00237_gene	gnl.Prokka.assembly_1[-]216660-216956	14	9.5	10.1	14	13.77	14.94	18	20.18	21.43
assembly_01346_gene	gnl.Prokka.assembly_1[-]1266272-1266586	642	410.83	436.85	367	340.4	369.29	296	312.94	332.29
assembly_01622_gene	gnl.Prokka.assembly_1[-]1518053-1518448	48	24.43	25.98	27	19.92	21.61	12	10.1	10.72
assembly_02086_gene	gnl.Prokka.assembly_2[+]7442-9196	449	51.57	54.84	261	43.45	47.14	217	41.17	43.72
assembly_00164_gene	gnl.Prokka.assembly_1[+]145237-145650	137	66.7	70.93	186	131.26	142.4	157	126.29	134.1
assembly_01037_gene	gnl.Prokka.assembly_1[-]963308-963919	1675	551.69	586.64	1249	596.27	646.87	648	352.62	374.42
assembly_01962_gene	gnl.Prokka.assembly_1[-]1808616-1809803	1644	278.95	296.62	1078	265.11	287.61	733	205.48	218.19
assembly_01402_gene	gnl.Prokka.assembly_1[+]1323515-1324228	1064	300.38	319.41	1377	563.47	611.29	885	412.79	438.31
assembly_00744_gene	gnl.Prokka.assembly_1[+]687277-688431	877	153.05	162.75	339	85.75	93.03	402	115.91	123.08
assembly_01469_gene	gnl.Prokka.assembly_1[-]1383583-1384002	1426	684.39	727.74	859	597.55	648.26	772	612.14	649.99
assembly_01736_gene	gnl.Prokka.assembly_1[-]1619244-1619879	2939	931.49	990.49	1453	667.48	724.13	1340	701.66	745.05
assembly_01175_gene	gnl.Prokka.assembly_1[+]1099363-1100469	656	119.45	127.02	478	126.15	136.86	350	105.29	111.8
assembly_00199_gene	gnl.Prokka.assembly_1[-]177310-178518	1210	201.74	214.52	874	211.21	229.14	724	199.43	211.76
assembly_00390_gene	gnl.Prokka.assembly_1[-]355873-357960	1368	132.06	140.43	1034	144.68	156.96	810	129.19	137.18
assembly_01196_gene	gnl.Prokka.assembly_1[-]1117716-1119041	1627	247.33	263	760	167.46	181.67	659	165.51	175.74
assembly_00898_gene	gnl.Prokka.assembly_1[+]835925-836371	729	328.75	349.57	553	361.45	392.13	329	245.11	260.27
assembly_01986_gene	gnl.Prokka.assembly_1[-]1832092-1833069	420	86.57	92.05	188	56.16	60.93	162	55.17	58.58
assembly_01738_gene	gnl.Prokka.assembly_1[-]1620648-1621994	3790	567.16	603.09	1912	414.71	449.91	1607	397.31	421.88
assembly_01762_gene	gnl.Prokka.assembly_1[-]1633768-1634085	1176	745.44	792.66	2520	2315.29	2511.78	1192	1248.33	1325.52
assembly_00560_gene	gnl.Prokka.assembly_1[-]508387-508974	3945	1352.39	1438.06	2526	1255.13	1361.65	4430	2509.04	2664.19
assembly_01555_gene	gnl.Prokka.assembly_1[-]1459686-1460099	8090	3938.97	4188.48	4088	2884.98	3129.82	4866	3914.29	4156.33
assembly_01841_gene	gnl.Prokka.assembly_1[+]1693635-1693874	359	301.52	320.62	219	266.6	289.23	194	269.19	285.84
assembly_00891_gene	gnl.Prokka.assembly_1[-]828233-828967	1728	473.9	503.92	918	364.91	395.88	942	426.82	453.21
assembly_01670_gene	gnl.Prokka.assembly_1[-]1561241-1561828	242	82.96	88.22	183	90.93	98.65	135	76.46	81.19
assembly_01839_gene	gnl.Prokka.assembly_1[+]1692243-1693430	1736	294.55	313.21	1499	368.65	399.94	1202	336.95	357.79
assembly_02158_gene	gnl.Prokka.assembly_2[-]67960-69201	23	3.73	3.97	4	0.94	1.02	7	1.87	1.99
assembly_01040_gene	gnl.Prokka.assembly_1[-]966073-966870	653	164.95	175.4	278	101.78	110.42	256	106.83	113.44
assembly_01982_gene	gnl.Prokka.assembly_1[-]1826148-1828994	416383	29480.8	31348.3	196911	20207.6	21922.5	250792	29336.4	31150.5
assembly_02358_gene	gnl.Prokka.assembly_2[-]226796-227614	239	58.82	62.55	164	58.5	63.47	162	65.88	69.95
assembly_01571_gene	gnl.Prokka.assembly_1[+]1476785-1479178	13961	1175.51	1249.97	10804	1318.54	1430.44	11631	1617.98	1718.03
assembly_02140_gene	gnl.Prokka.assembly_2[+]55906-56100	10	10.34	10.99	40	59.93	65.02	10	17.07	18.13
assembly_01746_gene	gnl.Prokka.assembly_1[-]1626443-1626823	1491	788.83	838.8	3421	2623.37	2846.01	2160	1888.03	2004.78
assembly_02363_gene	gnl.Prokka.assembly_2[+]229484-229654	65	76.63	81.48	45	76.88	83.41	32	62.32	66.17
assembly_01157_gene	gnl.Prokka.assembly_1[+]1081973-1082473	1284	516.61	549.33	820	478.2	518.78	624	414.79	440.44
assembly_00522_gene	gnl.Prokka.assembly_1[+]475757-476812	1799	343.4	365.15	811	224.39	243.43	713	224.86	238.76
assembly_01992_gene	gnl.Prokka.assembly_1[-]1837431-1838240	1320	328.49	349.3	1076	388.11	421.05	880	361.81	384.18
assembly_01721_gene	gnl.Prokka.assembly_1[+]1603627-1604709	2830	526.73	560.1	1290	348.02	377.55	1376	423.13	449.29
assembly_01652_gene	gnl.Prokka.assembly_1[-]1543349-1544239	609	137.77	146.5	435	142.64	154.75	271	101.29	107.55
assembly_00652_gene	gnl.Prokka.assembly_1[-]603026-603793	1924	504.98	536.97	614	233.59	253.41	593	257.14	273.04
assembly_01476_gene	gnl.Prokka.assembly_1[-]1388390-1388959	1652	584.21	621.22	2065	1058.47	1148.3	1513	883.99	938.65
assembly_00971_gene	gnl.Prokka.assembly_1[-]904727-905434	29	8.26	8.78	83	34.25	37.16	57	26.81	28.47
assembly_00163_gene	gnl.Prokka.assembly_1[-]144003-145106	15930	2908.58	3092.82	11339	3000.8	3255.47	10573	3189.41	3386.63
assembly_00712_gene	gnl.Prokka.assembly_1[+]658409-658840	98	45.72	48.62	51	34.49	37.42	47	36.23	38.47
assembly_00852_gene	gnl.Prokka.assembly_1[-]791020-791955	768	165.39	175.87	276	86.15	93.46	230	81.83	86.89
assembly_01155_gene	gnl.Prokka.assembly_1[+]1079653-1080888	8620	1405.8	1494.85	4493	1062.07	1152.2	4243	1143.24	1213.93
assembly_01642_gene	gnl.Prokka.assembly_1[-]1534162-1534605	153	69.46	73.86	66	43.43	47.12	42	31.5	33.45
assembly_00391_gene	gnl.Prokka.assembly_1[+]358026-359270	1972	319.28	339.5	1579	370.55	402	1246	333.3	353.91
assembly_00839_gene	gnl.Prokka.assembly_1[-]777760-780147	31089	2624.26	2790.49	17792	2176.82	2361.56	17014	2372.76	2519.48
assembly_02185_gene	gnl.Prokka.assembly_2[+]90783-91172	120	62.02	65.95	46	34.47	37.39	39	33.3	35.36
assembly_01529_gene	gnl.Prokka.assembly_1[+]1435930-1436886	1175	247.49	263.17	792	241.79	262.31	673	234.2	248.68
assembly_00906_gene	gnl.Prokka.assembly_1[-]843630-844382	19	5.09	5.41	8	3.11	3.37	8	3.54	3.76
assembly_02047_gene	gnl.Prokka.assembly_1[+]1878683-1879597	4058	893.97	950.6	2519	804.34	872.6	2508	912.82	969.27
assembly_00320_gene	gnl.Prokka.assembly_1[-]292035-293318	7632	1198.14	1274.04	5427	1234.89	1339.69	5085	1318.89	1400.44
assembly_00045_gene	gnl.Prokka.assembly_1[+]43113-43490	196	104.52	111.14	113	87.34	94.75	88	77.53	82.32
assembly_00316_gene	gnl.Prokka.assembly_1[+]287154-287771	569	185.59	197.35	421	199.03	215.92	387	208.54	221.44
assembly_00812_gene	gnl.Prokka.assembly_1[+]754429-754761	70	42.38	45.06	216	189.52	205.6	75	75	79.64
assembly_01996_gene	gnl.Prokka.assembly_1[-]1840407-1840721	524	335.32	356.56	564	523.11	567.51	508	537.07	570.28
assembly_00908_gene	gnl.Prokka.assembly_1[-]845098-846534	6	0.84	0.89	11	2.24	2.43	6	1.39	1.48
assembly_00952_gene	gnl.Prokka.assembly_1[-]882192-883064	939	216.82	230.55	583	195.11	211.67	434	165.56	175.8
assembly_00429_gene	gnl.Prokka.assembly_1[+]393373-393765	139	71.29	75.81	85	63.19	68.55	69	58.47	62.09
assembly_00002_gene	gnl.Prokka.assembly_1[+]1613-2740	651	116.33	123.7	564	146.08	158.48	351	103.63	110.04
assembly_01941_gene	gnl.Prokka.assembly_1[-]1788842-1789423	549	190.15	202.19	354	177.71	192.79	303	173.38	184.1
assembly_00054_gene	gnl.Prokka.assembly_1[+]48356-49327	327	67.81	72.11	277	83.26	90.33	251	86	91.32
assembly_00491_gene	gnl.Prokka.assembly_1[+]448802-449926	1784	319.65	339.9	1211	314.5	341.19	1164	344.57	365.88
assembly_01832_gene	gnl.Prokka.assembly_1[-]1686113-1686466	10113	5758.52	6123.29	5210	4299.98	4664.91	5335	5018.94	5329.29
assembly_00604_gene	gnl.Prokka.assembly_1[-]548796-549341	2021	746.12	793.38	1565	837.44	908.51	1343	819.15	869.8
assembly_02143_gene	gnl.Prokka.assembly_2[-]57684-59147	300	41.3	43.92	207	41.31	44.82	222	50.5	53.62
assembly_01069_gene	gnl.Prokka.assembly_1[-]1002754-1003296	64	23.76	25.26	46	24.75	26.85	47	28.83	30.61
assembly_01038_gene	gnl.Prokka.assembly_1[-]964024-964965	319	68.27	72.59	163	50.56	54.85	136	48.08	51.05
assembly_00557_gene	gnl.Prokka.assembly_1[+]505692-507113	5522	782.77	832.35	7782	1598.91	1734.6	5895	1380.59	1465.96
assembly_00239_gene	gnl.Prokka.assembly_1[-]217480-217896	11	5.31	5.65	14	9.81	10.64	15	11.98	12.72
assembly_00548_gene	gnl.Prokka.assembly_1[-]496681-497217	156	58.56	62.27	137	74.53	80.86	105	65.11	69.14
assembly_01682_gene	gnl.Prokka.assembly_1[+]1572074-1572412	1207	717.7	763.16	744	641.22	695.64	593	582.56	618.58
assembly_00475_gene	gnl.Prokka.assembly_1[-]432830-434236	2212	316.91	336.98	1476	306.5	332.51	1198	283.56	301.09
assembly_02030_gene	gnl.Prokka.assembly_1[-]1866107-1867270	1863	322.62	343.06	1279	321.03	348.28	1241	355.05	377.01
assembly_00520_gene	gnl.Prokka.assembly_1[+]474159-475157	1981	399.72	425.04	1261	368.79	400.09	1111	370.37	393.27
assembly_01983_gene	gnl.Prokka.assembly_1[+]1829495-1831309	3919	435.24	462.81	3426	551.5	598.3	2895	531.19	564.04
assembly_02197_gene	gnl.Prokka.assembly_2[-]94073-95050	3	0.62	0.66	2	0.6	0.65	0	0	0
assembly_00855_gene	gnl.Prokka.assembly_1[-]794711-795589	427	97.92	104.12	226	75.12	81.49	160	60.62	64.37
assembly_00134_gene	gnl.Prokka.assembly_1[-]125106-126401	208	32.35	34.4	166	37.42	40.6	127	32.63	34.65
assembly_02288_gene	gnl.Prokka.assembly_2[+]162553-163014	137	59.77	63.56	50	31.62	34.3	52	37.48	39.8
assembly_00911_gene	gnl.Prokka.assembly_1[+]847808-848599	382	97.22	103.38	242	89.27	96.85	212	89.15	94.66
assembly_00826_gene	gnl.Prokka.assembly_1[-]765798-766709	868	191.85	204	440	140.96	152.92	412	150.45	159.75
assembly_01381_gene	gnl.Prokka.assembly_1[-]1299151-1300350	320	53.75	57.16	222	54.05	58.64	176	48.84	51.86
assembly_00357_gene	gnl.Prokka.assembly_1[+]326740-328866	505	47.86	50.89	252	34.61	37.55	205	32.1	34.08
assembly_00639_gene	gnl.Prokka.assembly_1[-]590660-591613	1911	403.78	429.36	1173	359.23	389.72	1005	350.84	372.53
assembly_02221_gene	gnl.Prokka.assembly_2[-]106172-106402	21	18.33	19.49	24	30.35	32.93	29	41.8	44.39
assembly_01840_gene	gnl.Prokka.assembly_1[+]1693435-1693638	454	448.6	477.02	363	519.89	564.01	329	537.09	570.3
assembly_00857_gene	gnl.Prokka.assembly_1[-]796791-797417	558	179.39	190.75	388	180.8	196.14	346	183.78	195.14
assembly_00551_gene	gnl.Prokka.assembly_1[+]498459-500189	3996	465.33	494.81	2670	450.65	488.9	2237	430.38	456.99
assembly_01222_gene	gnl.Prokka.assembly_1[-]1145010-1145438	275	129.21	137.4	166	113.06	122.65	167	129.64	137.66
assembly_01851_gene	gnl.Prokka.assembly_1[-]1704422-1705060	104	32.81	34.89	84	38.41	41.67	53	27.62	29.33
assembly_00613_gene	gnl.Prokka.assembly_1[+]564246-564989	909	246.28	261.88	474	186.14	201.94	416	186.21	197.72
assembly_01125_gene	gnl.Prokka.assembly_1[-]1051166-1053286	917	87.15	92.67	353	48.62	52.75	332	52.13	55.35
assembly_00545_gene	gnl.Prokka.assembly_1[-]494850-495344	645	262.65	279.29	499	294.52	319.52	375	252.29	267.89
assembly_00363_gene	gnl.Prokka.assembly_1[-]331896-332798	1978	441.54	469.51	659	213.22	231.32	742	273.65	290.57
assembly_01745_gene	gnl.Prokka.assembly_1[-]1626017-1626406	2085	1077.65	1145.91	3591	2690.19	2918.5	2279	1946.08	2066.42
assembly_01403_gene	gnl.Prokka.assembly_1[+]1324320-1325897	20358	2600.53	2765.26	17975	3328.09	3610.53	14721	3106.78	3298.89
assembly_00412_gene	gnl.Prokka.assembly_1[+]376164-377972	3614	402.7	428.21	1971	318.33	345.35	1458	268.41	285.01
assembly_02351_gene	gnl.Prokka.assembly_2[+]222125-222655	324	123	130.79	237	130.4	141.47	172	107.87	114.54
assembly_00801_gene	gnl.Prokka.assembly_1[+]744118-744492	558	299.94	318.94	166	129.33	140.31	208	184.72	196.14
assembly_00309_gene	gnl.Prokka.assembly_1[+]283641-284066	230	108.83	115.72	173	118.65	128.72	139	108.66	115.38
assembly_00561_gene	gnl.Prokka.assembly_1[-]508974-511271	17134	1502.95	1598.15	20961	2664.98	2891.15	29410	4262.12	4525.67
assembly_01117_gene	gnl.Prokka.assembly_1[+]1041505-1042296	68	17.3	18.4	44	16.23	17.61	43	18.08	19.2
assembly_00438_gene	gnl.Prokka.assembly_1[-]401923-402315	163	83.6	88.9	27	20.08	21.78	58	49.15	52.19
assembly_01336_gene	gnl.Prokka.assembly_1[+]1256395-1257171	252	65.38	69.52	143	53.77	58.33	122	52.29	55.52
assembly_00510_gene	gnl.Prokka.assembly_1[+]465885-466082	550	559.93	595.4	269	396.93	430.62	297	499.54	530.43
assembly_00441_gene	gnl.Prokka.assembly_1[+]404683-406056	419	61.47	65.36	463	98.45	106.81	286	69.32	73.61
assembly_01075_gene	gnl.Prokka.assembly_1[+]1008361-1009674	229	35.13	37.35	199	44.25	48	123	31.17	33.1
assembly_01441_gene	gnl.Prokka.assembly_1[-]1359321-1359686	22	12.11	12.88	23	18.36	19.92	12	10.92	11.59
assembly_01112_gene	gnl.Prokka.assembly_1[-]1037497-1037916	701	336.44	357.75	369	256.69	278.47	273	216.46	229.85
assembly_00153_gene	gnl.Prokka.assembly_1[+]135291-136262	3888	806.3	857.37	2271	682.63	740.56	2319	794.54	843.67
assembly_00057_gene	gnl.Prokka.assembly_1[+]50740-51465	2598	721.34	767.03	1231	495.4	537.44	1167	535.32	568.42
assembly_01153_gene	gnl.Prokka.assembly_1[+]1078262-1079059	778	196.52	208.97	597	218.58	237.13	563	234.95	249.48
assembly_02183_gene	gnl.Prokka.assembly_2[+]88854-90509	404	49.18	52.29	198	34.94	37.9	217	43.64	46.34
assembly_01292_gene	gnl.Prokka.assembly_1[+]1209537-1210079	374	138.84	147.63	224	120.52	130.75	259	158.85	168.67
assembly_02001_gene	gnl.Prokka.assembly_1[-]1842917-1844047	3298	587.79	625.02	2135	551.52	598.33	2407	708.75	752.58
assembly_02265_gene	gnl.Prokka.assembly_2[+]141561-142772	1771	294.54	313.2	2175	524.31	568.81	1447	397.6	422.19
assembly_02171_gene	gnl.Prokka.assembly_2[-]79300-80205	54	12.02	12.78	62	19.99	21.69	39	14.33	15.22
assembly_00490_gene	gnl.Prokka.assembly_1[+]448337-448786	680	304.6	323.9	648	420.72	456.43	539	398.89	423.56
assembly_01282_gene	gnl.Prokka.assembly_1[-]1199769-1200281	538	211.4	224.79	338	192.5	208.84	238	154.51	164.06
assembly_00544_gene	gnl.Prokka.assembly_1[-]493744-494853	1147	208.3	221.49	653	171.88	186.47	598	179.42	190.51
assembly_00100_gene	gnl.Prokka.assembly_1[+]90334-91554	3137	517.88	550.69	3370	806.39	874.83	2819	768.89	816.43
assembly_01697_gene	gnl.Prokka.assembly_1[-]1581078-1582388	2756	423.75	450.59	1896	422.54	458.4	1554	394.76	419.17
assembly_01906_gene	gnl.Prokka.assembly_1[-]1747983-1748843	2213	518.1	550.92	1092	370.55	402	1061	410.38	435.76
assembly_02262_gene	gnl.Prokka.assembly_2[+]139110-139772	1224	372.14	395.71	921	405.87	440.31	702	352.62	374.42
assembly_01711_gene	gnl.Prokka.assembly_1[-]1593536-1594330	1063	269.53	286.6	953	350.24	379.96	613	256.79	272.67
assembly_00326_gene	gnl.Prokka.assembly_1[-]297906-299003	10323	1895.12	2015.17	9448	2514.02	2727.38	8140	2468.89	2621.56
assembly_00290_gene	gnl.Prokka.assembly_1[+]263304-264536	1280	209.25	222.51	762	180.56	195.88	566	152.88	162.33
assembly_00225_gene	gnl.Prokka.assembly_1[-]203542-204102	3352	1204.42	1280.71	1657	862.96	936.2	1421	843.55	895.71
assembly_00853_gene	gnl.Prokka.assembly_1[-]791978-793288	1386	213.1	226.6	478	106.53	115.57	426	108.22	114.91
assembly_02039_gene	gnl.Prokka.assembly_1[+]1872260-1872730	124	53.07	56.43	77	47.77	51.82	58	41.01	43.55
assembly_01224_gene	gnl.Prokka.assembly_1[+]1146775-1147719	11399	2431.47	2585.49	10647	3291.76	3571.12	7925	2792.85	2965.55
assembly_02287_gene	gnl.Prokka.assembly_2[+]161825-162511	991	290.77	309.19	451	191.8	208.08	440	213.29	226.48
assembly_00056_gene	gnl.Prokka.assembly_1[+]49600-50736	20445	3624.6	3854.2	13448	3455.65	3748.92	13574	3975.83	4221.68
assembly_00428_gene	gnl.Prokka.assembly_1[+]391731-393368	488	60.06	63.86	133	23.73	25.74	109	22.16	23.53
assembly_01478_gene	gnl.Prokka.assembly_1[-]1389678-1390235	36	13.01	13.83	95	49.74	53.96	64	38.2	40.56
assembly_01152_gene	gnl.Prokka.assembly_1[+]1076932-1078272	911	136.94	145.61	584	127.24	138.04	470	116.72	123.94
assembly_00142_gene	gnl.Prokka.assembly_1[+]128492-129046	464	168.52	179.2	576	303.23	328.96	405	243.02	258.05
assembly_01090_gene	gnl.Prokka.assembly_1[+]1020951-1021358	103	50.89	54.11	33	23.63	25.64	28	22.86	24.27
assembly_02129_gene	gnl.Prokka.assembly_2[+]49556-50788	965	157.76	167.75	780	184.82	200.51	665	179.61	190.72
assembly_00196_gene	gnl.Prokka.assembly_1[+]174018-175097	2300	429.28	456.47	2057	556.47	603.7	1297	399.94	424.67
assembly_01923_gene	gnl.Prokka.assembly_1[-]1769333-1770046	1443	407.38	433.19	717	293.39	318.29	714	333.03	353.62
assembly_00895_gene	gnl.Prokka.assembly_1[-]832248-832649	178	89.26	94.91	267	194.05	210.52	226	187.22	198.8
assembly_02169_gene	gnl.Prokka.assembly_2[-]78171-79196	36	7.07	7.52	57	16.23	17.61	24	7.79	8.27
assembly_01242_gene	gnl.Prokka.assembly_1[-]1166701-1168005	855	132.06	140.43	683	152.91	165.89	572	145.97	155
assembly_00811_gene	gnl.Prokka.assembly_1[+]753696-754448	436	116.72	124.11	1295	502.47	545.11	685	302.96	321.69
assembly_01741_gene	gnl.Prokka.assembly_1[+]1623447-1623926	836	351.07	373.31	485	295.21	320.26	387	268.51	285.11
assembly_00890_gene	gnl.Prokka.assembly_1[-]827686-827943	107	83.59	88.89	34	38.5	41.77	33	42.6	45.23
assembly_01207_gene	gnl.Prokka.assembly_1[-]1128638-1131067	4703	390.13	414.84	6529	785.01	851.63	5825	798.31	847.67
assembly_01823_gene	gnl.Prokka.assembly_1[-]1678460-1679428	879	182.85	194.43	494	148.95	161.59	385	132.32	140.5
assembly_00554_gene	gnl.Prokka.assembly_1[+]502815-503864	1693	325.01	345.6	983	273.53	296.74	827	262.3	278.52
assembly_01031_gene	gnl.Prokka.assembly_1[+]958135-958560	110	52.05	55.35	37	25.38	27.53	33	25.79	27.39
assembly_01846_gene	gnl.Prokka.assembly_1[-]1698428-1699426	127	25.63	27.25	111	32.46	35.22	70	23.34	24.78
assembly_02089_gene	gnl.Prokka.assembly_2[+]11471-12331	450	105.36	112.03	176	59.72	64.79	133	51.44	54.62
assembly_00415_gene	gnl.Prokka.assembly_1[+]379387-380583	535	90.09	95.8	349	85.18	92.41	243	67.61	71.79
assembly_01315_gene	gnl.Prokka.assembly_1[+]1226406-1227950	1141	148.86	158.29	997	188.54	204.54	945	203.69	216.29
assembly_02124_gene	gnl.Prokka.assembly_2[+]46157-46342	0	0	0	0	0	0	0	0	0
assembly_01559_gene	gnl.Prokka.assembly_1[-]1464411-1464647	459	390.39	415.12	210	258.88	280.85	183	257.15	273.05
assembly_00776_gene	gnl.Prokka.assembly_1[-]717406-719148	3330	385.11	409.5	1823	305.58	331.51	1641	313.54	332.93
assembly_00921_gene	gnl.Prokka.assembly_1[+]856387-856659	1884	1391.08	1479.2	1796	1922.1	2085.22	1531	1867.64	1983.13
assembly_00558_gene	gnl.Prokka.assembly_1[-]507155-507595	45444	20771.7	22087.5	1696	1123.62	1218.98	6188	4672.96	4961.92
assembly_00055_gene	gnl.Prokka.assembly_1[+]49337-49594	1345	1050.84	1117.41	1007	1140.36	1237.14	1048	1352.76	1436.41
assembly_01150_gene	gnl.Prokka.assembly_1[+]1074858-1075919	1211	229.85	244.41	614	168.91	183.25	463	145.19	154.17
assembly_00106_gene	gnl.Prokka.assembly_1[+]96377-96595	685	630.49	670.43	624	832.48	903.13	568	863.74	917.15
assembly_02272_gene	gnl.Prokka.assembly_2[+]147580-148287	1193	339.65	361.17	1260	519.96	564.09	857	403.11	428.04
assembly_00536_gene	gnl.Prokka.assembly_1[-]485139-486521	906	132.05	140.42	404	85.35	92.59	381	91.75	97.42
assembly_01911_gene	gnl.Prokka.assembly_1[-]1757868-1758509	1339	420.42	447.05	930	423.23	459.15	771	399.95	424.68
assembly_00828_gene	gnl.Prokka.assembly_1[-]767858-769123	3223	513.17	545.68	1950	450.02	488.21	1801	473.76	503.06
assembly_01002_gene	gnl.Prokka.assembly_1[-]930155-930916	90	23.81	25.32	67	25.69	27.87	38	16.6	17.63
assembly_01420_gene	gnl.Prokka.assembly_1[+]1341770-1342990	597	98.56	104.8	384	91.88	99.68	269	73.37	77.91
assembly_01415_gene	gnl.Prokka.assembly_1[+]1338167-1338808	391	122.76	130.54	219	99.66	108.12	188	97.52	103.55
assembly_00753_gene	gnl.Prokka.assembly_1[-]695126-695551	12	5.68	6.04	7	4.8	5.21	5	3.91	4.15
assembly_01739_gene	gnl.Prokka.assembly_1[+]1622063-1622575	2231	876.63	932.16	1422	809.87	878.6	1207	783.56	832.01
assembly_00379_gene	gnl.Prokka.assembly_1[+]345511-345807	286	194.1	206.4	186	182.97	198.5	160	179.41	190.5
assembly_01015_gene	gnl.Prokka.assembly_1[+]941645-942079	97	44.95	47.8	55	36.94	40.08	41	31.39	33.33
assembly_01204_gene	gnl.Prokka.assembly_1[+]1124378-1124647	2126	1587.21	1687.75	2228	2410.92	2615.53	2148	2649.42	2813.25
assembly_02037_gene	gnl.Prokka.assembly_1[+]1871182-1871625	161	73.09	77.72	87	57.25	62.11	76	57.01	60.53
assembly_01000_gene	gnl.Prokka.assembly_1[+]928186-928704	1	0.39	0.41	0	0	0	2	1.28	1.36
assembly_01307_gene	gnl.Prokka.assembly_1[-]1221001-1221780	2048	529.26	562.79	1033	386.93	419.77	969	413.73	439.31
assembly_00260_gene	gnl.Prokka.assembly_1[-]235067-236203	7329	1299.32	1381.63	3635	934.06	1013.33	3465	1014.9	1077.66
assembly_02049_gene	gnl.Prokka.assembly_1[+]1880951-1882003	744	142.42	151.44	796	220.86	239.6	629	198.93	211.23
assembly_01278_gene	gnl.Prokka.assembly_1[-]1195018-1196592	1708	218.59	232.44	1947	361.18	391.83	1334	282.07	299.51
assembly_01354_gene	gnl.Prokka.assembly_1[-]1273235-1274263	2282	447.02	475.34	1096	311.19	337.6	997	322.67	342.62
assembly_02083_gene	gnl.Prokka.assembly_2[-]5259-5978	57	15.96	16.97	24	9.74	10.57	20	9.25	9.82
assembly_00670_gene	gnl.Prokka.assembly_1[+]621407-622165	3347	888.89	945.2	1728	665.17	721.62	1766	774.87	822.79
assembly_00626_gene	gnl.Prokka.assembly_1[-]577446-578222	36	9.34	9.93	35	13.16	14.28	19	8.15	8.65
assembly_00977_gene	gnl.Prokka.assembly_1[+]909039-910283	6012	973.38	1035.04	3142	737.34	799.92	2835	758.34	805.23
assembly_00403_gene	gnl.Prokka.assembly_1[-]367537-368514	933	192.3	204.48	912	272.45	295.57	666	226.79	240.81
assembly_00496_gene	gnl.Prokka.assembly_1[+]453001-453705	267	76.34	81.18	145	60.09	65.19	102	48.18	51.16
assembly_01479_gene	gnl.Prokka.assembly_1[-]1390228-1391520	31	4.83	5.14	144	32.54	35.3	71	18.29	19.42
assembly_00037_gene	gnl.Prokka.assembly_1[+]36314-37558	929	150.41	159.94	523	122.73	133.15	424	113.42	120.43
assembly_01230_gene	gnl.Prokka.assembly_1[-]1152198-1152809	115	37.88	40.28	52	24.82	26.93	77	41.9	44.49
assembly_01257_gene	gnl.Prokka.assembly_1[+]1180057-1180620	619	221.23	235.24	424	219.64	238.28	324	191.31	203.14
assembly_01638_gene	gnl.Prokka.assembly_1[-]1530546-1531736	2468	417.7	444.16	2180	534.78	580.17	1348	376.93	400.24
assembly_02121_gene	gnl.Prokka.assembly_2[-]42072-44357	173	15.25	16.22	101	12.9	14	86	12.53	13.3
assembly_00868_gene	gnl.Prokka.assembly_1[+]806149-806838	41	11.98	12.74	25	10.58	11.48	19	9.17	9.74
assembly_00395_gene	gnl.Prokka.assembly_1[+]361039-362361	1553	236.62	251.61	1132	249.98	271.2	998	251.22	266.75
assembly_00437_gene	gnl.Prokka.assembly_1[-]400892-401926	339	66.02	70.2	39	11.01	11.94	60	19.31	20.5
assembly_00650_gene	gnl.Prokka.assembly_1[+]600371-601360	7	1.43	1.52	24	7.08	7.68	16	5.39	5.72
assembly_01483_gene	gnl.Prokka.assembly_1[-]1394180-1394986	104	25.97	27.62	153	55.39	60.09	72	29.71	31.55
assembly_00269_gene	gnl.Prokka.assembly_1[-]243673-244134	348	151.83	161.45	267	168.85	183.18	190	136.96	145.43
assembly_02286_gene	gnl.Prokka.assembly_2[+]161301-161828	390	148.89	158.32	211	116.76	126.67	189	119.21	126.58
assembly_01914_gene	gnl.Prokka.assembly_1[-]1759993-1761717	2121	247.85	263.55	1419	240.34	260.74	1210	233.6	248.05
assembly_00761_gene	gnl.Prokka.assembly_1[-]704743-706458	2433	285.8	303.9	2411	410.5	445.34	1936	375.73	398.96
assembly_01383_gene	gnl.Prokka.assembly_1[+]1301505-1302554	1587	304.66	323.96	1866	519.22	563.29	2310	732.66	777.97
assembly_00870_gene	gnl.Prokka.assembly_1[-]807899-808933	1200	233.71	248.51	898	253.5	275.01	752	241.97	256.93
assembly_02153_gene	gnl.Prokka.assembly_2[+]63920-65599	382	45.84	48.74	3927	682.94	740.9	1347	267.02	283.53
assembly_00356_gene	gnl.Prokka.assembly_1[-]325664-326722	190	36.17	38.46	175	48.28	52.38	107	33.65	35.73
assembly_00845_gene	gnl.Prokka.assembly_1[+]785375-786415	298	57.7	61.36	164	46.02	49.93	127	40.63	43.14
assembly_01651_gene	gnl.Prokka.assembly_1[-]1543088-1543294	24	23.37	24.85	10	14.11	15.31	17	27.35	29.04
assembly_00909_gene	gnl.Prokka.assembly_1[+]846704-847393	2728	796.95	847.43	2224	941.71	1021.63	2105	1015.98	1078.8
assembly_01487_gene	gnl.Prokka.assembly_1[-]1397847-1398626	239	61.77	65.68	175	65.55	71.11	96	40.99	43.52
assembly_00997_gene	gnl.Prokka.assembly_1[-]926011-927051	1192	230.81	245.43	955	268.03	290.78	836	267.44	283.98
assembly_00606_gene	gnl.Prokka.assembly_1[-]551014-551280	106	80.02	85.09	67	73.32	79.54	77	96.04	101.98
assembly_01154_gene	gnl.Prokka.assembly_1[+]1079072-1079656	1339	461.38	490.61	745	372.07	403.65	693	394.51	418.9
assembly_02051_gene	gnl.Prokka.assembly_1[+]1884471-1884935	676	293.04	311.6	360	226.19	245.39	308	220.59	234.23
assembly_00468_gene	gnl.Prokka.assembly_1[-]427656-428576	219	47.93	50.97	122	38.71	41.99	106	38.33	40.7
assembly_01115_gene	gnl.Prokka.assembly_1[-]1039203-1040180	5630	1160.39	1233.89	3440	1027.67	1114.88	3084	1050.16	1115.1
assembly_00139_gene	gnl.Prokka.assembly_1[+]126884-128104	78	12.87	13.69	123	29.43	31.93	102	27.82	29.54
assembly_01109_gene	gnl.Prokka.assembly_1[-]1036231-1036701	872	373.19	396.83	743	460.9	500.01	663	468.78	497.77
assembly_00021_gene	gnl.Prokka.assembly_1[-]22740-23495	1100	293.29	311.87	418	161.54	175.25	438	192.95	204.88
assembly_01860_gene	gnl.Prokka.assembly_1[-]1712800-1713906	3337	607.64	646.13	2134	563.22	611.02	1965	591.15	627.7
assembly_01313_gene	gnl.Prokka.assembly_1[-]1225872-1226177	888	584.96	622.01	465	443.98	481.66	514	559.4	593.99
assembly_00669_gene	gnl.Prokka.assembly_1[+]621158-621388	1867	1629.17	1732.37	1127	1425.42	1546.39	1078	1554.13	1650.23
assembly_01520_gene	gnl.Prokka.assembly_1[+]1427898-1429166	567	90.06	95.77	375	86.34	93.67	326	85.55	90.84
assembly_01473_gene	gnl.Prokka.assembly_1[-]1386885-1386980	91	191.08	203.18	57	173.48	188.2	34	117.95	125.24
assembly_01764_gene	gnl.Prokka.assembly_1[-]1634283-1634708	2183	1032.95	1098.38	4631	3176.12	3445.67	2087	1631.52	1732.41
assembly_00677_gene	gnl.Prokka.assembly_1[-]625752-626819	2680	505.82	537.86	2153	588.98	638.97	1302	405.99	431.1
assembly_01387_gene	gnl.Prokka.assembly_1[-]1306146-1306721	231	80.84	85.96	152	77.1	83.64	87	50.3	53.41
assembly_00708_gene	gnl.Prokka.assembly_1[+]655298-656350	2158	413.1	439.27	1654	458.92	497.87	1104	349.16	370.75
assembly_02144_gene	gnl.Prokka.assembly_2[-]59430-59885	188	83.11	88.37	107	68.56	74.38	109	79.61	84.53
assembly_00254_gene	gnl.Prokka.assembly_1[-]230671-231402	169	46.54	49.49	80	31.93	34.64	78	35.49	37.68
assembly_00116_gene	gnl.Prokka.assembly_1[-]108701-110233	3742	492.03	523.2	2918	556.13	603.33	2079	451.64	479.57
assembly_01591_gene	gnl.Prokka.assembly_1[+]1493932-1495323	10398	1505.72	1601.1	5798	1216.94	1320.22	4627	1106.98	1175.43
assembly_02368_gene	gnl.Prokka.assembly_2[+]234608-236140	875	115.05	122.34	362	68.99	74.85	307	66.7	70.82
assembly_02157_gene	gnl.Prokka.assembly_2[-]67467-68006	5	1.86	1.98	2	1.08	1.17	0	0	0
assembly_01348_gene	gnl.Prokka.assembly_1[+]1267847-1268056	353	338.84	360.3	157	218.43	236.97	151	239.46	254.27
assembly_01277_gene	gnl.Prokka.assembly_1[+]1194687-1195037	199	114.28	121.52	84	69.92	75.85	95	90.14	95.71
assembly_00787_gene	gnl.Prokka.assembly_1[+]726670-727908	10110	1644.8	1748.99	4718	1112.55	1206.97	4826	1297.17	1377.38
assembly_00764_gene	gnl.Prokka.assembly_1[-]707879-708304	514	243.21	258.62	522	358.01	388.39	466	364.29	386.82
assembly_00628_gene	gnl.Prokka.assembly_1[-]579126-580310	1673	284.58	302.61	1689	416.43	451.77	1084	304.64	323.48
assembly_01064_gene	gnl.Prokka.assembly_1[-]993989-995512	2686	355.27	377.77	1112	213.18	231.27	969	211.75	224.84
assembly_01703_gene	gnl.Prokka.assembly_1[+]1586375-1587103	1676	463.42	492.78	966	387.15	420.01	840	383.73	407.46
assembly_01051_gene	gnl.Prokka.assembly_1[+]977816-979021	437	73.04	77.67	373	90.36	98.03	266	73.46	78
assembly_00800_gene	gnl.Prokka.assembly_1[+]742797-744137	4275	642.6	683.31	1788	389.56	422.62	1929	479.06	508.68
assembly_00564_gene	gnl.Prokka.assembly_1[-]512488-513453	216	45.07	47.93	273	82.57	89.58	306	105.5	112.02
assembly_01367_gene	gnl.Prokka.assembly_1[-]1286511-1287650	4442	785.43	835.18	3462	887.27	962.57	3002	876.97	931.2
assembly_01708_gene	gnl.Prokka.assembly_1[+]1590153-1591703	1077	139.97	148.84	1817	342.27	371.32	595	127.76	135.66
assembly_01137_gene	gnl.Prokka.assembly_1[-]1065236-1065853	71	23.16	24.63	74	34.98	37.95	58	31.26	33.19
assembly_01742_gene	gnl.Prokka.assembly_1[-]1624048-1624404	1544	871.8	927.02	2186	1789.01	1940.84	1478	1378.75	1464.01
assembly_00897_gene	gnl.Prokka.assembly_1[-]835336-835827	2454	1005.41	1069.1	2617	1554.07	1685.96	1484	1004.5	1066.61
assembly_00052_gene	gnl.Prokka.assembly_1[-]46700-47290	1489	507.86	540.03	927	458.28	497.17	897	505.45	536.71
assembly_01486_gene	gnl.Prokka.assembly_1[-]1397265-1397837	272	95.69	101.75	350	178.46	193.61	221	128.45	136.39
assembly_01929_gene	gnl.Prokka.assembly_1[-]1773488-1776136	3468	263.89	280.61	2795	308.27	334.43	2705	340.07	361.1
assembly_00031_gene	gnl.Prokka.assembly_1[+]32652-33083	210	97.98	104.19	154	104.15	112.99	154	118.72	126.06
assembly_00635_gene	gnl.Prokka.assembly_1[-]585242-586087	21	5	5.32	24	8.29	8.99	21	8.27	8.78
assembly_00160_gene	gnl.Prokka.assembly_1[-]141205-142560	10949	1627.6	1730.7	7543	1625.23	1763.16	7058	1733.41	1840.6
assembly_00823_gene	gnl.Prokka.assembly_1[+]762258-763832	2870	367.31	390.58	851	157.86	171.26	927	196.01	208.13
assembly_00954_gene	gnl.Prokka.assembly_1[-]884172-885221	955	183.34	194.95	598	166.4	180.52	439	139.24	147.85
assembly_01759_gene	gnl.Prokka.assembly_1[-]1632519-1633067	2498	917.18	975.28	4998	2659.85	2885.58	2417	1466.17	1556.83
assembly_01057_gene	gnl.Prokka.assembly_1[+]985772-988495	5102	377.54	401.46	2906	311.69	338.14	2771	338.77	359.72
assembly_00540_gene	gnl.Prokka.assembly_1[+]489814-491112	1568	243.32	258.73	916	206.03	223.51	725	185.87	197.36
assembly_01047_gene	gnl.Prokka.assembly_1[-]972398-973879	601	81.74	86.92	269	53.03	57.53	245	55.06	58.46
assembly_01516_gene	gnl.Prokka.assembly_1[+]1424001-1425335	8416	1270.74	1351.24	14975	3277.31	3555.45	13663	3408.36	3619.12
assembly_02254_gene	gnl.Prokka.assembly_2[+]132184-133770	27	3.43	3.65	15	2.77	3	16	3.36	3.57
assembly_01194_gene	gnl.Prokka.assembly_1[-]1115902-1116786	488	111.15	118.19	250	82.54	89.54	176	66.22	70.32
assembly_00252_gene	gnl.Prokka.assembly_1[+]229049-230239	2521	426.67	453.7	887	217.59	236.06	831	232.36	246.73
assembly_01423_gene	gnl.Prokka.assembly_1[+]1345969-1346280	830	536.24	570.21	505	472.9	513.03	424	452.57	480.56
assembly_01626_gene	gnl.Prokka.assembly_1[+]1520471-1522243	2218	252.17	268.14	1302	214.55	232.76	1220	229.16	243.33
assembly_00092_gene	gnl.Prokka.assembly_1[-]83406-84122	295	82.94	88.19	229	93.31	101.23	158	73.38	77.92
assembly_01291_gene	gnl.Prokka.assembly_1[+]1208949-1209461	178	69.94	74.37	135	76.88	83.41	124	80.5	85.48
assembly_01495_gene	gnl.Prokka.assembly_1[-]1402877-1404955	5144	498.75	530.34	3128	439.58	476.89	2660	426.09	452.44
assembly_00085_gene	gnl.Prokka.assembly_1[-]77626-78477	171	40.46	43.02	154	52.81	57.29	87	34.01	36.11
assembly_00938_gene	gnl.Prokka.assembly_1[-]869889-870257	185	101.06	107.46	101	79.97	86.76	83	74.91	79.54
assembly_01568_gene	gnl.Prokka.assembly_1[-]1473476-1473850	624	335.42	356.67	311	242.31	262.87	245	217.58	231.03
assembly_00090_gene	gnl.Prokka.assembly_1[-]82110-82346	525	446.52	474.81	312	384.63	417.27	321	451.07	478.96
assembly_00235_gene	gnl.Prokka.assembly_1[-]212521-215451	8407	578.18	614.8	14962	1491.44	1618.01	13954	1585.49	1683.53
assembly_00759_gene	gnl.Prokka.assembly_1[-]702165-704372	3423	312.5	332.29	3868	511.82	555.26	3088	465.76	494.56
assembly_01773_gene	gnl.Prokka.assembly_1[-]1638796-1640016	185	30.55	32.48	212	50.73	55.03	117	31.92	33.89
assembly_01424_gene	gnl.Prokka.assembly_1[+]1346277-1346702	802	379.49	403.53	424	290.79	315.47	358	279.86	297.17
assembly_00109_gene	gnl.Prokka.assembly_1[-]99470-100405	2031	437.39	465.1	768	239.73	260.07	847	301.36	320
assembly_01428_gene	gnl.Prokka.assembly_1[+]1348293-1348658	153	84.26	89.6	73	58.27	63.22	64	58.24	61.84
assembly_01011_gene	gnl.Prokka.assembly_1[-]937743-938201	489	214.75	228.35	248	157.86	171.26	150	108.83	115.56
assembly_01162_gene	gnl.Prokka.assembly_1[-]1085586-1086800	3095	513.47	546	2444	587.7	637.58	2037	558.33	592.86
assembly_01046_gene	gnl.Prokka.assembly_1[-]971906-972310	92	45.79	48.69	40	28.85	31.3	43	35.35	37.54
assembly_01854_gene	gnl.Prokka.assembly_1[-]1707629-1708486	3457	812.16	863.61	1802	613.62	665.7	1592	617.93	656.14
assembly_00503_gene	gnl.Prokka.assembly_1[+]457855-459603	2842	327.54	348.29	1916	320.07	347.23	1415	269.43	286.09
assembly_00694_gene	gnl.Prokka.assembly_1[-]641852-643234	1076	156.83	166.76	851	179.78	195.04	611	147.13	156.23
assembly_01587_gene	gnl.Prokka.assembly_1[+]1490118-1490372	669	528.83	562.33	448	513.3	556.86	414	540.68	574.11
assembly_01691_gene	gnl.Prokka.assembly_1[+]1577803-1578414	190	62.58	66.54	150	71.61	77.69	125	68.02	72.23
assembly_00449_gene	gnl.Prokka.assembly_1[-]412710-413840	3600	641.62	682.26	1708	441.22	478.67	1483	436.68	463.68
assembly_01498_gene	gnl.Prokka.assembly_1[+]1406905-1408551	1556	190.44	202.5	769	136.41	147.99	713	144.17	153.09
assembly_01095_gene	gnl.Prokka.assembly_1[+]1025193-1026050	3517	826.26	878.6	4531	1542.91	1673.85	3082	1196.26	1270.23
assembly_01664_gene	gnl.Prokka.assembly_1[-]1556066-1556449	198	103.94	110.52	131	99.67	108.13	110	95.4	101.3
assembly_01557_gene	gnl.Prokka.assembly_1[-]1461296-1461685	4810	2486.08	2643.56	2515	1884.1	2044	2258	1928.15	2047.38
assembly_01740_gene	gnl.Prokka.assembly_1[-]1622572-1623405	147	35.53	37.78	86	30.12	32.68	50	19.97	21.2
assembly_01628_gene	gnl.Prokka.assembly_1[-]1523242-1523904	395	120.09	127.7	213	93.86	101.83	190	95.44	101.34
assembly_00361_gene	gnl.Prokka.assembly_1[-]330925-331164	795	667.71	710.01	317	385.91	418.66	283	392.7	416.98
assembly_00873_gene	gnl.Prokka.assembly_1[-]810449-811264	1253	309.52	329.13	826	295.75	320.85	510	208.14	221.01
assembly_01937_gene	gnl.Prokka.assembly_1[+]1784809-1786215	14908	2135.79	2271.08	13977	2902.36	3148.68	10904	2580.91	2740.5
assembly_01276_gene	gnl.Prokka.assembly_1[+]1194508-1194675	43	51.59	54.86	16	27.83	30.19	15	29.73	31.57
assembly_01004_gene	gnl.Prokka.assembly_1[-]931915-932874	63	13.23	14.07	50	15.22	16.51	19	6.59	7
assembly_01356_gene	gnl.Prokka.assembly_1[-]1277160-1278278	930	167.53	178.14	526	137.33	148.99	536	159.52	169.38
assembly_01102_gene	gnl.Prokka.assembly_1[-]1029580-1029846	171	129.1	137.28	226	247.3	268.29	177	220.77	234.42
assembly_00402_gene	gnl.Prokka.assembly_1[+]366729-367559	410	99.45	105.75	253	88.95	96.5	217	86.96	92.34
assembly_01323_gene	gnl.Prokka.assembly_1[+]1240388-1240813	177	83.75	89.06	97	66.52	72.17	85	66.45	70.56
assembly_01225_gene	gnl.Prokka.assembly_1[+]1147782-1149755	1684	171.96	182.85	1591	235.49	255.47	1059	178.66	189.71
assembly_00365_gene	gnl.Prokka.assembly_1[-]333150-334490	12863	1933.51	2055.99	5148	1121.61	1216.8	6184	1535.76	1630.72
assembly_00601_gene	gnl.Prokka.assembly_1[+]546881-547699	1792	441.05	468.99	1435	511.92	555.36	1191	484.29	514.24
assembly_00236_gene	gnl.Prokka.assembly_1[+]215536-216585	227	43.58	46.34	133	37.01	40.15	130	41.23	43.78
assembly_01405_gene	gnl.Prokka.assembly_1[+]1326966-1327814	1362	323.38	343.86	1282	441.18	478.62	800	313.81	333.21
assembly_01508_gene	gnl.Prokka.assembly_1[+]1414912-1417770	9491	669.16	711.55	5042	515.25	558.98	4277	498.2	529.01
assembly_00074_gene	gnl.Prokka.assembly_1[+]65687-66784	270	49.57	52.71	208	55.34	60.04	154	46.71	49.6
assembly_00943_gene	gnl.Prokka.assembly_1[-]874005-875114	1528	277.48	295.06	734	193.2	209.6	706	211.82	224.92
assembly_00874_gene	gnl.Prokka.assembly_1[-]811261-812379	1597	287.68	305.9	1299	339.17	367.95	993	295.53	313.8
assembly_01847_gene	gnl.Prokka.assembly_1[-]1699410-1699922	85	33.39	35.51	70	39.87	43.25	39	25.31	26.88
assembly_00148_gene	gnl.Prokka.assembly_1[+]131586-131852	4159	3139.87	3338.76	4881	5341.09	5794.37	3981	4965.48	5272.53
assembly_01052_gene	gnl.Prokka.assembly_1[-]979092-980576	720	97.73	103.92	319	62.76	68.09	304	68.17	72.39
assembly_00592_gene	gnl.Prokka.assembly_1[+]537448-537804	8895	5022.41	5340.55	3850	3150.83	3418.23	3810	3554.16	3773.94
assembly_02307_gene	gnl.Prokka.assembly_2[+]181271-181786	202	78.91	83.91	154	87.2	94.6	91	58.73	62.36
assembly_02256_gene	gnl.Prokka.assembly_2[-]135426-135989	665	237.67	252.73	354	183.38	198.94	385	227.33	241.39
assembly_02354_gene	gnl.Prokka.assembly_2[+]223527-223706	7	7.84	8.34	6	9.74	10.57	3	5.55	5.89
assembly_01531_gene	gnl.Prokka.assembly_1[-]1437271-1437897	946	304.13	323.39	505	235.32	255.29	576	305.94	324.86
assembly_00993_gene	gnl.Prokka.assembly_1[+]923378-923695	16	10.14	10.78	21	19.29	20.93	13	13.62	14.46
assembly_00996_gene	gnl.Prokka.assembly_1[-]925031-926011	1352	277.8	295.4	829	246.9	267.85	706	239.67	254.49
assembly_01193_gene	gnl.Prokka.assembly_1[-]1115728-1115892	111	135.6	144.19	72	127.49	138.31	67	135.23	143.59
assembly_02267_gene	gnl.Prokka.assembly_2[+]143437-144180	838	227.04	241.42	1092	428.83	465.22	771	345.11	366.45
assembly_01879_gene	gnl.Prokka.assembly_1[+]1727820-1728137	144	91.28	97.06	112	102.9	111.63	67	70.17	74.51
assembly_01399_gene	gnl.Prokka.assembly_1[+]1320446-1321414	2503	520.68	553.66	4332	1306.16	1417.01	3145	1080.88	1147.72
assembly_01499_gene	gnl.Prokka.assembly_1[+]1408561-1408770	110	105.58	112.27	137	190.6	206.78	116	183.95	195.33
assembly_00484_gene	gnl.Prokka.assembly_1[+]442635-443528	338	76.21	81.04	71	23.2	25.17	44	16.39	17.4
assembly_01325_gene	gnl.Prokka.assembly_1[-]1241027-1241350	84	52.26	55.57	49	44.19	47.94	50	51.39	54.57
assembly_00242_gene	gnl.Prokka.assembly_1[+]220952-221461	301	118.96	126.5	160	91.66	99.44	137	89.46	94.99
assembly_01331_gene	gnl.Prokka.assembly_1[-]1249906-1250778	1738	401.3	426.72	1287	430.73	467.28	963	367.36	390.08
assembly_01558_gene	gnl.Prokka.assembly_1[-]1461695-1464259	36770	2889.62	3072.66	24575	2799.23	3036.79	21674	2814.05	2988.06
assembly_00443_gene	gnl.Prokka.assembly_1[-]407105-408079	4074	842.27	895.62	2373	711.09	771.44	2166	739.83	785.58
assembly_00692_gene	gnl.Prokka.assembly_1[-]639930-640826	791	177.75	189.01	695	226.37	245.58	514	190.83	202.63
assembly_00665_gene	gnl.Prokka.assembly_1[+]617359-619221	418	45.23	48.09	257	40.3	43.72	242	43.26	45.93
assembly_01848_gene	gnl.Prokka.assembly_1[-]1699915-1700433	38	14.76	15.69	54	30.4	32.98	31	19.89	21.12
assembly_00747_gene	gnl.Prokka.assembly_1[-]689969-690724	26	6.93	7.37	19	7.35	7.97	10	4.41	4.68
assembly_02020_gene	gnl.Prokka.assembly_1[+]1857349-1857918	1471	520.2	553.15	671	343.94	373.13	557	325.44	345.56
assembly_00281_gene	gnl.Prokka.assembly_1[+]251506-252414	8149	1807.07	1921.54	7549	2426.37	2632.29	6786	2486.17	2639.9
assembly_01016_gene	gnl.Prokka.assembly_1[+]942226-943401	2316	396.97	422.12	1181	293.41	318.31	1229	348.04	369.56
assembly_01375_gene	gnl.Prokka.assembly_1[+]1294206-1294412	49	47.72	50.74	20	28.22	30.62	28	45.04	47.83
assembly_00534_gene	gnl.Prokka.assembly_1[-]482848-484104	1272	203.98	216.9	625	145.27	157.6	487	129.02	137
assembly_02303_gene	gnl.Prokka.assembly_2[-]177113-178516	27	3.87	4.12	29	6.04	6.55	15	3.56	3.78
assembly_00709_gene	gnl.Prokka.assembly_1[+]656354-656956	405	135.38	143.96	305	147.78	160.32	220	121.51	129.02
assembly_02367_gene	gnl.Prokka.assembly_2[+]233121-234608	889	120.43	128.06	429	84.23	91.38	398	89.07	94.58
assembly_02283_gene	gnl.Prokka.assembly_2[+]159035-159436	24	12.04	12.8	30	21.8	23.65	14	11.6	12.32
assembly_00107_gene	gnl.Prokka.assembly_1[+]96583-97758	5080	870.74	925.9	3741	929.42	1008.3	3602	1020.04	1083.11
assembly_01416_gene	gnl.Prokka.assembly_1[+]1338925-1339218	7158	4907.7	5218.58	6672	6630.42	7193.12	6840	7747.99	8227.1
assembly_01118_gene	gnl.Prokka.assembly_1[+]1042378-1042953	381	133.33	141.78	189	95.86	104	162	93.67	99.46
assembly_00387_gene	gnl.Prokka.assembly_1[+]352340-354670	1645	142.25	151.26	476	59.67	64.73	403	57.58	61.14
assembly_01539_gene	gnl.Prokka.assembly_1[-]1448190-1448318	1	1.56	1.66	0	0	0	1	2.58	2.74
assembly_00076_gene	gnl.Prokka.assembly_1[-]68246-69403	1753	305.15	324.48	940	237.16	257.29	809	232.66	247.05
assembly_00364_gene	gnl.Prokka.assembly_1[-]332803-333153	3634	2086.95	2219.15	1425	1186.15	1286.82	1807	1714.47	1820.49
assembly_00505_gene	gnl.Prokka.assembly_1[+]460651-461997	294	43.99	46.78	270	58.56	63.53	136	33.62	35.7
assembly_02341_gene	gnl.Prokka.assembly_2[-]213631-214599	529	110.04	117.01	249	75.08	81.45	192	65.99	70.07
assembly_01541_gene	gnl.Prokka.assembly_1[-]1448874-1450208	1184	178.78	190.1	880	192.59	208.93	783	195.32	207.4
assembly_00041_gene	gnl.Prokka.assembly_1[+]39933-41372	507	70.97	75.47	252	51.13	55.47	182	42.09	44.69
assembly_02138_gene	gnl.Prokka.assembly_2[+]55266-55469	1	0.99	1.05	0	0	0	0	0	0
assembly_02165_gene	gnl.Prokka.assembly_2[-]75126-76172	124	23.88	25.39	376	104.93	113.83	180	57.25	60.79
assembly_02174_gene	gnl.Prokka.assembly_2[-]81386-82375	5	1.02	1.08	4	1.18	1.28	1	0.34	0.36
assembly_01666_gene	gnl.Prokka.assembly_1[-]1558542-1559501	2182	458.16	487.18	1287	391.69	424.93	1072	371.88	394.88
assembly_01363_gene	gnl.Prokka.assembly_1[-]1282904-1283248	153	89.4	95.06	83	70.29	76.25	109	105.21	111.72
assembly_01366_gene	gnl.Prokka.assembly_1[-]1285995-1286471	1056	446.25	474.52	600	367.51	398.7	575	401.45	426.27
assembly_01181_gene	gnl.Prokka.assembly_1[+]1106834-1107508	381	113.77	120.98	218	94.36	102.37	214	105.58	112.11
assembly_02018_gene	gnl.Prokka.assembly_1[+]1855002-1856114	1216	220.23	234.18	837	219.71	238.36	805	240.87	255.76
assembly_02337_gene	gnl.Prokka.assembly_2[-]209675-209764	4	8.96	9.53	0	0	0	2	7.4	7.86
assembly_01330_gene	gnl.Prokka.assembly_1[-]1248315-1249817	6279	842.11	895.45	4105	797.97	865.69	3987	883.42	938.05
assembly_00612_gene	gnl.Prokka.assembly_1[+]562831-564246	1640	233.46	248.25	942	194.36	210.86	851	200.14	212.52
assembly_01030_gene	gnl.Prokka.assembly_1[+]956795-958132	628	94.61	100.6	188	41.06	44.54	175	43.56	46.25
assembly_01251_gene	gnl.Prokka.assembly_1[-]1176170-1176529	506	283.32	301.27	350	284.05	308.16	232	214.62	227.89
assembly_01093_gene	gnl.Prokka.assembly_1[+]1023724-1024899	496	85.01	90.4	153	38.01	41.24	204	57.77	61.34
assembly_00118_gene	gnl.Prokka.assembly_1[+]111401-111904	166	66.39	70.6	85	49.28	53.46	51	33.7	35.78
assembly_01231_gene	gnl.Prokka.assembly_1[+]1152836-1153600	283	74.57	79.29	119	45.45	49.31	117	50.93	54.08
assembly_01407_gene	gnl.Prokka.assembly_1[-]1328872-1330044	318	54.65	58.11	115	28.64	31.07	98	27.82	29.54
assembly_00324_gene	gnl.Prokka.assembly_1[-]296825-297364	2663	994.06	1057.03	2329	1260.11	1367.05	2028	1250.7	1328.04
assembly_01727_gene	gnl.Prokka.assembly_1[-]1611550-1611885	816	489.54	520.55	471	409.55	444.31	394	390.51	414.66
assembly_00498_gene	gnl.Prokka.assembly_1[+]453916-454107	577	605.77	644.14	325	494.56	536.53	361	626.16	664.88
assembly_01641_gene	gnl.Prokka.assembly_1[+]1532738-1534165	952	134.38	142.89	1091	223.22	242.16	548	127.8	135.7
assembly_00205_gene	gnl.Prokka.assembly_1[-]181837-182772	1758	378.6	402.58	1050	327.75	355.57	1085	386.04	409.91
assembly_00314_gene	gnl.Prokka.assembly_1[+]285790-286644	741	174.69	185.76	304	103.88	112.7	280	109.07	115.81
assembly_00994_gene	gnl.Prokka.assembly_1[-]923692-924327	1511	478.89	509.23	1225	562.74	610.5	1160	607.41	644.97
assembly_01917_gene	gnl.Prokka.assembly_1[-]1763284-1764468	1752	298.02	316.9	965	237.93	258.12	817	229.6	243.8
assembly_02259_gene	gnl.Prokka.assembly_2[-]137278-138288	558	111.25	118.3	421	121.66	131.99	381	125.5	133.26
assembly_02188_gene	gnl.Prokka.assembly_2[+]93055-93276	3	2.73	2.9	1	1.32	1.43	0	0	0
assembly_00373_gene	gnl.Prokka.assembly_1[-]340618-340977	731	409.3	435.23	400	324.63	352.18	425	393.16	417.47
assembly_00846_gene	gnl.Prokka.assembly_1[-]786471-786950	948	398.11	423.33	519	315.91	342.72	533	369.8	392.67
assembly_01897_gene	gnl.Prokka.assembly_1[+]1741375-1742454	1260	235.17	250.07	814	220.21	238.9	703	216.78	230.18
assembly_00605_gene	gnl.Prokka.assembly_1[+]549374-551026	12078	1472.84	1566.14	4561	806.15	874.57	4602	927.16	984.49
assembly_00352_gene	gnl.Prokka.assembly_1[+]323339-323623	16	11.31	12.03	17	17.43	18.91	18	21.03	22.33
assembly_01320_gene	gnl.Prokka.assembly_1[-]1234922-1237915	9501	639.66	680.18	5911	576.82	625.77	4858	540.37	573.78
assembly_01735_gene	gnl.Prokka.assembly_1[-]1618788-1619231	4088	1855.93	1973.49	2006	1320.01	1432.04	1759	1319.36	1400.94
assembly_00081_gene	gnl.Prokka.assembly_1[-]72371-72796	11	5.2	5.53	29	19.89	21.58	10	7.82	8.3
assembly_00084_gene	gnl.Prokka.assembly_1[-]77141-77629	111	45.75	48.65	102	60.94	66.11	57	38.82	41.22
assembly_02170_gene	gnl.Prokka.assembly_2[-]79190-79303	4	7.07	7.52	9	23.06	25.02	3	8.77	9.31
assembly_01904_gene	gnl.Prokka.assembly_1[-]1746832-1747866	4299	837.26	890.3	3028	854.77	927.31	2816	906.09	962.12
assembly_01176_gene	gnl.Prokka.assembly_1[+]1100479-1101579	348	63.71	67.75	215	57.06	61.9	156	47.18	50.1
assembly_00682_gene	gnl.Prokka.assembly_1[+]629485-630879	2943	425.25	452.19	2146	449.46	487.6	1850	441.65	468.96
assembly_01710_gene	gnl.Prokka.assembly_1[+]1592739-1593500	382	101.05	107.45	249	95.47	103.57	150	65.56	69.61
assembly_00976_gene	gnl.Prokka.assembly_1[+]908631-909029	1072	541.57	575.88	619	453.26	491.73	563	469.91	498.97
assembly_01966_gene	gnl.Prokka.assembly_1[-]1813269-1813961	1020	296.69	315.48	594	250.43	271.68	566	272	288.82
assembly_00005_gene	gnl.Prokka.assembly_1[-]5473-6459	1911	390.28	415	1088	322.07	349.4	821	277.02	294.15
assembly_00162_gene	gnl.Prokka.assembly_1[-]143019-143993	8198	1694.87	1802.23	6031	1807.24	1960.62	5832	1992.02	2115.2
assembly_00186_gene	gnl.Prokka.assembly_1[-]162505-163632	2582	461.4	490.63	3055	791.29	858.44	2557	754.92	801.6
assembly_00117_gene	gnl.Prokka.assembly_1[+]110300-111364	481	91.04	96.81	298	81.75	88.69	285	89.12	94.63
assembly_00051_gene	gnl.Prokka.assembly_1[-]46150-46707	388	140.16	149.04	189	98.96	107.36	157	93.71	99.5
assembly_00917_gene	gnl.Prokka.assembly_1[-]853963-854709	259	69.89	74.32	76	29.73	32.25	99	44.14	46.87
assembly_00435_gene	gnl.Prokka.assembly_1[-]399242-400252	415	82.74	87.98	331	95.65	103.77	217	71.48	75.9
assembly_02081_gene	gnl.Prokka.assembly_2[+]2852-4762	273	28.8	30.62	94	14.37	15.59	92	16.03	17.02
assembly_00880_gene	gnl.Prokka.assembly_1[+]815963-816862	3027	677.96	720.9	1625	527.52	572.29	1512	559.48	594.08
assembly_00641_gene	gnl.Prokka.assembly_1[+]592649-593575	6850	1489.52	1583.87	2686	846.56	918.41	2645	950.22	1008.98
assembly_00159_gene	gnl.Prokka.assembly_1[-]139809-141194	8942	1300.48	1382.86	6110	1287.98	1397.29	5390	1295.11	1375.19
assembly_00094_gene	gnl.Prokka.assembly_1[+]84610-85125	1079	421.51	448.21	503	284.81	308.98	513	331.1	351.57
assembly_01364_gene	gnl.Prokka.assembly_1[-]1283365-1285221	2711	294.27	312.91	1937	304.76	330.62	1767	316.89	336.48
assembly_00767_gene	gnl.Prokka.assembly_1[+]708961-710076	3425	618.63	657.82	2485	650.57	705.78	1937	578.03	613.77
assembly_01669_gene	gnl.Prokka.assembly_1[-]1560808-1561233	60	28.39	30.19	20	13.72	14.88	21	16.41	17.43
assembly_00214_gene	gnl.Prokka.assembly_1[+]195982-196521	1570	586.06	623.18	876	473.96	514.18	780	481.04	510.79
assembly_00431_gene	gnl.Prokka.assembly_1[-]394057-394740	607	178.88	190.21	325	138.82	150.6	272	132.43	140.62
assembly_02294_gene	gnl.Prokka.assembly_2[+]167902-168894	407	82.62	87.85	306	90.03	97.67	239	80.15	85.11
assembly_00666_gene	gnl.Prokka.assembly_1[+]619218-619958	75	20.4	21.69	36	14.2	15.4	24	10.78	11.45
assembly_01883_gene	gnl.Prokka.assembly_1[-]1731851-1732180	294	179.58	190.96	165	146.08	158.48	183	184.68	196.1
assembly_01171_gene	gnl.Prokka.assembly_1[+]1096010-1096852	1512	361.54	384.44	1149	398.22	432.02	1146	452.73	480.72
assembly_00447_gene	gnl.Prokka.assembly_1[+]411130-411447	41	25.99	27.64	10	9.19	9.97	16	16.75	17.79
assembly_00128_gene	gnl.Prokka.assembly_1[-]120519-121622	2358	430.54	457.81	1251	331.07	359.17	1071	323.07	343.05
assembly_00294_gene	gnl.Prokka.assembly_1[-]268124-269407	949	148.98	158.42	578	131.52	142.68	473	122.68	130.27
assembly_00905_gene	gnl.Prokka.assembly_1[-]842792-843604	477	118.27	125.76	326	117.16	127.1	221	90.53	96.13
assembly_01607_gene	gnl.Prokka.assembly_1[+]1508600-1508743	0	0	0	1	2.03	2.2	1	2.32	2.46
assembly_00774_gene	gnl.Prokka.assembly_1[-]715686-716501	506	124.99	132.91	238	85.22	92.45	200	81.62	86.67
assembly_01959_gene	gnl.Prokka.assembly_1[+]1806618-1807247	1114	356.43	379.01	634	294.03	318.98	488	257.97	273.92
assembly_00323_gene	gnl.Prokka.assembly_1[-]296541-296828	1350	944.88	1004.73	1018	1032.73	1120.38	887	1025.68	1089.1
assembly_01173_gene	gnl.Prokka.assembly_1[-]1097237-1098670	817	114.85	122.12	585	119.19	129.3	485	112.64	119.6
assembly_02401_gene	gnl.Prokka.assembly_2[+]246226-247380	983	171.55	182.42	688	174.04	188.81	578	166.65	176.96
assembly_00212_gene	gnl.Prokka.assembly_1[+]189065-195268	7167	232.86	247.61	4226	199.02	215.91	3779	202.86	215.4
assembly_01451_gene	gnl.Prokka.assembly_1[+]1366791-1369064	24567	2177.68	2315.63	12871	1653.69	1794.03	12209	1788.01	1898.57
assembly_00920_gene	gnl.Prokka.assembly_1[+]855861-856304	270	122.58	130.34	264	173.72	188.46	223	167.27	177.61
assembly_01386_gene	gnl.Prokka.assembly_1[+]1305776-1306174	100	50.52	53.72	69	50.52	54.81	66	55.08	58.49
assembly_00716_gene	gnl.Prokka.assembly_1[+]661903-662379	187	79.02	84.03	85	52.06	56.48	69	48.17	51.15
assembly_01042_gene	gnl.Prokka.assembly_1[-]967709-968956	1458	235.49	250.41	974	228.02	247.37	837	223.35	237.16
assembly_02019_gene	gnl.Prokka.assembly_1[+]1856111-1857352	3532	573.24	609.55	1918	451.19	489.48	1927	516.7	548.65
assembly_01828_gene	gnl.Prokka.assembly_1[+]1683670-1684335	486	147.09	156.41	263	115.38	125.17	279	139.51	148.14
assembly_00878_gene	gnl.Prokka.assembly_1[+]814632-815165	400	151	160.56	243	132.96	144.24	191	119.11	126.48
assembly_01471_gene	gnl.Prokka.assembly_1[-]1384532-1386463	7365	768.42	817.1	5472	827.5	897.73	4131	712.08	756.11
assembly_01437_gene	gnl.Prokka.assembly_1[+]1355968-1356765	1836	463.77	493.15	893	326.95	354.7	803	335.12	355.84
assembly_01281_gene	gnl.Prokka.assembly_1[-]1198759-1199772	1297	257.83	274.16	864	248.94	270.07	682	223.99	237.84
assembly_00064_gene	gnl.Prokka.assembly_1[-]56462-56905	3134	1422.82	1512.95	3580	2355.76	2555.69	3150	2362.7	2508.8
assembly_00204_gene	gnl.Prokka.assembly_1[-]181387-181800	443	215.7	229.36	404	285.11	309.31	308	247.76	263.08
assembly_00086_gene	gnl.Prokka.assembly_1[-]78532-79368	599	144.25	153.39	640	223.4	242.36	516	205.3	218
assembly_01625_gene	gnl.Prokka.assembly_1[-]1519486-1520448	71	14.86	15.8	54	16.38	17.77	52	17.98	19.09
assembly_01012_gene	gnl.Prokka.assembly_1[-]938205-939056	522	123.5	131.32	228	78.18	84.82	209	81.7	86.75
assembly_01273_gene	gnl.Prokka.assembly_1[-]1191872-1192645	319	83.08	88.34	137	51.71	56.1	135	58.09	61.68
assembly_00253_gene	gnl.Prokka.assembly_1[+]230236-230703	998	429.85	457.08	451	281.56	305.45	355	252.62	268.24
assembly_02347_gene	gnl.Prokka.assembly_2[-]218954-219418	8	3.47	3.69	7	4.4	4.77	4	2.86	3.04
assembly_01724_gene	gnl.Prokka.assembly_1[+]1606887-1607540	790	243.5	258.92	596	266.25	288.85	468	238.31	253.05
assembly_00453_gene	gnl.Prokka.assembly_1[-]416191-417108	1861	408.64	434.52	936	297.9	323.18	764	277.16	294.3
assembly_01017_gene	gnl.Prokka.assembly_1[+]943398-944177	380	98.2	104.42	148	55.44	60.14	165	70.44	74.8
assembly_01439_gene	gnl.Prokka.assembly_1[+]1358175-1358600	380	179.81	191.2	303	207.81	225.45	271	211.86	224.96
assembly_02123_gene	gnl.Prokka.assembly_2[+]44899-46044	1	0.18	0.19	1	0.26	0.28	0	0	0
assembly_00430_gene	gnl.Prokka.assembly_1[+]393765-394103	106	63.03	67.02	40	34.47	37.4	34	33.4	35.47
assembly_00152_gene	gnl.Prokka.assembly_1[+]134660-135301	1867	586.2	623.33	1406	639.86	694.16	1371	711.18	755.16
assembly_00301_gene	gnl.Prokka.assembly_1[+]274643-276400	1977	226.68	241.04	969	161.04	174.71	904	171.25	181.84
assembly_00349_gene	gnl.Prokka.assembly_1[-]321211-321885	542	161.86	172.11	253	109.51	118.8	157	77.46	82.25
assembly_02224_gene	gnl.Prokka.assembly_2[-]108897-110525	8	0.99	1.05	2	0.36	0.39	2	0.4	0.43
assembly_00184_gene	gnl.Prokka.assembly_1[-]160851-162203	4432	660.29	702.12	5301	1144.7	1241.85	5108	1257.28	1335.03
assembly_02250_gene	gnl.Prokka.assembly_2[+]129234-129452	0	0	0	2	2.66	2.89	4	6.08	6.46
assembly_00331_gene	gnl.Prokka.assembly_1[-]304448-305071	1898	613.12	651.96	2096	981.38	1064.67	1821	971.86	1031.96
assembly_00729_gene	gnl.Prokka.assembly_1[+]674267-674839	916	322.24	342.65	852	434.43	471.3	857	498.09	528.89
assembly_01081_gene	gnl.Prokka.assembly_1[+]1014385-1014714	172	105.06	111.72	112	99.16	107.58	96	96.88	102.87
assembly_00869_gene	gnl.Prokka.assembly_1[-]806823-807902	688	128.41	136.54	560	151.49	164.35	434	133.82	142.1
assembly_01865_gene	gnl.Prokka.assembly_1[-]1716536-1717015	1321	554.75	589.89	596	362.77	393.56	552	382.98	406.66
assembly_01614_gene	gnl.Prokka.assembly_1[+]1509561-1511360	539	60.36	64.18	475	77.1	83.64	262	48.47	51.47
assembly_00563_gene	gnl.Prokka.assembly_1[-]511895-512491	546	184.35	196.03	577	282.38	306.34	521	290.63	308.6
assembly_00345_gene	gnl.Prokka.assembly_1[-]311698-317100	49496	1846.59	1963.56	24132	1304.94	1415.69	17058	1051.41	1116.43
assembly_00003_gene	gnl.Prokka.assembly_1[+]2793-4061	3353	532.6	566.34	4835	1113.19	1207.66	3691	968.64	1028.54
assembly_01177_gene	gnl.Prokka.assembly_1[-]1101576-1103990	19036	1588.88	1689.53	10745	1299.94	1410.26	11541	1591.5	1689.91
assembly_01048_gene	gnl.Prokka.assembly_1[-]973879-974802	397	86.6	92.09	270	85.37	92.62	260	93.71	99.5
assembly_01802_gene	gnl.Prokka.assembly_1[+]1662783-1663067	121	85.58	91	195	199.9	216.87	229	267.59	284.14
assembly_00417_gene	gnl.Prokka.assembly_1[+]381822-383075	5108	821.08	873.09	4496	1047.52	1136.42	3253	863.91	917.33
assembly_01549_gene	gnl.Prokka.assembly_1[-]1456630-1457088	3082	1353.48	1439.22	1212	771.48	836.95	1343	974.42	1034.67
assembly_02125_gene	gnl.Prokka.assembly_2[-]46577-46993	93	44.95	47.8	76	53.25	57.77	64	51.11	54.27
assembly_00821_gene	gnl.Prokka.assembly_1[-]760160-760669	7	2.76	2.94	10	5.72	6.21	7	4.57	4.85
assembly_00867_gene	gnl.Prokka.assembly_1[-]804430-805893	275	37.86	40.26	154	30.73	33.34	150	34.12	36.23
assembly_02035_gene	gnl.Prokka.assembly_1[-]1870367-1870777	1972	967.17	1028.43	1390	988.11	1071.97	1248	1011.24	1073.77
assembly_02241_gene	gnl.Prokka.assembly_2[+]115381-115989	67	22.18	23.58	47	22.55	24.46	41	22.42	23.81
assembly_02155_gene	gnl.Prokka.assembly_2[+]66300-66863	1128	403.14	428.68	754	390.59	423.74	663	391.48	415.69
assembly_01180_gene	gnl.Prokka.assembly_1[+]1105899-1106837	256	54.96	58.44	207	64.4	69.87	198	70.23	74.57
assembly_02102_gene	gnl.Prokka.assembly_2[+]32287-32760	8	3.4	3.62	11	6.78	7.36	10	7.03	7.46
assembly_01844_gene	gnl.Prokka.assembly_1[-]1696587-1697198	522	171.93	182.82	388	185.23	200.95	801	435.88	462.83
assembly_00990_gene	gnl.Prokka.assembly_1[-]919546-920847	640	99.08	105.36	191	42.86	46.5	214	54.74	58.12
assembly_01318_gene	gnl.Prokka.assembly_1[+]1230460-1232997	481	38.2	40.62	166	19.11	20.73	150	19.68	20.9
assembly_00427_gene	gnl.Prokka.assembly_1[+]390763-391707	3158	673.62	716.29	1341	414.6	449.79	1138	401.04	425.84
assembly_00914_gene	gnl.Prokka.assembly_1[-]851025-853031	167	16.78	17.84	84	12.23	13.27	63	10.45	11.1
assembly_00995_gene	gnl.Prokka.assembly_1[-]924484-924957	494	210.08	223.39	370	228.06	247.42	341	239.59	254.4
assembly_00179_gene	gnl.Prokka.assembly_1[+]157340-157945	178	59.21	62.96	116	55.92	60.67	77	42.31	44.93
assembly_01404_gene	gnl.Prokka.assembly_1[+]1325952-1326962	1717	342.33	364.02	1517	438.39	475.6	1022	336.65	357.47
assembly_02243_gene	gnl.Prokka.assembly_2[+]116637-117431	1062	269.27	286.33	398	146.27	158.68	421	176.35	187.26
assembly_01522_gene	gnl.Prokka.assembly_1[-]1429858-1430556	3187	919.05	977.27	1880	785.8	852.49	1638	780.4	828.66
assembly_00654_gene	gnl.Prokka.assembly_1[-]604674-605003	600	366.49	389.71	316	279.78	303.52	285	287.62	305.4
assembly_00217_gene	gnl.Prokka.assembly_1[-]197485-197706	20650	18750	19937.7	11157	14683.4	15929.5	10929	16394.9	17408.7
assembly_00597_gene	gnl.Prokka.assembly_1[-]541362-542762	5199	748.03	795.41	3467	723.02	784.38	2940	698.86	742.07
assembly_01945_gene	gnl.Prokka.assembly_1[+]1793806-1794672	996	231.56	246.23	480	161.75	175.48	616	236.62	251.25
assembly_01931_gene	gnl.Prokka.assembly_1[+]1776489-1777631	810	142.85	151.9	604	154.39	167.49	438	127.62	135.51
assembly_01660_gene	gnl.Prokka.assembly_1[-]1551739-1552476	445	121.54	129.24	575	227.64	246.96	418	188.63	200.29
assembly_02145_gene	gnl.Prokka.assembly_2[-]59866-60108	167	138.53	147.31	87	104.6	113.48	76	104.16	110.6
assembly_01593_gene	gnl.Prokka.assembly_1[-]1496306-1497913	1846	231.41	246.07	1069	194.24	210.72	954	197.58	209.8
assembly_00562_gene	gnl.Prokka.assembly_1[-]511243-511770	10100	3855.86	4100.11	3364	1861.46	2019.44	5417	3416.69	3627.96
assembly_01218_gene	gnl.Prokka.assembly_1[+]1142118-1142249	353	539.05	573.2	155	343.07	372.19	165	416.29	442.03
assembly_00126_gene	gnl.Prokka.assembly_1[-]118555-119457	1254	279.93	297.66	756	244.6	265.36	560	206.53	219.3
assembly_02327_gene	gnl.Prokka.assembly_2[-]197992-199041	694	133.23	141.67	336	93.5	101.43	290	91.98	97.67
assembly_01334_gene	gnl.Prokka.assembly_1[-]1252856-1254067	910	151.34	160.93	841	202.73	219.94	623	171.18	181.77
assembly_00531_gene	gnl.Prokka.assembly_1[-]480958-482178	1200	198.11	210.66	624	149.32	161.99	502	136.92	145.39
assembly_01029_gene	gnl.Prokka.assembly_1[+]956431-956841	164	80.43	85.53	43	30.57	33.16	33	26.74	28.39
assembly_00308_gene	gnl.Prokka.assembly_1[+]281631-283586	4502	463.95	493.34	3275	489.18	530.7	2569	437.39	464.44
assembly_00158_gene	gnl.Prokka.assembly_1[+]139540-139812	30	22.15	23.55	21	22.47	24.38	15	18.3	19.43
assembly_00785_gene	gnl.Prokka.assembly_1[+]725008-726072	511	96.71	102.84	260	71.33	77.38	183	57.22	60.76
assembly_00243_gene	gnl.Prokka.assembly_1[+]221573-221896	12940	8050.5	8560.46	7674	6920.05	7507.33	6347	6523.85	6927.26
assembly_00970_gene	gnl.Prokka.assembly_1[-]904291-904725	513	237.72	252.78	396	265.98	288.55	362	277.14	294.28
assembly_01761_gene	gnl.Prokka.assembly_1[-]1633403-1633771	2677	1462.37	1555	7635	6045.26	6558.3	3754	3388.04	3597.54
assembly_00271_gene	gnl.Prokka.assembly_1[+]244868-245347	202	84.83	90.2	116	70.61	76.6	158	109.62	116.4
assembly_02038_gene	gnl.Prokka.assembly_1[+]1871634-1872230	459	154.98	164.8	293	143.39	155.56	274	152.85	162.3
assembly_01814_gene	gnl.Prokka.assembly_1[+]1670973-1671362	208	107.51	114.32	140	104.88	113.78	113	96.49	102.46
assembly_01452_gene	gnl.Prokka.assembly_1[+]1369123-1370274	1762	308.31	327.84	942	238.9	259.18	1021	295.16	313.41
assembly_01671_gene	gnl.Prokka.assembly_1[-]1561854-1563158	404	62.41	66.36	129	28.88	31.33	99	25.27	26.83
assembly_01705_gene	gnl.Prokka.assembly_1[-]1587611-1588201	13014	4438.71	4719.88	12958	6405.94	6949.59	12921	7280.97	7731.2
assembly_01020_gene	gnl.Prokka.assembly_1[+]946566-947306	622	169.2	179.92	44	17.35	18.82	122	54.83	58.22
assembly_00494_gene	gnl.Prokka.assembly_1[+]451857-452630	1299	338.3	359.73	590	222.71	241.61	545	234.5	249
assembly_01360_gene	gnl.Prokka.assembly_1[-]1280211-1280771	2718	976.61	1038.47	2418	1259.29	1366.16	2529	1501.3	1594.13
assembly_00693_gene	gnl.Prokka.assembly_1[-]640816-641892	1252	234.33	249.17	1183	320.92	348.16	875	270.57	287.3
assembly_01684_gene	gnl.Prokka.assembly_1[-]1572735-1574564	349	38.44	40.88	210	33.52	36.37	150	27.3	28.99
assembly_01915_gene	gnl.Prokka.assembly_1[-]1761718-1762740	2530	498.51	530.09	1706	487.23	528.58	1509	491.24	521.62
assembly_01264_gene	gnl.Prokka.assembly_1[-]1184989-1185567	386	134.38	142.89	232	117.07	127	175	100.66	106.88
assembly_01521_gene	gnl.Prokka.assembly_1[+]1429250-1429804	724	262.95	279.61	571	300.59	326.1	583	349.83	371.46
assembly_01365_gene	gnl.Prokka.assembly_1[-]1285312-1285995	2549	751.19	798.77	1371	585.62	635.32	1434	698.19	741.36
assembly_00183_gene	gnl.Prokka.assembly_1[-]160141-160662	2859	1104.03	1173.96	5624	3147.8	3414.94	2937	1873.76	1989.63
assembly_01229_gene	gnl.Prokka.assembly_1[-]1151725-1152138	151	73.52	78.18	70	49.4	53.59	69	55.51	58.94
assembly_01519_gene	gnl.Prokka.assembly_1[+]1427482-1427781	297	199.56	212.2	219	213.28	231.38	231	256.43	272.29
assembly_01220_gene	gnl.Prokka.assembly_1[-]1143508-1144881	555	81.42	86.58	268	56.98	61.82	251	60.84	64.6
assembly_01618_gene	gnl.Prokka.assembly_1[+]1515495-1515710	4	3.73	3.97	8	10.82	11.74	3	4.62	4.91
assembly_01805_gene	gnl.Prokka.assembly_1[+]1665695-1666372	234	69.57	73.98	124	53.44	57.97	153	75.15	79.8
assembly_01087_gene	gnl.Prokka.assembly_1[+]1018498-1019064	2	0.71	0.76	4	2.06	2.24	4	2.34	2.49
assembly_02310_gene	gnl.Prokka.assembly_2[-]183041-183904	7235	1687.95	1794.87	2078	702.69	762.33	1108	427.08	453.49
assembly_00476_gene	gnl.Prokka.assembly_1[+]434291-435019	164	45.35	48.22	158	63.33	68.7	85	38.83	41.23
assembly_01743_gene	gnl.Prokka.assembly_1[-]1624409-1625356	7753	1648.52	1752.95	12623	3890.33	4220.49	7663	2691.98	2858.44
assembly_02160_gene	gnl.Prokka.assembly_2[+]70465-71085	55	17.85	18.98	40	18.82	20.42	29	15.55	16.51
assembly_00735_gene	gnl.Prokka.assembly_1[+]679377-680153	1404	364.24	387.31	885	332.78	361.02	846	362.6	385.02
assembly_00741_gene	gnl.Prokka.assembly_1[-]683627-684736	6092	1106.29	1176.37	2770	729.1	790.98	2455	736.56	782.11
assembly_01942_gene	gnl.Prokka.assembly_1[-]1789502-1790890	919	133.36	141.81	663	139.45	151.29	584	140.02	148.68
assembly_00524_gene	gnl.Prokka.assembly_1[+]477136-477432	845	573.5	609.83	381	374.8	406.61	325	364.43	386.96
assembly_01577_gene	gnl.Prokka.assembly_1[-]1482911-1484083	1285	220.82	234.81	932	232.14	251.84	733	208.11	220.98
assembly_01514_gene	gnl.Prokka.assembly_1[+]1421868-1422848	2691	552.94	587.97	1383	411.89	446.85	1366	463.73	492.4
assembly_00572_gene	gnl.Prokka.assembly_1[+]519090-520307	2909	481.42	511.92	2118	508.05	551.17	2470	675.35	717.11
assembly_01160_gene	gnl.Prokka.assembly_1[-]1084243-1084755	399	156.78	166.71	324	184.53	200.19	309	200.6	213
assembly_00120_gene	gnl.Prokka.assembly_1[-]112792-113589	879	222.04	236.1	324	118.62	128.69	325	135.63	144.02
assembly_01811_gene	gnl.Prokka.assembly_1[-]1669353-1669979	59	18.97	20.17	39	18.18	19.72	31	16.46	17.48
assembly_02316_gene	gnl.Prokka.assembly_2[+]188922-189620	913	263.28	279.96	514	214.84	233.07	353	168.18	178.58
assembly_00802_gene	gnl.Prokka.assembly_1[-]744489-745163	2451	731.94	778.3	1159	501.67	544.24	1068	526.93	559.51
assembly_01068_gene	gnl.Prokka.assembly_1[-]1002162-1002776	92	30.15	32.06	126	59.86	64.94	76	41.16	43.7
assembly_00935_gene	gnl.Prokka.assembly_1[-]867254-867802	1127	413.8	440.01	597	317.72	344.68	546	331.21	351.69
assembly_00962_gene	gnl.Prokka.assembly_1[+]896627-897652	1155	226.92	241.29	722	205.6	223.05	667	216.5	229.89
assembly_00082_gene	gnl.Prokka.assembly_1[-]72848-74017	134	23.09	24.55	192	47.94	52.01	87	24.76	26.29
assembly_01744_gene	gnl.Prokka.assembly_1[-]1625375-1626004	3876	1240.16	1318.72	6081	2820.12	3059.45	3675	1942.66	2062.79
assembly_02289_gene	gnl.Prokka.assembly_2[+]163017-164300	236	37.05	39.4	106	24.12	26.17	77	19.97	21.21
assembly_01058_gene	gnl.Prokka.assembly_1[-]988492-989415	308	67.19	71.45	185	58.5	63.46	165	59.47	63.15
assembly_01073_gene	gnl.Prokka.assembly_1[+]1006083-1007339	259	41.53	44.16	125	29.05	31.52	119	31.53	33.48
assembly_00087_gene	gnl.Prokka.assembly_1[+]79509-81086	1247	159.29	169.38	837	154.97	168.12	743	156.8	166.5
assembly_01892_gene	gnl.Prokka.assembly_1[+]1736672-1737088	1340	647.74	688.77	740	518.48	562.48	655	523.1	555.45
assembly_01010_gene	gnl.Prokka.assembly_1[-]936632-937669	28621	5558.04	5910.11	10859	3056.5	3315.9	12171	3904.9	4146.36
assembly_00286_gene	gnl.Prokka.assembly_1[-]255540-256718	1135	194.05	206.34	609	150.91	163.72	598	168.91	179.36
assembly_01798_gene	gnl.Prokka.assembly_1[+]1656893-1657960	5492	1036.56	1102.22	2972	813.04	882.04	3176	990.35	1051.59
assembly_00102_gene	gnl.Prokka.assembly_1[+]93013-94215	654	109.59	116.53	707	171.71	186.28	631	174.68	185.48
assembly_02063_gene	gnl.Prokka.assembly_2[+]51-977	643	139.82	148.68	546	172.09	186.69	430	154.48	164.03
assembly_01908_gene	gnl.Prokka.assembly_1[-]1749049-1749651	1199	400.81	426.2	742	359.52	390.03	663	366.17	388.81
assembly_02034_gene	gnl.Prokka.assembly_1[-]1869786-1870370	5267	1814.85	1929.81	4438	2216.47	2404.58	3997	2275.41	2416.11
assembly_01730_gene	gnl.Prokka.assembly_1[-]1613494-1614822	13271	2012.86	2140.36	9298	2044.08	2217.55	7940	1989.65	2112.68
assembly_01647_gene	gnl.Prokka.assembly_1[-]1538618-1541368	4866	356.54	379.13	2957	314.05	340.7	2293	277.59	294.75
assembly_00732_gene	gnl.Prokka.assembly_1[+]675842-676780	323	69.34	73.73	296	92.1	99.92	311	110.3	117.12
assembly_00999_gene	gnl.Prokka.assembly_1[+]927671-928186	0	0	0	0	0	0	0	0	0
assembly_02220_gene	gnl.Prokka.assembly_2[-]105762-106175	77	37.49	39.87	29	20.46	22.2	49	39.41	41.85
assembly_01453_gene	gnl.Prokka.assembly_1[+]1370299-1370853	664	241.16	256.44	356	187.41	203.31	308	184.81	196.24
assembly_02284_gene	gnl.Prokka.assembly_2[-]159505-160239	68	18.65	19.83	14	5.57	6.04	13	5.89	6.25
assembly_00537_gene	gnl.Prokka.assembly_1[-]486597-488159	542	69.9	74.33	359	67.1	72.8	236	50.28	53.39
assembly_00676_gene	gnl.Prokka.assembly_1[+]625594-625755	568	706.75	751.52	262	472.52	512.62	258	530.37	563.17
assembly_00149_gene	gnl.Prokka.assembly_1[+]131863-132309	7993	3604.43	3832.75	11101	7255.82	7871.6	8471	6311.14	6701.4
assembly_00683_gene	gnl.Prokka.assembly_1[+]630869-631171	408	271.43	288.62	271	261.31	283.49	229	251.7	267.26
assembly_00608_gene	gnl.Prokka.assembly_1[+]559371-560402	467	91.21	96.99	338	95.69	103.81	293	94.55	100.4
assembly_01088_gene	gnl.Prokka.assembly_1[+]1019030-1019314	5	3.54	3.76	2	2.05	2.22	2	2.34	2.48
assembly_00287_gene	gnl.Prokka.assembly_1[+]257437-260460	1781	118.72	126.24	978	94.49	102.51	729	80.29	85.25
assembly_00462_gene	gnl.Prokka.assembly_1[+]424015-424632	142	46.32	49.25	100	47.28	51.29	51	27.48	29.18
assembly_02313_gene	gnl.Prokka.assembly_2[+]185457-186308	74	17.51	18.62	34	11.66	12.65	12	4.69	4.98
assembly_02279_gene	gnl.Prokka.assembly_2[+]151691-153709	2481	247.7	263.39	1073	155.27	168.45	1038	171.21	181.8
assembly_00645_gene	gnl.Prokka.assembly_1[-]596821-597276	330	145.88	155.12	211	135.19	146.66	264	192.81	204.73
assembly_01693_gene	gnl.Prokka.assembly_1[-]1578948-1579484	2240	840.83	894.09	1590	865.07	938.49	1309	811.79	861.99
assembly_02248_gene	gnl.Prokka.assembly_2[+]124863-126125	226	36.07	38.35	79	18.28	19.83	52	13.71	14.56
assembly_00627_gene	gnl.Prokka.assembly_1[-]578222-579097	119	27.39	29.12	102	34.02	36.91	88	33.45	35.52
assembly_00330_gene	gnl.Prokka.assembly_1[-]303222-304451	6250	1024.26	1089.14	6287	1493.38	1620.12	5412	1465.32	1555.93
assembly_01392_gene	gnl.Prokka.assembly_1[-]1310877-1313312	1026	84.9	90.28	695	83.36	90.43	553	75.6	80.28
assembly_02199_gene	gnl.Prokka.assembly_2[+]95990-96973	291	59.61	63.39	81	24.05	26.09	105	35.53	37.73
assembly_01436_gene	gnl.Prokka.assembly_1[-]1355206-1355961	113	30.13	32.04	84	32.46	35.22	61	26.87	28.53
assembly_00201_gene	gnl.Prokka.assembly_1[+]179406-180251	143	34.07	36.23	138	47.66	51.7	108	42.51	45.14
assembly_02182_gene	gnl.Prokka.assembly_2[-]88420-88797	2	1.06	1.13	3	2.32	2.52	4	3.52	3.74
assembly_02264_gene	gnl.Prokka.assembly_2[+]140862-141560	900	259.54	275.98	1343	561.35	608.99	957	455.95	484.14
assembly_01244_gene	gnl.Prokka.assembly_1[-]1168908-1169753	890	212.06	225.49	344	118.8	128.88	334	131.48	139.61
assembly_01627_gene	gnl.Prokka.assembly_1[-]1522306-1523229	1622	353.85	376.26	690	218.17	236.69	653	235.36	249.91
assembly_00108_gene	gnl.Prokka.assembly_1[-]97816-99447	2565	316.81	336.88	5633	1008.45	1094.03	4074	831.34	882.75
assembly_01784_gene	gnl.Prokka.assembly_1[+]1648007-1648699	3152	916.82	974.9	1775	748.34	811.85	2032	976.5	1036.88
assembly_00442_gene	gnl.Prokka.assembly_1[-]406077-407108	994	194.15	206.45	344	97.39	105.65	303	97.77	103.82
assembly_00992_gene	gnl.Prokka.assembly_1[-]922055-923329	2802	442.99	471.05	1579	361.83	392.54	1530	399.64	424.35
assembly_01059_gene	gnl.Prokka.assembly_1[+]989435-990421	523	106.81	113.58	200	59.21	64.23	193	65.12	69.15
assembly_01493_gene	gnl.Prokka.assembly_1[+]1401550-1402161	80	26.35	28.02	36	17.18	18.64	34	18.51	19.65
assembly_00778_gene	gnl.Prokka.assembly_1[+]720483-720800	1573	997.09	1060.25	827	759.82	824.3	740	774.97	822.89
assembly_02151_gene	gnl.Prokka.assembly_2[+]62553-62954	113	56.66	60.25	823	598.15	648.91	271	224.51	238.39
assembly_01546_gene	gnl.Prokka.assembly_1[-]1454166-1454993	7751	1886.95	2006.48	3508	1237.83	1342.88	3793	1525.57	1619.91
assembly_00900_gene	gnl.Prokka.assembly_1[-]837100-838719	2946	366.57	389.79	1746	314.9	341.62	1413	290.48	308.44
assembly_02141_gene	gnl.Prokka.assembly_2[-]56811-56945	160	238.91	254.04	90	194.78	211.31	89	219.55	233.13
assembly_01588_gene	gnl.Prokka.assembly_1[+]1490369-1491052	3348	986.65	1049.15	2392	1021.73	1108.44	2190	1066.28	1132.21
assembly_00182_gene	gnl.Prokka.assembly_1[-]159750-160127	1080	575.93	612.41	2409	1861.99	2020.01	1402	1235.2	1311.58
assembly_00803_gene	gnl.Prokka.assembly_1[-]745151-746002	3612	854.56	908.69	1739	596.34	646.95	1524	595.69	632.53
assembly_02353_gene	gnl.Prokka.assembly_2[+]223097-223501	40	19.91	21.17	23	16.59	18	14	11.51	12.22
assembly_02285_gene	gnl.Prokka.assembly_2[-]160249-161013	102	26.88	28.58	5	1.91	2.07	5	2.18	2.31
assembly_00478_gene	gnl.Prokka.assembly_1[-]437173-437742	1053	372.38	395.97	495	253.73	275.26	469	274.02	290.96
assembly_02275_gene	gnl.Prokka.assembly_2[+]149755-150174	598	287	305.18	567	394.43	427.9	458	363.16	385.62
assembly_00284_gene	gnl.Prokka.assembly_1[+]254457-255344	4766	1081.87	1150.4	2968	976.53	1059.4	2864	1074.09	1140.51
assembly_00040_gene	gnl.Prokka.assembly_1[-]39192-39884	1216	353.7	376.1	727	306.5	332.51	618	296.99	315.35
assembly_02022_gene	gnl.Prokka.assembly_1[-]1858798-1860060	9203	1468.79	1561.83	8680	2007.93	2178.34	6837	1802.78	1914.26
assembly_00371_gene	gnl.Prokka.assembly_1[-]339003-339686	130	38.31	40.74	60	25.63	27.8	68	33.11	35.16
assembly_01091_gene	gnl.Prokka.assembly_1[-]1021401-1022969	280	35.97	38.25	151	28.11	30.5	122	25.9	27.5
assembly_01706_gene	gnl.Prokka.assembly_1[+]1588272-1589048	186	48.25	51.31	133	50.01	54.25	120	51.43	54.61
assembly_01211_gene	gnl.Prokka.assembly_1[+]1135578-1136321	1346	364.68	387.78	1101	432.36	469.05	1109	496.4	527.1
assembly_00177_gene	gnl.Prokka.assembly_1[+]155394-155741	217	125.7	133.66	161	135.17	146.64	138	132.06	140.23
assembly_01649_gene	gnl.Prokka.assembly_1[-]1542508-1542729	232	210.66	224	85	111.87	121.36	105	157.51	167.25
assembly_00197_gene	gnl.Prokka.assembly_1[-]175164-176663	1858	249.68	265.5	1366	266.07	288.65	1000	222.02	235.75
assembly_02247_gene	gnl.Prokka.assembly_2[+]122815-124863	492	48.4	51.47	183	26.1	28.31	144	23.4	24.85
assembly_01678_gene	gnl.Prokka.assembly_1[+]1570472-1570789	234	148.32	157.72	142	130.47	141.54	105	109.96	116.76
assembly_00066_gene	gnl.Prokka.assembly_1[+]58004-59107	496	90.56	96.3	298	78.87	85.56	249	75.12	79.76
assembly_01765_gene	gnl.Prokka.assembly_1[-]1634712-1635431	1721	481.82	512.34	4106	1666.17	1807.57	1840	851.07	903.7
assembly_00866_gene	gnl.Prokka.assembly_1[+]803382-804329	293	62.3	66.25	124	38.22	41.46	106	37.24	39.54
assembly_01151_gene	gnl.Prokka.assembly_1[+]1075916-1076935	1002	198.02	210.56	542	155.25	168.43	456	148.88	158.09
assembly_01912_gene	gnl.Prokka.assembly_1[-]1758509-1758937	928	436.04	463.66	490	333.71	362.03	446	346.22	367.63
assembly_00189_gene	gnl.Prokka.assembly_1[+]165451-166590	674	119.18	126.73	437	112	121.5	342	99.91	106.09
assembly_00305_gene	gnl.Prokka.assembly_1[+]278566-279777	2057	342.11	363.78	1133	273.12	296.3	950	261.04	277.18
assembly_00646_gene	gnl.Prokka.assembly_1[-]597289-598419	410	73.07	77.7	204	52.7	57.17	305	89.81	95.36
assembly_00195_gene	gnl.Prokka.assembly_1[+]173472-173951	985	413.65	439.85	419	255.04	276.68	390	270.59	287.32
assembly_02348_gene	gnl.Prokka.assembly_2[+]219941-220501	32	11.5	12.23	15	7.81	8.47	14	8.31	8.82
assembly_00017_gene	gnl.Prokka.assembly_1[-]17731-18816	4668	866.44	921.32	3334	896.95	973.07	3129	959.53	1018.86
assembly_01636_gene	gnl.Prokka.assembly_1[-]1529429-1530040	559	184.12	195.78	372	177.59	192.66	247	134.41	142.72
assembly_01701_gene	gnl.Prokka.assembly_1[+]1585075-1585767	1250	363.59	386.62	640	269.82	292.72	618	296.99	315.35
assembly_00809_gene	gnl.Prokka.assembly_1[+]751830-752684	2016	475.29	505.4	6599	2254.99	2446.36	3682	1434.17	1522.85
assembly_01287_gene	gnl.Prokka.assembly_1[+]1204341-1205042	19	5.45	5.8	6	2.5	2.71	6	2.84	3.02
assembly_02004_gene	gnl.Prokka.assembly_1[-]1846174-1846740	1545	549.26	584.05	1135	584.85	634.48	1036	608.49	646.12
assembly_01680_gene	gnl.Prokka.assembly_1[+]1571377-1571760	508	266.67	283.56	266	202.38	219.56	267	231.56	245.88
assembly_01685_gene	gnl.Prokka.assembly_1[+]1574608-1575336	737	203.78	216.69	727	291.36	316.09	581	265.42	281.83
assembly_01455_gene	gnl.Prokka.assembly_1[-]1371923-1373293	398	58.51	62.22	306	65.21	70.74	213	51.74	54.94
assembly_00226_gene	gnl.Prokka.assembly_1[+]204189-204902	118	33.31	35.42	46	18.82	20.42	40	18.66	19.81
assembly_00566_gene	gnl.Prokka.assembly_1[-]514354-514866	444	174.46	185.51	273	155.48	168.68	273	177.22	188.18
assembly_01530_gene	gnl.Prokka.assembly_1[-]1436903-1437274	1740	942.85	1002.57	1140	895.35	971.34	1140	1020.57	1083.68
assembly_01191_gene	gnl.Prokka.assembly_1[-]1114268-1114822	956	347.22	369.21	758	399.04	432.9	717	430.24	456.84
assembly_00936_gene	gnl.Prokka.assembly_1[-]867799-868185	806	419.82	446.41	481	363.13	393.95	503	432.85	459.62
assembly_00647_gene	gnl.Prokka.assembly_1[-]598412-598987	511	178.82	190.15	160	81.16	88.05	237	137.03	145.5
assembly_01089_gene	gnl.Prokka.assembly_1[+]1020624-1020944	223	140.03	148.9	58	52.79	57.27	63	65.36	69.4
assembly_01586_gene	gnl.Prokka.assembly_1[+]1489417-1490106	1596	466.25	495.78	1060	448.84	486.93	1073	517.89	549.91
assembly_01677_gene	gnl.Prokka.assembly_1[-]1569461-1570459	1305	263.32	280	804	235.13	255.09	649	216.35	229.73
assembly_01253_gene	gnl.Prokka.assembly_1[-]1176700-1176825	12	19.19	20.41	5	11.6	12.58	6	15.86	16.84
assembly_01061_gene	gnl.Prokka.assembly_1[+]991074-992042	4632	963.56	1024.6	2179	657	712.76	1266	435.1	462.01
assembly_00955_gene	gnl.Prokka.assembly_1[-]885218-885796	517	179.99	191.39	413	208.4	226.09	309	177.73	188.72
assembly_00525_gene	gnl.Prokka.assembly_1[-]477405-477743	735	437.04	464.72	428	368.87	400.18	362	355.62	377.61
assembly_01751_gene	gnl.Prokka.assembly_1[-]1628516-1629832	11687	1788.75	1902.06	29179	6473.16	7022.52	16711	4225.69	4486.99
assembly_01200_gene	gnl.Prokka.assembly_1[+]1120440-1120946	4219	1677.4	1783.65	5737	3306.05	3586.62	6116	4017.35	4265.77
assembly_01548_gene	gnl.Prokka.assembly_1[-]1456160-1456633	1543	656.17	697.74	606	373.53	405.23	646	453.87	481.94
assembly_01279_gene	gnl.Prokka.assembly_1[-]1196586-1197113	481	183.63	195.26	556	307.66	333.77	350	220.76	234.41
assembly_00762_gene	gnl.Prokka.assembly_1[-]706427-706702	420	306.74	326.17	423	447.78	485.78	347	418.7	444.59
assembly_02101_gene	gnl.Prokka.assembly_2[+]26868-32255	43	1.61	1.71	49	2.65	2.88	43	2.66	2.82
assembly_01344_gene	gnl.Prokka.assembly_1[-]1264003-1264302	2330	1565.56	1664.73	2047	1993.55	2162.74	2350	2608.72	2770.03
assembly_00899_gene	gnl.Prokka.assembly_1[+]836460-837092	1573	500.91	532.64	2021	932.81	1011.98	2059	1083.27	1150.25
assembly_00080_gene	gnl.Prokka.assembly_1[-]72084-72338	3	2.37	2.52	2	2.3	2.49	0	0	0
assembly_00256_gene	gnl.Prokka.assembly_1[+]231616-232743	361	64.51	68.6	257	66.57	72.22	195	57.57	61.13
assembly_00131_gene	gnl.Prokka.assembly_1[-]124011-124454	2058	934.33	993.51	3018	1985.95	2154.49	3045	2283.94	2425.17
assembly_02087_gene	gnl.Prokka.assembly_2[+]9186-10271	322	59.76	63.55	162	43.58	47.28	136	41.7	44.28
assembly_00931_gene	gnl.Prokka.assembly_1[-]864185-864775	3329	1135.43	1207.35	2817	1392.61	1510.8	2379	1340.56	1423.46
assembly_02052_gene	gnl.Prokka.assembly_1[-]1884912-1885880	2788	579.96	616.7	3115	939.22	1018.93	2272	780.85	829.13
assembly_01184_gene	gnl.Prokka.assembly_1[+]1110087-1110290	42	41.5	44.13	29	41.54	45.06	22	35.92	38.14
assembly_01166_gene	gnl.Prokka.assembly_1[+]1091036-1092526	2803	378.95	402.95	1945	381.13	413.48	1760	393.11	417.42
assembly_01077_gene	gnl.Prokka.assembly_1[+]1010356-1011615	163	26.08	27.73	230	53.33	57.86	130	34.36	36.48
assembly_01072_gene	gnl.Prokka.assembly_1[+]1004840-1006057	711	117.67	125.12	187	44.85	48.66	192	52.49	55.74
assembly_00805_gene	gnl.Prokka.assembly_1[+]747942-748604	843	256.3	272.53	601	264.84	287.32	584	293.35	311.49
assembly_01096_gene	gnl.Prokka.assembly_1[-]1026053-1026907	3707	873.96	929.32	1675	572.37	620.95	1757	684.36	726.68
assembly_02270_gene	gnl.Prokka.assembly_2[+]146117-147220	2535	462.85	492.17	2595	686.76	745.04	1774	535.14	568.23
assembly_01104_gene	gnl.Prokka.assembly_1[-]1031253-1031726	1516	644.69	685.53	638	393.26	426.63	475	333.73	354.37
assembly_01998_gene	gnl.Prokka.assembly_1[-]1841215-1842471	1343	215.37	229.01	1078	250.57	271.83	932	246.92	262.19
assembly_01206_gene	gnl.Prokka.assembly_1[+]1126907-1128628	2633	308.22	327.74	2532	429.6	466.06	2007	388.15	412.15
assembly_01967_gene	gnl.Prokka.assembly_1[-]1813942-1814322	406	214.8	228.41	265	203.21	220.46	224	195.79	207.9
assembly_02251_gene	gnl.Prokka.assembly_2[+]129760-131034	29	4.59	4.88	23	5.27	5.72	20	5.23	5.55
assembly_01274_gene	gnl.Prokka.assembly_1[+]1192672-1193667	753	152.4	162.05	474	139.04	150.84	485	162.16	172.19
assembly_02196_gene	gnl.Prokka.assembly_2[-]93792-94076	0	0	0	0	0	0	0	0	0
assembly_00644_gene	gnl.Prokka.assembly_1[-]595170-596798	1251	154.8	164.61	679	121.78	132.12	748	152.91	162.37
assembly_00295_gene	gnl.Prokka.assembly_1[+]269691-269912	494	448.55	476.96	257	338.23	366.93	191	286.52	304.24
assembly_01838_gene	gnl.Prokka.assembly_1[-]1691286-1692092	125	31.22	33.2	97	35.12	38.1	68	28.06	29.8
assembly_00882_gene	gnl.Prokka.assembly_1[+]817747-819000	2099	337.41	358.78	1132	263.75	286.13	1012	268.76	285.38
assembly_00797_gene	gnl.Prokka.assembly_1[-]739978-740949	184	38.16	40.58	144	43.29	46.96	106	36.31	38.56
assembly_00347_gene	gnl.Prokka.assembly_1[+]319765-320028	154	117.58	125.03	92	101.82	110.46	71	89.56	95.1
assembly_01969_gene	gnl.Prokka.assembly_1[+]1815284-1815427	0	0	0	1	2.03	2.2	0	0	0
assembly_02334_gene	gnl.Prokka.assembly_2[+]204290-206191	5454	578.02	614.63	939	144.24	156.48	1365	239	253.78
assembly_00018_gene	gnl.Prokka.assembly_1[-]18829-21498	11648	879.38	935.08	6746	738.19	800.84	6421	800.89	850.41
assembly_01210_gene	gnl.Prokka.assembly_1[+]1134421-1135566	2982	524.51	557.74	2389	609.06	660.75	2214	643.39	683.17
assembly_01583_gene	gnl.Prokka.assembly_1[-]1486999-1487271	355	262.12	278.72	196	209.76	227.56	185	225.68	239.63
assembly_01289_gene	gnl.Prokka.assembly_1[+]1206948-1207343	38137	19412.7	20642.4	25304	18669.2	20253.6	23487	19752.1	20973.5
assembly_01687_gene	gnl.Prokka.assembly_1[+]1575941-1576396	1503	664.39	706.48	669	428.64	465.02	669	488.59	518.8
assembly_00678_gene	gnl.Prokka.assembly_1[-]626839-628089	4282	689.95	733.66	3423	799.43	867.28	2158	574.48	610
assembly_00273_gene	gnl.Prokka.assembly_1[+]246259-246804	1667	615.43	654.41	1440	770.56	835.95	1153	703.26	746.75
assembly_01980_gene	gnl.Prokka.assembly_1[+]1823017-1824039	2309	454.97	483.79	905	258.46	280.4	843	274.43	291.4
assembly_01309_gene	gnl.Prokka.assembly_1[-]1222630-1223748	3225	580.94	617.74	2143	559.53	607.02	2004	596.41	633.29
assembly_01312_gene	gnl.Prokka.assembly_1[-]1225072-1225875	3432	860.45	914.95	1763	640.66	695.03	1882	779.55	827.75
assembly_00343_gene	gnl.Prokka.assembly_1[-]310199-310993	918	232.76	247.5	495	181.91	197.35	472	197.72	209.95
assembly_02139_gene	gnl.Prokka.assembly_2[+]55605-55913	16	10.44	11.1	30	28.36	30.77	14	15.09	16.02
assembly_01023_gene	gnl.Prokka.assembly_1[+]950305-950754	147	65.85	70.02	13	8.44	9.16	19	14.06	14.93
assembly_00133_gene	gnl.Prokka.assembly_1[+]124847-125104	801	625.82	665.46	561	635.29	689.21	441	569.25	604.45
assembly_01801_gene	gnl.Prokka.assembly_1[+]1662580-1662780	26	26.08	27.73	30	43.61	47.31	34	56.34	59.82
assembly_00283_gene	gnl.Prokka.assembly_1[+]253507-254412	671	149.29	158.75	509	164.14	178.07	452	166.15	176.42
assembly_00375_gene	gnl.Prokka.assembly_1[+]341351-342478	2573	459.79	488.92	1343	347.86	377.38	1328	392.08	416.32
assembly_01477_gene	gnl.Prokka.assembly_1[-]1389000-1389668	1078	324.81	345.38	661	288.67	313.17	590	293.7	311.86
assembly_00220_gene	gnl.Prokka.assembly_1[-]200076-200861	313	80.27	85.36	319	118.58	128.64	203	86.01	91.33
assembly_01916_gene	gnl.Prokka.assembly_1[-]1762691-1763287	1023	345.41	367.29	509	249.1	270.24	504	281.15	298.53
assembly_01134_gene	gnl.Prokka.assembly_1[+]1062055-1063089	985	191.84	203.99	660	186.31	202.12	517	166.35	176.64
assembly_00166_gene	gnl.Prokka.assembly_1[-]145990-146415	441	208.67	221.89	210	144.03	156.25	214	167.3	177.64
assembly_01240_gene	gnl.Prokka.assembly_1[-]1163906-1165378	543	74.3	79.01	414	82.12	89.09	309	69.86	74.18
assembly_01245_gene	gnl.Prokka.assembly_1[-]1169761-1170513	444	118.86	126.39	143	55.48	60.19	144	63.68	67.62
assembly_00350_gene	gnl.Prokka.assembly_1[-]321882-322517	470	148.96	158.4	202	92.79	100.67	191	100.02	106.2
assembly_01853_gene	gnl.Prokka.assembly_1[-]1706695-1707645	3261	691.2	734.98	1678	515.52	559.27	1424	498.66	529.5
assembly_01373_gene	gnl.Prokka.assembly_1[-]1292467-1292799	175	105.93	112.64	142	124.59	135.16	79	79	83.89
assembly_01275_gene	gnl.Prokka.assembly_1[+]1193724-1194500	756	196.13	208.55	389	146.28	158.69	325	139.3	147.91
assembly_00668_gene	gnl.Prokka.assembly_1[-]620470-621135	346	104.73	111.36	204	89.49	97.09	210	105.01	111.5
assembly_01991_gene	gnl.Prokka.assembly_1[-]1835864-1837426	13403	1728.53	1838.02	7488	1399.71	1518.5	7348	1565.64	1662.45
assembly_00717_gene	gnl.Prokka.assembly_1[+]662447-665044	567	43.99	46.78	167	18.78	20.37	234	30	31.85
assembly_01661_gene	gnl.Prokka.assembly_1[-]1552671-1553579	1940	430.2	457.45	2670	858.18	931.01	1775	650.3	690.51
assembly_01512_gene	gnl.Prokka.assembly_1[+]1420483-1421241	1366	362.78	385.76	626	240.97	261.42	568	249.22	264.63
assembly_01079_gene	gnl.Prokka.assembly_1[+]1012226-1013020	185	46.91	49.88	73	26.82	29.1	50	20.94	22.24
assembly_01576_gene	gnl.Prokka.assembly_1[-]1482168-1482914	471	127.1	135.15	224	87.61	95.05	197	87.83	93.26
assembly_00425_gene	gnl.Prokka.assembly_1[+]388919-389659	12492	3398.19	3613.45	5769	2274.65	2467.69	5717	2569.39	2728.27
assembly_00001_gene	gnl.Prokka.assembly_1[+]1-1311	901	138.53	147.31	692	154.22	167.31	380	96.53	102.5
assembly_00603_gene	gnl.Prokka.assembly_1[+]548383-548835	108	48.06	51.1	83	53.53	58.07	54	39.7	42.15
assembly_00219_gene	gnl.Prokka.assembly_1[+]199023-200084	691	131.15	139.46	562	154.61	167.73	440	137.98	146.51
assembly_00595_gene	gnl.Prokka.assembly_1[+]539975-540652	262	77.9	82.83	101	43.53	47.22	126	61.89	65.72
assembly_00719_gene	gnl.Prokka.assembly_1[+]666036-667076	113	21.88	23.27	100	28.07	30.45	81	25.92	27.52
assembly_02046_gene	gnl.Prokka.assembly_1[+]1876827-1878680	6521	708.99	753.9	6084	958.76	1040.13	5739	1030.87	1094.62
assembly_01952_gene	gnl.Prokka.assembly_1[+]1800835-1802649	1407	156.26	166.16	1454	234.06	253.92	1128	206.97	219.77
assembly_00053_gene	gnl.Prokka.assembly_1[+]47351-48241	159	35.97	38.25	171	56.07	60.83	118	44.1	46.83
assembly_01070_gene	gnl.Prokka.assembly_1[-]1003309-1004064	42	11.2	11.91	67	25.89	28.09	32	14.1	14.97
assembly_01353_gene	gnl.Prokka.assembly_1[-]1271749-1273242	3330	449.29	477.75	1345	263.03	285.35	1181	263.26	279.54
assembly_01812_gene	gnl.Prokka.assembly_1[+]1670073-1670318	7	5.74	6.1	2	2.38	2.58	3	4.06	4.31
assembly_01753_gene	gnl.Prokka.assembly_1[-]1630283-1630465	493	543.04	577.44	1286	2053.15	2227.4	723	1315.73	1397.09
assembly_00121_gene	gnl.Prokka.assembly_1[-]113590-114348	1514	402.09	427.56	789	303.71	329.49	701	307.58	326.6
assembly_00030_gene	gnl.Prokka.assembly_1[+]31802-32608	1007	251.53	267.46	568	205.64	223.09	600	247.61	262.92
assembly_01769_gene	gnl.Prokka.assembly_1[-]1636937-1637227	842	583.24	620.19	1337	1342.37	1456.29	588	672.92	714.53
assembly_00961_gene	gnl.Prokka.assembly_1[-]895148-896590	1110	155.06	164.88	836	169.26	183.63	768	177.25	188.21
assembly_01049_gene	gnl.Prokka.assembly_1[-]974864-975724	95	22.24	23.65	111	37.66	40.86	65	25.15	26.7
assembly_00058_gene	gnl.Prokka.assembly_1[+]51458-52267	1139	283.45	301.4	443	159.79	173.35	360	148.01	157.16
assembly_00342_gene	gnl.Prokka.assembly_1[+]309404-310123	49	13.72	14.59	27	10.96	11.89	27	12.49	13.26
assembly_00696_gene	gnl.Prokka.assembly_1[-]644931-646187	474	76.01	80.83	393	91.35	99.1	282	74.71	79.33
assembly_02112_gene	gnl.Prokka.assembly_2[+]36476-38239	432	49.36	52.49	279	46.21	50.13	230	43.42	46.11
assembly_00827_gene	gnl.Prokka.assembly_1[-]766719-767861	1894	334.01	355.17	1083	276.83	300.32	997	290.49	308.45
assembly_00418_gene	gnl.Prokka.assembly_1[+]383137-384999	2746	297.11	315.93	1416	222.06	240.91	1286	229.88	244.1
assembly_01203_gene	gnl.Prokka.assembly_1[+]1123161-1124309	1448	254.03	270.12	1881	478.3	518.89	1606	465.49	494.27
assembly_00611_gene	gnl.Prokka.assembly_1[+]561915-562823	212	47.01	49.99	108	34.71	37.66	110	40.3	42.79
assembly_01867_gene	gnl.Prokka.assembly_1[-]1717617-1718867	3946	635.82	676.1	2075	484.61	525.74	2055	547.06	580.89
assembly_01999_gene	gnl.Prokka.assembly_1[+]1842494-1842718	507	454.21	482.98	462	599.92	650.83	467	691.22	733.96
assembly_01033_gene	gnl.Prokka.assembly_1[-]960625-961080	981	433.65	461.12	289	185.17	200.88	140	102.25	108.57
assembly_02110_gene	gnl.Prokka.assembly_2[+]33610-35793	374	34.52	36.71	196	26.22	28.45	192	29.28	31.09
assembly_00483_gene	gnl.Prokka.assembly_1[+]440704-442638	910	94.8	100.8	298	44.99	48.81	215	37	39.29
assembly_00029_gene	gnl.Prokka.assembly_1[+]30669-31805	988	175.15	186.25	760	195.3	211.87	610	178.67	189.72
assembly_01615_gene	gnl.Prokka.assembly_1[-]1511424-1512914	15447	2088.33	2220.62	12598	2468.63	2678.13	9271	2070.76	2198.81
assembly_02281_gene	gnl.Prokka.assembly_2[+]155277-156344	427	80.59	85.7	236	64.56	70.04	180	56.13	59.6
assembly_00655_gene	gnl.Prokka.assembly_1[-]605060-608146	760	49.63	52.77	636	60.19	65.3	487	52.54	55.79
assembly_01412_gene	gnl.Prokka.assembly_1[-]1335822-1336562	3919	1066.08	1133.61	2180	859.55	932.5	2139	961.33	1020.78
assembly_00321_gene	gnl.Prokka.assembly_1[-]293315-294724	8189	1170.7	1244.86	5196	1076.67	1168.04	4597	1085.76	1152.9
assembly_00570_gene	gnl.Prokka.assembly_1[-]516597-517868	4835	766.2	814.74	3482	799.78	867.66	2926	766.07	813.44
assembly_02162_gene	gnl.Prokka.assembly_2[+]72126-72614	1392	573.8	610.15	618	369.24	400.58	601	409.3	434.61
assembly_00632_gene	gnl.Prokka.assembly_1[-]582501-583067	1986	706.05	750.77	1247	642.56	697.09	1295	760.62	807.65
assembly_01500_gene	gnl.Prokka.assembly_1[+]1408840-1409277	267	122.88	130.66	63	42.02	45.59	91	69.19	73.47
assembly_01124_gene	gnl.Prokka.assembly_1[-]1049725-1051077	348	51.85	55.13	291	62.84	68.17	285	70.15	74.49
assembly_00722_gene	gnl.Prokka.assembly_1[-]668821-669561	91	24.75	26.32	139	54.81	59.46	64	28.76	30.54
assembly_00019_gene	gnl.Prokka.assembly_1[-]21495-21980	1222	506.83	538.94	762	458.09	496.97	763	522.84	555.17
assembly_00191_gene	gnl.Prokka.assembly_1[+]167753-169237	196	26.6	28.29	158	31.08	33.72	152	34.09	36.2
assembly_01247_gene	gnl.Prokka.assembly_1[-]1171240-1171725	351	145.58	154.8	206	123.84	134.35	196	134.31	142.61
assembly_01939_gene	gnl.Prokka.assembly_1[+]1787566-1787868	431	286.73	304.89	408	393.41	426.8	286	314.34	333.78
assembly_00574_gene	gnl.Prokka.assembly_1[-]520914-521897	7428	1521.63	1618.02	5247	1557.93	1690.15	4788	1620.47	1720.67
assembly_00959_gene	gnl.Prokka.assembly_1[+]892154-893347	2410	406.86	432.63	684	167.38	181.58	1512	421.72	447.8
assembly_01391_gene	gnl.Prokka.assembly_1[-]1309243-1310880	705	86.75	92.25	350	62.43	67.73	272	55.3	58.72
assembly_02391_gene	gnl.Prokka.assembly_2[-]240592-241107	0	0	0	0	0	0	0	0	0
assembly_01496_gene	gnl.Prokka.assembly_1[+]1404993-1405880	234	53.12	56.48	171	56.26	61.04	123	46.13	48.98
assembly_00643_gene	gnl.Prokka.assembly_1[-]594409-595170	319	84.38	89.73	208	79.75	86.52	174	76.05	80.75
assembly_01034_gene	gnl.Prokka.assembly_1[-]961074-961820	2634	710.77	755.79	745	291.38	316.11	451	201.07	213.5
assembly_00265_gene	gnl.Prokka.assembly_1[+]240176-240550	636	341.86	363.52	314	244.64	265.4	302	268.2	284.78
assembly_00568_gene	gnl.Prokka.assembly_1[+]515231-515737	267	106.16	112.88	173	99.7	108.16	125	82.1	87.18
assembly_01624_gene	gnl.Prokka.assembly_1[+]1519099-1519512	238	115.88	123.22	223	157.37	170.73	133	106.98	113.6
assembly_01830_gene	gnl.Prokka.assembly_1[-]1684734-1685714	1700	349.31	371.44	1225	364.84	395.8	958	325.22	345.33
assembly_00334_gene	gnl.Prokka.assembly_1[-]306126-306941	1106	273.21	290.52	465	166.49	180.62	421	171.82	182.44
assembly_00471_gene	gnl.Prokka.assembly_1[+]430470-430955	436	180.84	192.29	203	122.03	132.39	157	107.59	114.24
assembly_00731_gene	gnl.Prokka.assembly_1[+]675046-675828	914	235.3	250.2	717	267.54	290.25	823	350.04	371.69
assembly_01713_gene	gnl.Prokka.assembly_1[-]1594722-1595732	3148	627.65	667.41	2266	654.85	710.42	1589	523.42	555.79
assembly_02325_gene	gnl.Prokka.assembly_2[-]196180-197127	689	146.5	155.78	482	148.55	161.16	170	59.72	63.41
assembly_00006_gene	gnl.Prokka.assembly_1[-]6456-7070	1583	518.84	551.71	733	348.23	377.78	536	290.25	308.2
assembly_00975_gene	gnl.Prokka.assembly_1[+]908365-908652	1748	1223.44	1300.94	877	889.69	965.2	785	907.73	963.86
assembly_01036_gene	gnl.Prokka.assembly_1[-]962350-963321	5149	1067.8	1135.44	2749	826.3	896.43	1540	527.63	560.26
assembly_01425_gene	gnl.Prokka.assembly_1[+]1346699-1346929	432	376.97	400.85	204	258.02	279.92	171	246.53	261.77
assembly_00998_gene	gnl.Prokka.assembly_1[-]927020-927664	101	31.56	33.56	61	27.63	29.98	52	26.85	28.51
assembly_02346_gene	gnl.Prokka.assembly_2[-]218402-218944	548	203.43	216.32	365	196.39	213.06	296	181.54	192.77
assembly_01900_gene	gnl.Prokka.assembly_1[+]1743615-1743857	279	231.44	246.1	177	212.81	230.87	169	231.61	245.93
assembly_01306_gene	gnl.Prokka.assembly_1[-]1219949-1221004	11658	2225.33	2366.29	7763	2147.82	2330.1	7286	2297.77	2439.85
assembly_00063_gene	gnl.Prokka.assembly_1[+]55811-56515	316	90.35	96.07	170	70.45	76.43	144	68.02	72.23
assembly_02114_gene	gnl.Prokka.assembly_2[+]39380-39730	78	44.79	47.63	37	30.8	33.41	33	31.31	33.25
assembly_00842_gene	gnl.Prokka.assembly_1[-]781679-782668	2737	557.28	592.58	1706	503.47	546.2	1749	588.35	624.73
assembly_01732_gene	gnl.Prokka.assembly_1[-]1616178-1617209	1587	309.97	329.61	935	264.71	287.17	844	272.36	289.2
assembly_01774_gene	gnl.Prokka.assembly_1[-]1640074-1642149	14625	1420.05	1510	21728	3057.9	3317.42	14305	2294.78	2436.68
assembly_00147_gene	gnl.Prokka.assembly_1[+]130798-131589	7231	1840.38	1956.96	9038	3334.1	3617.06	7736	3252.91	3454.06
assembly_00173_gene	gnl.Prokka.assembly_1[-]151808-152515	1352	384.93	409.31	702	289.69	314.28	701	329.73	350.12
assembly_00749_gene	gnl.Prokka.assembly_1[-]691435-692160	15	4.17	4.43	12	4.83	5.24	14	6.42	6.82
assembly_01918_gene	gnl.Prokka.assembly_1[-]1764441-1765217	1730	448.81	477.24	816	306.83	332.87	932	399.46	424.16
assembly_01683_gene	gnl.Prokka.assembly_1[+]1572409-1572675	3143	2372.83	2523.14	2195	2401.9	2605.74	1666	2078	2206.49
assembly_00232_gene	gnl.Prokka.assembly_1[+]208442-211078	2969	226.95	241.33	2147	237.88	258.07	1888	238.44	253.18
assembly_00600_gene	gnl.Prokka.assembly_1[-]544358-546826	3414	278.72	296.38	3893	460.67	499.77	2164	291.89	309.94
assembly_00556_gene	gnl.Prokka.assembly_1[+]504379-505695	3993	611.15	649.86	4121	914.21	991.8	3182	804.63	854.38
assembly_01686_gene	gnl.Prokka.assembly_1[+]1575337-1575933	368	124.25	132.12	213	104.24	113.09	174	97.07	103.07
assembly_00267_gene	gnl.Prokka.assembly_1[-]241496-241960	319	138.28	147.04	384	241.27	261.75	244	174.75	185.56
assembly_00575_gene	gnl.Prokka.assembly_1[-]521912-522778	7896	1835.78	1952.07	4620	1556.88	1689.01	4242	1629.41	1730.17
assembly_00972_gene	gnl.Prokka.assembly_1[-]905434-906039	37	12.31	13.09	71	34.23	37.14	53	29.13	30.93
assembly_00421_gene	gnl.Prokka.assembly_1[+]386188-386445	107	83.59	88.89	57	64.55	70.03	47	60.67	64.42
assembly_02301_gene	gnl.Prokka.assembly_2[+]175169-175921	174	46.58	49.53	141	54.71	59.35	40	17.69	18.78
assembly_01454_gene	gnl.Prokka.assembly_1[+]1370831-1371877	785	151.14	160.71	285	79.53	86.28	307	97.65	103.69
assembly_00384_gene	gnl.Prokka.assembly_1[-]350632-351591	3020	634.12	674.29	1975	601.08	652.09	1757	609.51	647.2
assembly_01850_gene	gnl.Prokka.assembly_1[-]1701782-1704412	202	15.48	16.46	177	19.65	21.32	104	13.17	13.98
assembly_00798_gene	gnl.Prokka.assembly_1[-]740946-742211	194	30.89	32.85	160	36.93	40.06	108	28.41	30.17
assembly_00923_gene	gnl.Prokka.assembly_1[+]857849-858634	1067	273.64	290.97	828	307.78	333.9	685	290.23	308.18
assembly_00072_gene	gnl.Prokka.assembly_1[-]62682-63695	3232	642.49	683.19	4646	1338.67	1452.28	3415	1121.59	1190.94
assembly_01385_gene	gnl.Prokka.assembly_1[+]1304796-1305779	1391	284.95	303	1187	352.44	382.35	1222	413.58	439.15
assembly_01119_gene	gnl.Prokka.assembly_1[+]1042955-1045459	2368	190.55	202.62	1273	148.48	161.08	1184	157.41	167.14
assembly_01448_gene	gnl.Prokka.assembly_1[+]1364725-1365348	4827	1559.29	1658.06	1988	930.81	1009.81	1867	996.42	1058.03
assembly_00875_gene	gnl.Prokka.assembly_1[-]812390-813055	429	129.84	138.07	179	78.53	85.19	144	72.01	76.46
assembly_00234_gene	gnl.Prokka.assembly_1[-]211849-212502	2077	640.17	680.72	2043	912.69	990.15	1802	917.61	974.35
assembly_01565_gene	gnl.Prokka.assembly_1[+]1471161-1472066	458	101.9	108.35	192	61.92	67.17	190	69.84	74.16
assembly_01368_gene	gnl.Prokka.assembly_1[-]1287653-1288486	1218	294.38	313.03	614	215.1	233.35	545	217.62	231.08
assembly_00770_gene	gnl.Prokka.assembly_1[+]711475-713526	6413	629.96	669.87	2388	340	368.86	3199	519.18	551.28
assembly_00206_gene	gnl.Prokka.assembly_1[-]182782-183639	186	43.7	46.47	73	24.86	26.97	81	31.44	33.38
assembly_00020_gene	gnl.Prokka.assembly_1[-]22015-22743	399	110.32	117.31	246	98.59	106.96	221	100.96	107.2
assembly_01032_gene	gnl.Prokka.assembly_1[-]958604-960610	7769	780.28	829.71	2064	300.46	325.96	1310	217.37	230.81
assembly_02180_gene	gnl.Prokka.assembly_2[+]86107-86523	24	11.6	12.34	19	13.31	14.44	6	4.79	5.09
assembly_00535_gene	gnl.Prokka.assembly_1[-]484109-485152	672	129.75	137.97	241	67.45	73.17	198	63.16	67.07
assembly_00902_gene	gnl.Prokka.assembly_1[+]838963-841419	1413	115.93	123.27	722	85.85	93.14	614	83.22	88.37
assembly_00944_gene	gnl.Prokka.assembly_1[-]875105-876370	2533	403.3	428.85	1469	339.02	367.79	1316	346.18	367.59
assembly_02366_gene	gnl.Prokka.assembly_2[-]232312-232986	175	52.26	55.57	126	54.54	59.17	74	36.51	38.77
assembly_02345_gene	gnl.Prokka.assembly_2[-]217135-218232	606	111.25	118.3	1387	369.07	400.39	772	234.15	248.63
assembly_02300_gene	gnl.Prokka.assembly_2[+]174517-175182	1275	385.9	410.34	1436	629.96	683.42	549	274.52	291.5
assembly_00768_gene	gnl.Prokka.assembly_1[+]710210-711091	2582	590.09	627.47	2140	708.89	769.05	1633	616.59	654.72
assembly_01074_gene	gnl.Prokka.assembly_1[+]1007336-1008361	207	40.66	43.24	156	44.42	48.19	97	31.48	33.43
assembly_01968_gene	gnl.Prokka.assembly_1[-]1814313-1815176	750	174.98	186.06	502	169.75	184.16	546	210.46	223.47
assembly_01215_gene	gnl.Prokka.assembly_1[+]1139469-1140128	299	91.32	97.1	218	96.5	104.69	192	96.88	102.87
assembly_00504_gene	gnl.Prokka.assembly_1[+]459660-460643	200	40.97	43.57	180	53.44	57.98	101	34.19	36.3
assembly_02318_gene	gnl.Prokka.assembly_2[+]190299-191321	471	92.81	98.69	228	65.11	70.64	170	55.34	58.76
assembly_01408_gene	gnl.Prokka.assembly_1[-]1330045-1331847	1351	151.04	160.61	482	78.1	84.73	565	104.36	110.81
assembly_00439_gene	gnl.Prokka.assembly_1[+]402361-402789	33	15.51	16.49	8	5.45	5.91	13	10.1	10.72
assembly_01071_gene	gnl.Prokka.assembly_1[+]1004197-1004850	384	118.35	125.85	90	40.21	43.62	144	73.33	77.86
assembly_00170_gene	gnl.Prokka.assembly_1[-]149278-150504	2152	353.54	375.93	1749	416.47	451.81	1625	441.05	468.32
assembly_02364_gene	gnl.Prokka.assembly_2[+]229691-230935	883	142.96	152.02	587	137.75	149.44	406	108.6	115.32
assembly_01382_gene	gnl.Prokka.assembly_1[+]1300418-1301530	533	96.54	102.65	316	82.95	89.99	283	84.67	89.91
assembly_00178_gene	gnl.Prokka.assembly_1[+]155734-157302	2484	319.13	339.34	1717	319.73	346.86	1236	262.35	278.57
assembly_00804_gene	gnl.Prokka.assembly_1[-]745999-747924	7134	746.63	793.93	3219	488.31	529.75	3157	545.88	579.64
assembly_02360_gene	gnl.Prokka.assembly_2[+]228030-228290	0	0	0	0	0	0	0	0	0
assembly_00521_gene	gnl.Prokka.assembly_1[+]475162-475725	2316	827.74	880.17	969	501.97	544.57	886	523.16	555.51
assembly_01501_gene	gnl.Prokka.assembly_1[-]1409364-1410236	4301	993.09	1056	2588	866.12	939.63	2027	773.25	821.07
assembly_01826_gene	gnl.Prokka.assembly_1[-]1680989-1681762	427	111.21	118.25	280	105.69	114.66	232	99.82	105.99
assembly_01380_gene	gnl.Prokka.assembly_1[+]1298058-1299176	1285	231.48	246.14	653	170.5	184.97	559	166.36	176.65
assembly_00818_gene	gnl.Prokka.assembly_1[-]758844-758936	4	8.67	9.22	5	15.71	17.04	2	7.16	7.6
assembly_00207_gene	gnl.Prokka.assembly_1[+]183746-186463	5929	439.71	467.56	8115	872.31	946.34	6814	834.89	886.52
assembly_01271_gene	gnl.Prokka.assembly_1[-]1190673-1190981	697	454.68	483.48	280	264.75	287.22	298	321.17	341.03
assembly_00509_gene	gnl.Prokka.assembly_1[+]464753-465880	4393	785.03	834.76	1851	479.43	520.12	1788	527.89	560.53
assembly_00276_gene	gnl.Prokka.assembly_1[+]248507-249091	451	155.41	165.25	242	120.86	131.12	194	110.44	117.27
assembly_00065_gene	gnl.Prokka.assembly_1[-]56965-57921	259	54.55	58.01	152	46.4	50.34	144	50.11	53.21
assembly_00460_gene	gnl.Prokka.assembly_1[-]422199-422915	388	109.08	115.99	395	160.96	174.62	249	115.66	122.81
assembly_00974_gene	gnl.Prokka.assembly_1[+]907147-908319	4680	804.24	855.18	2816	701.4	760.93	2673	758.89	805.82
assembly_01563_gene	gnl.Prokka.assembly_1[+]1468051-1469925	6804	731.47	777.81	3779	588.86	638.83	3593	638.17	677.63
assembly_00280_gene	gnl.Prokka.assembly_1[-]250443-251396	24	5.07	5.39	14	4.29	4.65	12	4.19	4.45
assembly_00171_gene	gnl.Prokka.assembly_1[-]150601-151269	1344	404.96	430.61	835	364.66	395.61	714	355.43	377.41
assembly_00394_gene	gnl.Prokka.assembly_1[+]360666-361037	206	111.62	118.69	80	62.83	68.16	47	42.08	44.68
assembly_01580_gene	gnl.Prokka.assembly_1[-]1485140-1485799	871	266.02	282.87	351	155.38	168.57	349	176.1	186.99
assembly_00621_gene	gnl.Prokka.assembly_1[-]572487-573077	195	66.51	70.72	66	32.63	35.4	80	45.08	47.87
assembly_00599_gene	gnl.Prokka.assembly_1[-]544016-544324	69	45.01	47.86	70	66.18	71.8	40	43.11	45.78
assembly_01243_gene	gnl.Prokka.assembly_1[-]1168046-1168903	794	186.53	198.35	352	119.87	130.04	329	127.7	135.6
assembly_00718_gene	gnl.Prokka.assembly_1[-]665041-665949	430	95.35	101.39	222	71.35	77.41	201	73.64	78.19
assembly_01142_gene	gnl.Prokka.assembly_1[+]1067961-1068395	302	139.95	148.81	301	202.16	219.32	272	208.23	221.11
assembly_00796_gene	gnl.Prokka.assembly_1[-]738796-739974	159	27.19	28.91	108	26.76	29.03	106	29.94	31.79
assembly_02292_gene	gnl.Prokka.assembly_2[+]166025-166954	173	37.49	39.87	157	49.32	53.51	110	39.39	41.83
assembly_01810_gene	gnl.Prokka.assembly_1[+]1669123-1669335	59	55.83	59.37	28	38.41	41.67	32	50.04	53.13
assembly_00858_gene	gnl.Prokka.assembly_1[+]797451-798533	143	26.61	28.3	95	25.63	27.8	75	23.06	24.49
assembly_01246_gene	gnl.Prokka.assembly_1[-]1170489-1171277	681	173.98	185	406	150.34	163.1	333	140.56	149.25
assembly_00370_gene	gnl.Prokka.assembly_1[-]338192-339046	1701	401.03	426.43	933	318.82	345.88	890	346.66	368.1
assembly_00355_gene	gnl.Prokka.assembly_1[-]324995-325654	164	50.09	53.26	95	42.05	45.62	80	40.36	42.86
assembly_01544_gene	gnl.Prokka.assembly_1[-]1453074-1453526	1099	489.03	520.01	555	357.95	388.33	481	353.61	375.48
assembly_01414_gene	gnl.Prokka.assembly_1[+]1337481-1338161	379	112.18	119.29	249	106.82	115.89	206	100.74	106.97
assembly_00279_gene	gnl.Prokka.assembly_1[-]249500-250456	6896	1452.51	1544.52	4743	1448.01	1570.9	4865	1692.98	1797.67
assembly_01880_gene	gnl.Prokka.assembly_1[-]1728165-1729322	82	14.28	15.18	41	10.34	11.22	36	10.35	10.99
assembly_00672_gene	gnl.Prokka.assembly_1[-]624831-625205	129	69.34	73.73	101	78.69	85.37	76	67.5	71.67
assembly_00231_gene	gnl.Prokka.assembly_1[+]206660-208270	4747	593.96	631.58	4714	854.93	927.48	3449	712.98	757.07
assembly_02332_gene	gnl.Prokka.assembly_2[+]202862-203341	3916	1644.51	1748.68	534	325.04	352.62	1002	695.19	738.18
assembly_01821_gene	gnl.Prokka.assembly_1[+]1677103-1677813	2362	669.64	712.06	1447	594.61	645.07	1265	592.52	629.16
assembly_00532_gene	gnl.Prokka.assembly_1[-]482163-482555	526	269.79	286.88	289	214.85	233.08	253	214.39	227.65
assembly_01426_gene	gnl.Prokka.assembly_1[+]1347006-1347614	849	281.01	298.81	410	196.7	213.39	360	196.87	209.04
assembly_00508_gene	gnl.Prokka.assembly_1[+]464133-464759	1554	499.59	531.24	695	323.86	351.34	674	357.99	380.13
assembly_01232_gene	gnl.Prokka.assembly_1[+]1153605-1154312	652	185.63	197.39	332	137	148.63	290	136.41	144.84
assembly_01128_gene	gnl.Prokka.assembly_1[-]1055119-1056252	1097	195	207.35	527	135.78	147.3	574	168.57	178.99
assembly_01419_gene	gnl.Prokka.assembly_1[-]1341085-1341732	2484	772.7	821.65	1435	647.01	701.92	1324	680.44	722.52
assembly_01597_gene	gnl.Prokka.assembly_1[+]1501031-1501891	968	226.62	240.98	447	151.69	164.56	406	157.04	166.75
assembly_02002_gene	gnl.Prokka.assembly_1[-]1844191-1844982	1212	308.47	328.01	736	271.51	294.55	704	296.02	314.33
assembly_00172_gene	gnl.Prokka.assembly_1[-]151266-151811	1923	709.94	754.91	1194	638.92	693.14	1103	672.77	714.37
assembly_01943_gene	gnl.Prokka.assembly_1[-]1791027-1791428	90	45.13	47.99	37	26.89	29.17	40	33.14	35.19
assembly_01990_gene	gnl.Prokka.assembly_1[-]1834986-1835864	3900	894.36	951.01	2004	666.1	722.63	1793	679.31	721.32
assembly_01384_gene	gnl.Prokka.assembly_1[+]1302620-1304743	1584	150.33	159.85	2022	278.14	301.74	2246	352.15	373.93
assembly_02328_gene	gnl.Prokka.assembly_2[-]199025-200455	1376	193.82	206.1	559	114.13	123.82	542	126.14	133.94
assembly_02260_gene	gnl.Prokka.assembly_2[+]138312-138845	104	39.25	41.74	58	31.74	34.43	74	46.15	49
assembly_01872_gene	gnl.Prokka.assembly_1[-]1719653-1719880	285	251.97	267.93	222	284.48	308.62	183	267.3	283.83
assembly_01956_gene	gnl.Prokka.assembly_1[-]1804344-1805111	962	252.5	268.49	646	245.75	266.61	606	262.78	279.03
assembly_01434_gene	gnl.Prokka.assembly_1[+]1353840-1354403	910	325.24	345.84	467	241.92	262.45	434	256.26	272.11
assembly_01763_gene	gnl.Prokka.assembly_1[-]1634078-1634296	1238	1139.49	1211.67	2425	3235.19	3509.75	1190	1809.6	1921.5
assembly_01930_gene	gnl.Prokka.assembly_1[+]1776160-1776444	71	50.22	53.4	51	52.28	56.72	45	52.58	55.83
assembly_01006_gene	gnl.Prokka.assembly_1[-]933413-933928	9	3.52	3.74	2	1.13	1.23	1	0.65	0.69
assembly_00633_gene	gnl.Prokka.assembly_1[+]583118-584194	580	108.55	115.43	296	80.3	87.11	256	79.16	84.05
assembly_01497_gene	gnl.Prokka.assembly_1[+]1405877-1406830	1132	239.18	254.33	742	227.24	246.53	636	222.02	235.75
assembly_02312_gene	gnl.Prokka.assembly_2[-]184489-185346	14424	3388.69	3603.35	3233	1100.91	1194.34	2387	926.5	983.79
assembly_01547_gene	gnl.Prokka.assembly_1[-]1455012-1456160	4682	821.38	873.41	1566	398.21	432	1549	448.97	476.73
assembly_01681_gene	gnl.Prokka.assembly_1[+]1571748-1572089	635	374.26	397.97	304	259.7	281.74	202	196.7	208.86
assembly_00844_gene	gnl.Prokka.assembly_1[-]784828-785349	164	63.33	67.34	97	54.29	58.9	89	56.78	60.29
assembly_02184_gene	gnl.Prokka.assembly_2[+]90569-90796	47	41.55	44.18	19	24.34	26.41	13	18.99	20.16
assembly_00450_gene	gnl.Prokka.assembly_1[-]413840-415066	5165	848.51	902.26	2512	598.15	648.91	2326	631.31	670.35
assembly_02055_gene	gnl.Prokka.assembly_1[-]1887231-1887758	1315	502.03	533.83	950	525.68	570.29	811	511.53	543.16
assembly_00518_gene	gnl.Prokka.assembly_1[-]473505-473897	255	130.79	139.08	119	88.47	95.98	123	104.23	110.68
assembly_00614_gene	gnl.Prokka.assembly_1[+]564991-566043	2252	431.09	458.4	1038	288.01	312.45	973	307.73	326.76
assembly_00114_gene	gnl.Prokka.assembly_1[+]106688-106993	665	438.06	465.81	1405	1341.49	1455.34	1002	1090.51	1157.94
assembly_00849_gene	gnl.Prokka.assembly_1[-]789137-789682	287	105.96	112.67	240	128.42	139.32	243	148.21	157.38
assembly_02082_gene	gnl.Prokka.assembly_2[-]4733-5254	20	7.72	8.21	7	3.92	4.25	7	4.46	4.74
assembly_00038_gene	gnl.Prokka.assembly_1[-]37568-38698	2292	408.49	434.37	1294	334.27	362.64	1104	325.08	345.18
assembly_01809_gene	gnl.Prokka.assembly_1[+]1668875-1669126	71	56.79	60.39	34	39.41	42.76	53	70.04	74.37
assembly_00514_gene	gnl.Prokka.assembly_1[+]469486-470235	1459	392.13	416.97	868	338.13	366.83	762	338.36	359.28
assembly_01106_gene	gnl.Prokka.assembly_1[-]1032162-1033817	7297	888.22	944.48	5257	927.49	1006.2	4947	994.86	1056.38
assembly_00270_gene	gnl.Prokka.assembly_1[-]244131-244838	409	116.44	123.82	249	102.75	111.47	227	106.78	113.38
assembly_00733_gene	gnl.Prokka.assembly_1[+]676767-678074	4826	743.73	790.84	3468	774.65	840.39	3641	927.03	984.35
assembly_01310_gene	gnl.Prokka.assembly_1[-]1223760-1224839	4406	822.35	874.44	1806	488.57	530.03	1701	524.52	556.95
assembly_00640_gene	gnl.Prokka.assembly_1[-]591610-592635	1782	350.1	372.28	1296	369.05	400.37	1109	359.97	382.23
assembly_02219_gene	gnl.Prokka.assembly_2[-]105405-105737	42	25.42	27.03	22	19.3	20.94	15	15	15.93
assembly_00541_gene	gnl.Prokka.assembly_1[-]491132-491461	175	106.9	113.67	73	64.63	70.12	72	72.66	77.15
assembly_01877_gene	gnl.Prokka.assembly_1[+]1724812-1725900	1211	224.16	238.36	771	206.85	224.41	596	182.26	193.53
assembly_00726_gene	gnl.Prokka.assembly_1[-]671637-673394	1951	223.7	237.87	1952	324.41	351.94	2279	431.72	458.42
assembly_00864_gene	gnl.Prokka.assembly_1[+]801798-803153	921	136.91	145.58	399	85.97	93.27	419	102.91	109.27
assembly_00953_gene	gnl.Prokka.assembly_1[-]883057-884175	1462	263.36	280.04	1078	281.46	305.35	888	264.28	280.62
assembly_00740_gene	gnl.Prokka.assembly_1[-]682821-683627	5963	1489.45	1583.8	2970	1075.27	1166.52	2688	1109.27	1177.86
assembly_00073_gene	gnl.Prokka.assembly_1[-]63710-65536	5445	600.75	638.8	5605	896.33	972.4	3826	697.41	740.53
assembly_00988_gene	gnl.Prokka.assembly_1[+]917504-917986	721	300.9	319.96	663	401.05	435.09	487	335.79	356.55
assembly_01775_gene	gnl.Prokka.assembly_1[-]1642152-1642622	2045	875.2	930.64	2911	1805.73	1958.98	2083	1472.82	1563.89
assembly_01168_gene	gnl.Prokka.assembly_1[-]1093488-1094348	657	153.82	163.56	537	182.23	197.69	421	162.84	172.91
assembly_01076_gene	gnl.Prokka.assembly_1[+]1009677-1010363	79	23.18	24.65	95	40.4	43.83	51	24.72	26.25
assembly_01955_gene	gnl.Prokka.assembly_1[-]1803811-1804347	1038	389.64	414.32	591	321.55	348.84	585	362.8	385.23
assembly_00124_gene	gnl.Prokka.assembly_1[-]116548-117363	834	206.02	219.07	703	251.71	273.07	516	210.59	223.61
assembly_01792_gene	gnl.Prokka.assembly_1[+]1652896-1653948	178	34.07	36.23	79	21.92	23.78	62	19.61	20.82
assembly_01234_gene	gnl.Prokka.assembly_1[+]1154614-1156614	3274	329.81	350.7	1108	161.78	175.51	1151	191.56	203.41
assembly_02222_gene	gnl.Prokka.assembly_2[+]106666-107631	668	139.39	148.22	326	98.6	106.97	269	92.74	98.47
assembly_01922_gene	gnl.Prokka.assembly_1[-]1768239-1769315	2062	385.93	410.38	1240	336.38	364.93	1252	387.14	411.08
assembly_01133_gene	gnl.Prokka.assembly_1[+]1058830-1061961	4744	305.32	324.66	4360	406.72	441.24	3212	341.53	362.65
assembly_01716_gene	gnl.Prokka.assembly_1[+]1598299-1599438	1424	251.79	267.74	785	201.19	218.26	692	202.15	214.65
assembly_00618_gene	gnl.Prokka.assembly_1[-]569381-570511	7679	1368.6	1455.29	3075	794.36	861.77	2812	828.01	879.21
assembly_01435_gene	gnl.Prokka.assembly_1[-]1354406-1355209	1031	258.49	274.86	693	251.83	273.2	564	233.61	248.06
assembly_01472_gene	gnl.Prokka.assembly_1[-]1386460-1386888	1092	513.1	545.6	947	644.95	699.68	705	547.29	581.13
assembly_02005_gene	gnl.Prokka.assembly_1[-]1846750-1847964	494	81.96	87.15	176	42.32	45.91	160	43.86	46.57
assembly_01371_gene	gnl.Prokka.assembly_1[-]1291027-1291584	271	97.9	104.1	174	91.11	98.84	176	105.04	111.54
assembly_01752_gene	gnl.Prokka.assembly_1[-]1629834-1630286	1264	562.45	598.08	2857	1842.66	1999.04	1422	1045.4	1110.04
assembly_00167_gene	gnl.Prokka.assembly_1[-]146514-147398	738	168.09	178.74	407	134.37	145.77	334	125.69	133.46
assembly_00032_gene	gnl.Prokka.assembly_1[-]33080-33427	259	150.02	159.52	198	166.23	180.34	168	160.77	170.71
assembly_02342_gene	gnl.Prokka.assembly_2[-]215119-216510	1083	156.83	166.76	629	132.03	143.23	549	131.35	139.47
assembly_00622_gene	gnl.Prokka.assembly_1[+]573214-573780	183	65.06	69.18	57	29.37	31.86	38	22.32	23.7
assembly_01552_gene	gnl.Prokka.assembly_1[-]1457982-1458404	4649	2215.41	2355.74	1941	1340.65	1454.43	2297	1808.42	1920.25
assembly_01954_gene	gnl.Prokka.assembly_1[-]1803557-1803814	324	253.14	269.17	148	167.6	181.82	128	165.22	175.44
assembly_00448_gene	gnl.Prokka.assembly_1[-]411421-412614	4709	794.98	845.34	2971	726.99	788.69	2302	642.07	681.77
assembly_02339_gene	gnl.Prokka.assembly_2[-]211308-212603	729	113.39	120.57	328	73.94	80.22	229	58.84	62.48
assembly_02095_gene	gnl.Prokka.assembly_2[-]16996-17376	1	0.53	0.56	0	0	0	0	0	0
assembly_02266_gene	gnl.Prokka.assembly_2[+]142769-143440	637	191.08	203.18	938	407.82	442.43	597	295.86	314.15
assembly_02223_gene	gnl.Prokka.assembly_2[+]108311-108781	1545	661.22	703.1	1051	651.95	707.28	976	690.1	732.77
assembly_01646_gene	gnl.Prokka.assembly_1[-]1537793-1538611	1086	267.29	284.22	585	208.69	226.4	490	199.25	211.57
assembly_01378_gene	gnl.Prokka.assembly_1[+]1296348-1296974	1050	337.57	358.95	759	353.67	383.69	625	331.96	352.49
assembly_01457_gene	gnl.Prokka.assembly_1[-]1373701-1374054	176	100.22	106.57	80	66.03	71.63	61	57.38	60.93
assembly_02340_gene	gnl.Prokka.assembly_2[-]212741-213634	404	91.09	96.86	190	62.09	67.36	200	74.5	79.11
assembly_00945_gene	gnl.Prokka.assembly_1[-]876373-876642	145	108.25	115.11	93	100.64	109.18	82	101.15	107.4
assembly_01209_gene	gnl.Prokka.assembly_1[-]1131433-1134300	4344	305.31	324.65	1971	200.79	217.83	1966	228.29	242.41
assembly_01817_gene	gnl.Prokka.assembly_1[+]1674977-1675213	676	574.95	611.37	543	669.4	726.21	464	652	692.32
assembly_01262_gene	gnl.Prokka.assembly_1[-]1184263-1184700	1049	482.77	513.35	617	411.57	446.5	532	404.5	429.51
assembly_01050_gene	gnl.Prokka.assembly_1[+]975775-977703	942	98.43	104.67	732	110.87	120.28	548	94.61	100.46
assembly_00424_gene	gnl.Prokka.assembly_1[+]388701-388922	1182	1073.25	1141.23	527	693.57	752.43	666	999.08	1060.86
assembly_00401_gene	gnl.Prokka.assembly_1[-]365719-366711	523	106.16	112.89	361	106.22	115.23	264	88.54	94.01
assembly_01241_gene	gnl.Prokka.assembly_1[-]1165347-1166687	668	100.41	106.77	431	93.9	101.87	337	83.69	88.87
assembly_00175_gene	gnl.Prokka.assembly_1[+]153347-154285	983	211.02	224.39	998	310.53	336.88	718	254.64	270.39
assembly_00725_gene	gnl.Prokka.assembly_1[-]670865-671626	225	59.52	63.29	217	83.2	90.26	219	95.71	101.63
assembly_02032_gene	gnl.Prokka.assembly_1[-]1867844-1868908	1444	273.31	290.62	827	226.88	246.13	759	237.34	252.02
assembly_01747_gene	gnl.Prokka.assembly_1[-]1626835-1626948	231	408.46	434.33	594	1522.34	1651.54	364	1063.36	1129.11
assembly_02014_gene	gnl.Prokka.assembly_1[+]1853618-1853893	129	94.21	100.18	115	121.74	132.07	128	154.45	164
assembly_00593_gene	gnl.Prokka.assembly_1[+]537847-538317	372	159.21	169.29	275	170.58	185.06	167	118.08	125.38
assembly_00112_gene	gnl.Prokka.assembly_1[+]103581-105818	2121	191.04	203.14	1274	166.32	180.43	1276	189.88	201.62
assembly_00752_gene	gnl.Prokka.assembly_1[-]693931-695106	65	11.14	11.85	83	20.62	22.37	80	22.66	24.06
assembly_00625_gene	gnl.Prokka.assembly_1[-]576706-577449	109	29.53	31.4	60	23.56	25.56	56	25.07	26.62
assembly_02274_gene	gnl.Prokka.assembly_2[+]148897-149745	1220	289.66	308.01	1332	458.38	497.28	937	367.54	390.27
assembly_00926_gene	gnl.Prokka.assembly_1[-]859886-860896	1032	205.76	218.79	665	192.18	208.49	588	193.69	205.67
assembly_02296_gene	gnl.Prokka.assembly_2[+]170313-171233	95	20.79	22.11	132	41.88	45.43	113	40.86	43.39
assembly_02293_gene	gnl.Prokka.assembly_2[+]166964-167683	158	44.24	47.04	78	31.65	34.34	47	21.74	23.08
assembly_01186_gene	gnl.Prokka.assembly_1[-]1110705-1111553	2375	563.88	599.6	1536	528.59	573.45	1133	444.43	471.91
assembly_00865_gene	gnl.Prokka.assembly_1[+]803206-803352	75	102.85	109.36	38	75.53	81.94	39	88.36	93.82
assembly_01987_gene	gnl.Prokka.assembly_1[-]1833072-1833494	723	344.54	366.36	321	221.71	240.53	247	194.47	206.49
assembly_00398_gene	gnl.Prokka.assembly_1[-]363912-364934	4274	842.15	895.5	2995	855.37	927.96	2393	779.02	827.19
assembly_02126_gene	gnl.Prokka.assembly_2[-]46990-47241	86	68.79	73.15	54	62.61	67.92	63	83.26	88.41
assembly_00822_gene	gnl.Prokka.assembly_1[+]761269-762255	2425	495.26	526.63	812	240.36	260.76	957	322.9	342.87
assembly_00203_gene	gnl.Prokka.assembly_1[+]180755-181300	8094	2988.17	3177.45	4413	2361.42	2561.83	4446	2711.8	2879.49
assembly_01167_gene	gnl.Prokka.assembly_1[-]1092558-1093487	326	70.66	75.14	272	85.45	92.7	217	77.71	82.51
assembly_01957_gene	gnl.Prokka.assembly_1[-]1805108-1805914	429	107.15	113.94	222	80.37	87.19	210	86.66	92.02
assembly_02044_gene	gnl.Prokka.assembly_1[+]1876028-1876309	410	293.07	311.63	268	277.67	301.23	292	344.84	366.16
assembly_01888_gene	gnl.Prokka.assembly_1[+]1734366-1734695	468	285.87	303.98	418	370.08	401.49	304	306.79	325.76
assembly_01898_gene	gnl.Prokka.assembly_1[+]1742866-1743426	13	4.67	4.97	14	7.29	7.91	13	7.71	8.19
assembly_01304_gene	gnl.Prokka.assembly_1[+]1217862-1219529	4350	525.69	558.99	2342	410.23	445.04	2320	463.21	491.85
assembly_01760_gene	gnl.Prokka.assembly_1[-]1633071-1633403	870	526.63	559.99	2102	1844.25	2000.77	1128	1128.09	1197.85
assembly_00724_gene	gnl.Prokka.assembly_1[-]670218-670868	116	35.91	38.19	157	70.46	76.44	133	68.04	72.25
assembly_02090_gene	gnl.Prokka.assembly_2[+]12335-12679	107	62.52	66.48	56	47.43	51.45	38	36.68	38.95
assembly_01465_gene	gnl.Prokka.assembly_1[-]1380300-1380677	400	213.31	226.82	213	164.64	178.61	211	185.89	197.39
assembly_01673_gene	gnl.Prokka.assembly_1[-]1563774-1565732	4050	416.73	443.13	1905	284.12	308.23	1651	280.66	298.02
assembly_01510_gene	gnl.Prokka.assembly_1[-]1418809-1420140	2092	316.59	336.64	1428	313.23	339.81	1247	311.78	331.06
assembly_01696_gene	gnl.Prokka.assembly_1[-]1580745-1581068	622	386.97	411.48	404	364.31	395.23	355	364.9	387.46
assembly_00414_gene	gnl.Prokka.assembly_1[-]378807-379355	105	38.55	40.99	67	35.65	38.68	41	24.87	26.41
assembly_01589_gene	gnl.Prokka.assembly_1[+]1491049-1491762	2732	771.28	820.14	1665	681.32	739.14	1467	684.25	726.56
assembly_00096_gene	gnl.Prokka.assembly_1[+]85487-86236	906	243.51	258.93	375	146.08	158.48	324	143.86	152.76
assembly_00807_gene	gnl.Prokka.assembly_1[-]749608-751431	9993	1104.35	1174.3	5505	881.79	956.62	5314	970.23	1030.23
assembly_01525_gene	gnl.Prokka.assembly_1[-]1432686-1433051	1788	984.74	1047.12	1170	933.98	1013.24	1098	999.08	1060.86
assembly_01086_gene	gnl.Prokka.assembly_1[+]1017853-1018188	0	0	0	0	0	0	1	0.99	1.05
assembly_01300_gene	gnl.Prokka.assembly_1[+]1215021-1216058	2201	427.42	454.5	1100	309.62	335.9	1155	370.57	393.48
assembly_02315_gene	gnl.Prokka.assembly_2[+]187756-188925	1670	287.71	305.94	1043	260.46	282.56	629	179.04	190.11
assembly_01582_gene	gnl.Prokka.assembly_1[+]1486434-1487015	623	215.77	229.44	557	279.62	303.35	315	180.24	191.39
assembly_01756_gene	gnl.Prokka.assembly_1[-]1631297-1631839	1526	566.49	602.37	4116	2214.66	2402.61	2005	1229.69	1305.73
assembly_01208_gene	gnl.Prokka.assembly_1[-]1131099-1131455	181	102.2	108.67	62	50.74	55.05	49	45.71	48.54
assembly_01314_gene	gnl.Prokka.assembly_1[+]1226259-1226396	7	10.22	10.87	6	12.7	13.78	7	16.9	17.94
assembly_02164_gene	gnl.Prokka.assembly_2[-]73894-75072	109	18.64	19.82	313	77.57	84.15	138	38.98	41.39
assembly_01650_gene	gnl.Prokka.assembly_1[-]1542729-1543091	1027	570.29	606.42	538	433.02	469.77	432	396.33	420.84
assembly_01767_gene	gnl.Prokka.assembly_1[-]1635765-1636046	792	566.12	601.98	1640	1699.13	1843.33	751	886.9	941.74
assembly_01438_gene	gnl.Prokka.assembly_1[-]1357043-1358125	1458	271.37	288.56	720	194.24	210.72	688	211.57	224.65
assembly_01009_gene	gnl.Prokka.assembly_1[-]935871-936623	6251	1673.35	1779.35	1873	726.73	788.41	1948	861.54	914.81
assembly_01433_gene	gnl.Prokka.assembly_1[+]1352462-1353850	2086	302.72	321.9	1024	215.39	233.67	1027	246.23	261.46
assembly_01067_gene	gnl.Prokka.assembly_1[-]999904-1002114	180	16.41	17.45	89	11.76	12.76	63	9.49	10.08
assembly_01523_gene	gnl.Prokka.assembly_1[-]1430566-1432299	9016	1048.09	1114.48	5747	968.33	1050.51	4902	941.46	999.68
assembly_00240_gene	gnl.Prokka.assembly_1[+]217984-218943	2694	565.67	601.5	1814	552.08	598.93	1614	559.91	594.53
assembly_02319_gene	gnl.Prokka.assembly_2[-]191409-191969	17	6.11	6.5	11	5.72	6.21	7	4.15	4.41
assembly_01797_gene	gnl.Prokka.assembly_1[-]1656111-1656860	1595	428.68	455.83	964	375.53	407.4	904	401.41	426.23
assembly_00727_gene	gnl.Prokka.assembly_1[-]673458-673979	186	71.82	76.37	103	57.65	62.54	82	52.32	55.55
assembly_02298_gene	gnl.Prokka.assembly_2[+]172116-173411	324	50.4	53.59	284	64.03	69.46	237	60.9	64.67
assembly_01126_gene	gnl.Prokka.assembly_1[-]1053335-1054534	1241	208.46	221.67	671	163.37	177.24	667	185.1	196.55
assembly_00209_gene	gnl.Prokka.assembly_1[-]187727-188290	104	37.17	39.52	73	37.82	41.03	78	46.06	48.91
assembly_00458_gene	gnl.Prokka.assembly_1[-]419611-421497	2544	271.76	288.97	1397	216.3	234.66	1168	206.13	218.88
assembly_01910_gene	gnl.Prokka.assembly_1[-]1754319-1757678	14005	840.19	893.41	9793	851.54	923.81	8009	793.81	842.9
assembly_00022_gene	gnl.Prokka.assembly_1[-]23554-23760	2699	2628.24	2794.73	1716	2422.03	2627.58	1908	3069.65	3259.46
assembly_00950_gene	gnl.Prokka.assembly_1[+]880348-881031	139	40.97	43.56	72	30.75	33.36	52	25.31	26.88
assembly_00589_gene	gnl.Prokka.assembly_1[-]535775-536536	862	228.03	242.47	350	134.2	145.59	379	165.64	175.88
assembly_01553_gene	gnl.Prokka.assembly_1[-]1458467-1458895	12108	5689.17	6049.55	7052	4802.72	5210.31	7953	6173.83	6555.59
assembly_01460_gene	gnl.Prokka.assembly_1[-]1375951-1376715	264	69.56	73.97	127	48.5	52.62	142	61.82	65.64
assembly_00835_gene	gnl.Prokka.assembly_1[+]773852-774937	1287	238.88	254.01	656	176.48	191.46	654	200.55	212.95
assembly_01699_gene	gnl.Prokka.assembly_1[+]1583406-1584470	3441	651.28	692.54	2203	604.36	655.65	2034	636.04	675.37
assembly_02291_gene	gnl.Prokka.assembly_2[+]164998-166032	264	51.41	54.67	168	47.43	51.45	118	37.97	40.32
assembly_01286_gene	gnl.Prokka.assembly_1[+]1203763-1204344	22	7.62	8.1	2	1	1.09	4	2.29	2.43
assembly_01562_gene	gnl.Prokka.assembly_1[-]1466069-1467916	21850	2383.33	2534.3	14608	2309.52	2505.52	14018	2526.18	2682.39
assembly_00026_gene	gnl.Prokka.assembly_1[-]26991-28565	3371	431.43	458.76	2483	460.6	499.69	2424	512.55	544.24
assembly_02277_gene	gnl.Prokka.assembly_2[+]150479-151486	541	108.19	115.04	404	117.1	127.04	337	111.34	118.22
assembly_01322_gene	gnl.Prokka.assembly_1[+]1239064-1240380	330	50.51	53.71	221	49.03	53.19	187	47.29	50.21
assembly_00473_gene	gnl.Prokka.assembly_1[-]431459-432373	2814	619.92	659.19	1457	465.24	504.72	1424	518.28	550.33
assembly_01301_gene	gnl.Prokka.assembly_1[+]1216068-1216601	1893	714.57	759.83	985	538.92	584.66	937	584.36	620.49
assembly_00157_gene	gnl.Prokka.assembly_1[+]138893-139543	187	57.9	61.57	74	33.21	36.03	47	24.04	25.53
assembly_00036_gene	gnl.Prokka.assembly_1[+]35918-36313	570	290.14	308.52	466	343.81	372.99	377	317.05	336.65
assembly_01734_gene	gnl.Prokka.assembly_1[-]1617833-1618771	2251	483.22	513.83	1117	347.55	377.05	1006	356.79	378.85
assembly_01813_gene	gnl.Prokka.assembly_1[+]1670315-1670950	189	59.91	63.7	110	50.53	54.82	70	36.65	38.92
assembly_00957_gene	gnl.Prokka.assembly_1[+]886712-889648	3233	221.88	235.94	1872	186.23	202.03	1583	179.5	190.6
assembly_00383_gene	gnl.Prokka.assembly_1[-]349478-350515	507	98.45	104.69	197	55.45	60.16	172	55.19	58.6
assembly_01964_gene	gnl.Prokka.assembly_1[-]1810600-1812579	6370	648.5	689.58	4481	661.21	717.33	4103	690.11	732.78
assembly_01098_gene	gnl.Prokka.assembly_1[-]1027565-1028005	4290	1960.89	2085.1	3361	2226.7	2415.67	2901	2190.73	2326.2
assembly_01100_gene	gnl.Prokka.assembly_1[-]1028781-1029269	2330	960.46	1021.3	1122	670.37	727.26	1049	714.41	758.59
assembly_00863_gene	gnl.Prokka.assembly_1[+]801316-801783	319	137.4	146.1	127	79.28	86.01	106	75.43	80.09
assembly_02252_gene	gnl.Prokka.assembly_2[+]131034-131483	1	0.45	0.48	1	0.65	0.7	3	2.22	2.36
assembly_01228_gene	gnl.Prokka.assembly_1[-]1150894-1151721	340	82.77	88.01	167	58.93	63.93	157	63.15	67.05
assembly_00789_gene	gnl.Prokka.assembly_1[+]728738-730087	7042	1051.47	1118.07	3036	657.05	712.81	2773	684.06	726.36
assembly_01894_gene	gnl.Prokka.assembly_1[+]1738306-1739610	4949	764.44	812.86	2726	610.31	662.1	2664	679.83	721.87
assembly_01901_gene	gnl.Prokka.assembly_1[+]1743870-1744247	301	160.51	170.68	236	182.41	197.89	187	164.75	174.94
assembly_01149_gene	gnl.Prokka.assembly_1[+]1073626-1074879	1897	304.93	324.25	851	198.27	215.1	723	192.01	203.88
assembly_01212_gene	gnl.Prokka.assembly_1[+]1136331-1137275	1442	307.59	327.07	924	285.68	309.92	930	327.74	348.01
assembly_00506_gene	gnl.Prokka.assembly_1[+]462071-463093	976	192.31	204.49	961	274.46	297.75	749	243.83	258.91
assembly_01144_gene	gnl.Prokka.assembly_1[+]1069246-1069491	423	346.6	368.56	200	237.53	257.69	180	243.68	258.75
assembly_00760_gene	gnl.Prokka.assembly_1[-]704460-704738	234	169.06	179.77	222	232.48	252.21	157	187.4	198.99
assembly_02308_gene	gnl.Prokka.assembly_2[+]181783-182625	458	109.51	116.45	280	97.04	105.28	161	63.61	67.54
assembly_00480_gene	gnl.Prokka.assembly_1[-]439041-439289	910	736.68	783.34	569	667.64	724.3	512	684.78	727.12
assembly_00830_gene	gnl.Prokka.assembly_1[-]769456-769866	652	319.77	340.03	473	336.24	364.78	328	265.78	282.21
assembly_01754_gene	gnl.Prokka.assembly_1[-]1630446-1630934	1827	753.12	800.83	3945	2357.05	2557.09	2155	1467.64	1558.39
assembly_01256_gene	gnl.Prokka.assembly_1[+]1178951-1180081	1578	281.24	299.06	1044	269.69	292.58	882	259.71	275.77
assembly_00299_gene	gnl.Prokka.assembly_1[-]271908-273128	2601	429.4	456.6	1693	405.11	439.49	1666	454.4	482.5
assembly_01858_gene	gnl.Prokka.assembly_1[+]1711182-1711700	2318	900.28	957.31	1112	625.99	679.12	1228	787.97	836.7
assembly_01005_gene	gnl.Prokka.assembly_1[-]932895-933413	2	0.78	0.83	1	0.56	0.61	0	0	0
assembly_00470_gene	gnl.Prokka.assembly_1[-]430199-430429	40	34.91	37.12	31	39.21	42.54	21	30.28	32.15
assembly_02181_gene	gnl.Prokka.assembly_2[+]86553-88364	343	38.15	40.57	245	39.51	42.86	252	46.32	49.18
assembly_00155_gene	gnl.Prokka.assembly_1[+]136628-137497	717	166.13	176.65	414	139.03	150.83	334	127.85	135.76
assembly_01950_gene	gnl.Prokka.assembly_1[+]1799632-1800084	142	63.19	67.19	79	50.96	55.28	77	56.61	60.11
assembly_00027_gene	gnl.Prokka.assembly_1[-]28621-30447	18039	1990.25	2116.32	14834	2372.2	2573.52	12753	2324.63	2468.38
assembly_00793_gene	gnl.Prokka.assembly_1[-]734399-734752	246	140.08	148.95	645	532.34	577.52	644	605.85	643.31
assembly_02255_gene	gnl.Prokka.assembly_2[-]134104-135426	1167	177.81	189.07	509	112.41	121.95	409	102.95	109.32
assembly_00984_gene	gnl.Prokka.assembly_1[+]915701-916312	22	7.25	7.71	15	7.16	7.77	12	6.53	6.93
assembly_00904_gene	gnl.Prokka.assembly_1[+]841996-842655	1587	484.7	515.4	882	390.44	423.58	787	397.11	421.67
assembly_00246_gene	gnl.Prokka.assembly_1[+]223803-224255	892	396.92	422.06	348	224.44	243.49	288	211.73	224.82
assembly_01938_gene	gnl.Prokka.assembly_1[+]1786268-1787563	3947	613.9	652.79	4431	998.92	1083.69	2654	681.99	724.16
assembly_01290_gene	gnl.Prokka.assembly_1[-]1207400-1208692	1232	192.06	204.23	631	142.58	154.68	704	181.33	192.54
assembly_01940_gene	gnl.Prokka.assembly_1[-]1787865-1788854	383	77.98	82.92	227	66.99	72.68	185	62.23	66.08
assembly_01822_gene	gnl.Prokka.assembly_1[-]1677810-1678346	178	66.82	71.05	119	64.75	70.24	95	58.92	62.56
assembly_01526_gene	gnl.Prokka.assembly_1[+]1433348-1433782	644	298.43	317.33	840	564.19	612.07	686	525.18	557.66
assembly_00714_gene	gnl.Prokka.assembly_1[+]659896-660690	1135	287.78	306.01	581	213.52	231.64	499	209.03	221.96
assembly_01377_gene	gnl.Prokka.assembly_1[+]1295498-1296337	768	184.3	195.97	454	157.91	171.31	446	176.83	187.76
assembly_01266_gene	gnl.Prokka.assembly_1[-]1186352-1187497	1434	252.23	268.21	614	156.54	169.82	710	206.32	219.08
assembly_01263_gene	gnl.Prokka.assembly_1[-]1184697-1184969	249	183.85	195.5	166	177.65	192.73	155	189.08	200.77
assembly_00336_gene	gnl.Prokka.assembly_1[-]307674-308312	862	271.92	289.14	490	224.04	243.05	505	263.2	279.47
assembly_01662_gene	gnl.Prokka.assembly_1[+]1553676-1554863	1017	172.56	183.49	871	214.21	232.39	730	204.64	217.29
assembly_02257_gene	gnl.Prokka.assembly_2[-]136021-136557	852	319.81	340.07	564	306.86	332.9	603	373.96	397.08
assembly_01355_gene	gnl.Prokka.assembly_1[-]1274279-1277179	1607	111.66	118.73	719	72.41	78.56	724	83.11	88.25
assembly_01213_gene	gnl.Prokka.assembly_1[-]1137370-1137831	5340	2329.87	2477.46	3339	2111.58	2290.78	3246	2339.84	2484.53
assembly_00680_gene	gnl.Prokka.assembly_1[-]628663-629031	1097	599.26	637.22	477	377.68	409.73	486	438.62	465.74
assembly_00444_gene	gnl.Prokka.assembly_1[+]408105-408890	524	134.38	142.89	459	170.62	185.1	265	112.28	119.22
assembly_00771_gene	gnl.Prokka.assembly_1[+]713534-713635	258	509.86	542.16	102	292.16	316.96	150	489.75	520.03
assembly_01534_gene	gnl.Prokka.assembly_1[-]1440099-1440521	1001	477.01	507.23	1949	1346.18	1460.43	1133	892.01	947.17
assembly_01989_gene	gnl.Prokka.assembly_1[-]1834154-1834999	2493	594	631.63	1374	474.51	514.78	1339	527.1	559.69
assembly_01143_gene	gnl.Prokka.assembly_1[+]1068401-1069249	947	224.84	239.08	501	172.41	187.04	426	167.11	177.44
assembly_01027_gene	gnl.Prokka.assembly_1[+]953949-955706	1639	187.93	199.83	408	67.81	73.56	408	77.29	82.07
assembly_00004_gene	gnl.Prokka.assembly_1[+]4048-5472	3799	537.39	571.43	4609	944.98	1025.18	3186	744.58	790.62
assembly_00629_gene	gnl.Prokka.assembly_1[-]580508-581443	1158	249.38	265.18	970	302.78	328.48	683	243.01	258.04
assembly_02201_gene	gnl.Prokka.assembly_2[+]99293-100174	537	122.73	130.5	217	71.88	77.98	146	55.13	58.54
assembly_01979_gene	gnl.Prokka.assembly_1[-]1821932-1822996	126	23.85	25.36	106	29.08	31.55	122	38.15	40.51
assembly_01043_gene	gnl.Prokka.assembly_1[-]968984-970279	333	51.79	55.07	185	41.71	45.25	196	50.37	53.48
assembly_01974_gene	gnl.Prokka.assembly_1[+]1818992-1820215	427	70.32	74.77	309	73.76	80.02	261	71.01	75.4
assembly_01988_gene	gnl.Prokka.assembly_1[-]1833494-1834144	474	146.76	156.06	237	106.36	115.39	210	107.43	114.07
assembly_01259_gene	gnl.Prokka.assembly_1[+]1181416-1181874	394	173.03	183.99	216	137.49	149.16	165	119.72	127.12
assembly_02146_gene	gnl.Prokka.assembly_2[-]60167-60400	11	9.48	10.08	4	5	5.42	8	11.39	12.09
assembly_01874_gene	gnl.Prokka.assembly_1[+]1720158-1721588	970	136.63	145.29	1059	216.22	234.57	952	221.55	235.25
assembly_02147_gene	gnl.Prokka.assembly_2[-]60608-60946	40	23.78	25.29	48	41.37	44.88	40	39.3	41.73
assembly_00016_gene	gnl.Prokka.assembly_1[-]16311-17720	2884	412.29	438.41	2379	492.95	534.79	2030	479.46	509.11
assembly_01585_gene	gnl.Prokka.assembly_1[-]1488784-1489347	2387	853.11	907.15	1012	524.24	568.73	919	542.64	576.2
assembly_01913_gene	gnl.Prokka.assembly_1[-]1758944-1759981	3955	768.04	816.69	2937	826.68	896.84	2600	834.18	885.76
assembly_00799_gene	gnl.Prokka.assembly_1[-]742204-742638	79	36.61	38.93	75	50.37	54.65	39	29.85	31.7
assembly_00720_gene	gnl.Prokka.assembly_1[-]667054-668103	141	27.07	28.78	317	88.2	95.69	134	42.5	45.13
assembly_01665_gene	gnl.Prokka.assembly_1[+]1556589-1558493	14784	1564.34	1663.43	10685	1638.74	1777.82	11015	1925.62	2044.69
assembly_00748_gene	gnl.Prokka.assembly_1[-]690734-691438	8	2.29	2.43	4	1.66	1.8	8	3.78	4.01
assembly_00619_gene	gnl.Prokka.assembly_1[-]570576-571418	416	99.47	105.77	300	103.98	112.8	234	92.44	98.16
assembly_01347_gene	gnl.Prokka.assembly_1[+]1266689-1267837	1793	314.55	334.48	1137	289.11	313.65	1006	291.58	309.61
assembly_00077_gene	gnl.Prokka.assembly_1[-]69403-70623	3612	596.3	634.07	2531	605.63	657.03	2151	586.68	622.96
assembly_01887_gene	gnl.Prokka.assembly_1[+]1733789-1734316	326	124.46	132.34	279	154.39	167.49	236	148.86	158.06
assembly_01616_gene	gnl.Prokka.assembly_1[+]1512989-1513738	548	147.28	156.61	355	138.29	150.03	304	134.98	143.33
assembly_00099_gene	gnl.Prokka.assembly_1[+]87633-90323	16147	1209.51	1286.13	10896	1183	1283.4	9755	1207.24	1281.89
assembly_01849_gene	gnl.Prokka.assembly_1[-]1700443-1701789	288	43.1	45.83	290	62.9	68.24	205	50.69	53.82
assembly_01019_gene	gnl.Prokka.assembly_1[+]945670-946569	1440	322.52	342.95	103	33.43	36.27	257	95.1	100.98
assembly_01667_gene	gnl.Prokka.assembly_1[-]1559511-1560062	445	162.5	172.79	369	195.31	211.88	226	136.35	144.78
assembly_01700_gene	gnl.Prokka.assembly_1[-]1584512-1584982	438	187.45	199.32	180	111.65	121.13	159	112.43	119.38
assembly_01789_gene	gnl.Prokka.assembly_1[-]1650432-1650815	3	1.57	1.67	2	1.52	1.65	1	0.87	0.92
assembly_01863_gene	gnl.Prokka.assembly_1[-]1715091-1715432	2679	1579	1679.02	1313	1121.69	1216.88	1340	1304.84	1385.53
assembly_01221_gene	gnl.Prokka.assembly_1[-]1144878-1145000	13	21.3	22.65	7	16.63	18.04	8	21.66	23
assembly_00140_gene	gnl.Prokka.assembly_1[+]128149-128313	347	423.92	450.77	309	547.15	593.59	201	405.68	430.77
assembly_01268_gene	gnl.Prokka.assembly_1[-]1188528-1189043	213	83.21	88.48	102	57.76	62.66	116	74.87	79.5
assembly_00396_gene	gnl.Prokka.assembly_1[+]362363-362995	1171	372.9	396.52	732	337.87	366.54	638	335.65	356.41
assembly_02253_gene	gnl.Prokka.assembly_2[+]131492-132187	9	2.6	2.77	3	1.26	1.37	7	3.35	3.56
assembly_00965_gene	gnl.Prokka.assembly_1[+]899012-899260	613	496.25	527.68	488	572.6	621.2	479	640.65	680.26
assembly_00176_gene	gnl.Prokka.assembly_1[+]154288-155397	3316	602.18	640.32	2677	704.62	764.42	2179	653.75	694.18
assembly_00516_gene	gnl.Prokka.assembly_1[+]471766-472470	473	135.24	143.81	314	130.13	141.17	191	90.22	95.8
assembly_00616_gene	gnl.Prokka.assembly_1[-]566995-568695	1648	195.29	207.66	845	145.14	157.46	794	155.45	165.06
assembly_01631_gene	gnl.Prokka.assembly_1[+]1525994-1526557	1768	631.88	671.91	972	503.53	546.26	808	477.11	506.61
assembly_00249_gene	gnl.Prokka.assembly_1[+]225385-226224	822	197.25	209.75	349	121.39	131.69	262	103.88	110.3
assembly_00704_gene	gnl.Prokka.assembly_1[-]652421-653815	5121	739.97	786.84	2742	574.28	623.02	2271	542.16	575.68
assembly_01261_gene	gnl.Prokka.assembly_1[+]1183603-1184142	266	99.29	105.58	166	89.82	97.44	148	91.28	96.92
assembly_00659_gene	gnl.Prokka.assembly_1[+]608829-610043	1206	200.08	212.75	1396	335.69	364.18	986	270.26	286.97
assembly_02295_gene	gnl.Prokka.assembly_2[+]168970-170274	673	103.95	110.54	870	194.78	211.31	883	225.34	239.27
assembly_00512_gene	gnl.Prokka.assembly_1[+]467266-468852	12240	1554.67	1653.15	9229	1699.07	1843.26	7792	1635.13	1736.24
assembly_00763_gene	gnl.Prokka.assembly_1[-]706699-707862	2584	447.48	475.83	2149	539.4	585.18	1836	525.29	557.77
assembly_01147_gene	gnl.Prokka.assembly_1[+]1072083-1072781	1329	383.25	407.53	592	247.44	268.44	446	212.49	225.63
assembly_00215_gene	gnl.Prokka.assembly_1[+]196582-196821	1669	1401.77	1490.57	2038	2480.99	2691.54	2121	2943.14	3125.13
assembly_02290_gene	gnl.Prokka.assembly_2[+]164297-165001	167	47.75	50.77	100	41.44	44.96	78	36.84	39.12
assembly_01183_gene	gnl.Prokka.assembly_1[-]1108027-1110012	2986	303.07	322.27	1443	212.28	230.3	1135	190.32	202.09
assembly_01532_gene	gnl.Prokka.assembly_1[+]1437973-1439655	897	107.43	114.24	176	30.56	33.15	339	67.08	71.23
assembly_00502_gene	gnl.Prokka.assembly_1[-]456710-457741	1073	209.58	222.86	568	160.8	174.45	539	173.93	184.69
assembly_00686_gene	gnl.Prokka.assembly_1[+]632762-632986	757	678.18	721.14	523	679.12	736.76	370	547.65	581.51
assembly_00457_gene	gnl.Prokka.assembly_1[-]419108-419587	1805	758	806.02	1145	696.94	756.09	1063	737.52	783.12
assembly_01779_gene	gnl.Prokka.assembly_1[+]1644819-1645091	110	81.22	86.37	72	77.05	83.59	66	80.51	85.49
assembly_00304_gene	gnl.Prokka.assembly_1[+]277426-278559	473	84.07	89.4	337	86.82	94.19	203	59.61	63.3
assembly_00008_gene	gnl.Prokka.assembly_1[-]8913-9557	4824	1507.58	1603.08	3525	1596.73	1732.24	2117	1093.05	1160.64
assembly_01573_gene	gnl.Prokka.assembly_1[+]1479838-1480512	2574	768.67	817.36	1062	459.68	498.69	896	442.06	469.4
assembly_00499_gene	gnl.Prokka.assembly_1[+]454104-454634	555	210.68	224.03	240	132.05	143.26	274	171.84	182.47
assembly_00523_gene	gnl.Prokka.assembly_1[+]476825-477133	880	574.06	610.42	405	382.94	415.44	371	399.85	424.57
assembly_00060_gene	gnl.Prokka.assembly_1[+]52848-53765	2931	643.58	684.35	1416	450.66	488.91	1189	431.34	458.01
assembly_00930_gene	gnl.Prokka.assembly_1[-]863427-864128	2000	574.28	610.66	1342	558.53	605.93	1039	492.9	523.38
assembly_01482_gene	gnl.Prokka.assembly_1[-]1393743-1394177	50	23.17	24.64	53	35.6	38.62	38	29.09	30.89
assembly_01596_gene	gnl.Prokka.assembly_1[+]1499433-1501019	1938	246.16	261.75	769	141.57	153.59	769	161.37	171.35
assembly_02355_gene	gnl.Prokka.assembly_2[-]224875-225393	0	0	0	0	0	0	0	0	0
assembly_02321_gene	gnl.Prokka.assembly_2[+]192694-193086	7	3.59	3.82	7	5.21	5.65	3	2.54	2.7
assembly_00103_gene	gnl.Prokka.assembly_1[+]94205-95593	834	121.03	128.7	820	172.48	187.12	674	161.6	171.59
assembly_00049_gene	gnl.Prokka.assembly_1[-]44785-45588	965	241.93	257.26	463	168.25	182.53	436	180.59	191.76
assembly_01169_gene	gnl.Prokka.assembly_1[-]1094345-1094893	172	63.15	67.15	108	57.47	62.35	84	50.96	54.11
assembly_00399_gene	gnl.Prokka.assembly_1[-]364936-365532	242	81.71	86.89	96	46.98	50.97	87	48.53	51.53
assembly_01663_gene	gnl.Prokka.assembly_1[+]1554949-1556079	1336	238.11	253.19	848	219.06	237.65	671	197.58	209.8
assembly_01395_gene	gnl.Prokka.assembly_1[+]1315402-1315839	49	22.55	23.98	16	10.67	11.58	14	10.64	11.3
assembly_00272_gene	gnl.Prokka.assembly_1[-]245344-246228	1283	292.23	310.74	771	254.53	276.13	554	208.47	221.36
assembly_02122_gene	gnl.Prokka.assembly_2[+]44583-44828	1	0.82	0.87	1	1.19	1.29	0	0	0
assembly_01714_gene	gnl.Prokka.assembly_1[-]1595807-1597675	66653	7188.6	7643.96	60114	9397.2	10194.7	48164	8582.11	9112.79
assembly_01598_gene	gnl.Prokka.assembly_1[-]1501882-1502838	245	51.6	54.87	266	81.21	88.1	159	55.33	58.75
assembly_00780_gene	gnl.Prokka.assembly_1[-]721255-722274	218	43.08	45.81	94	26.92	29.21	87	28.4	30.16
assembly_00169_gene	gnl.Prokka.assembly_1[+]148482-149273	169	43.02	45.74	103	38	41.22	90	37.84	40.18
assembly_01335_gene	gnl.Prokka.assembly_1[+]1254083-1256395	880	76.69	81.55	663	83.74	90.85	568	81.78	86.84
assembly_00282_gene	gnl.Prokka.assembly_1[-]252418-253422	397	79.63	84.67	212	61.63	66.86	142	47.05	49.96
assembly_01192_gene	gnl.Prokka.assembly_1[-]1114819-1115721	1850	412.97	439.13	1183	382.77	415.25	937	345.57	366.94
assembly_02093_gene	gnl.Prokka.assembly_2[+]14482-16194	286	33.66	35.79	223	38.03	41.26	155	30.14	32
assembly_01936_gene	gnl.Prokka.assembly_1[+]1784060-1784812	6633	1775.61	1888.09	6562	2546.09	2762.17	5734	2535.97	2692.78
assembly_01410_gene	gnl.Prokka.assembly_1[-]1333641-1334774	8886	1579.53	1679.58	5128	1321.19	1433.32	4767	1399.95	1486.52
assembly_00258_gene	gnl.Prokka.assembly_1[+]233492-234385	897	202.25	215.06	348	113.73	123.38	344	128.15	136.07
assembly_01556_gene	gnl.Prokka.assembly_1[-]1460115-1461299	9426	1603.4	1704.97	4622	1139.58	1236.29	4310	1211.27	1286.17
assembly_01889_gene	gnl.Prokka.assembly_1[-]1734682-1735749	1062	200.44	213.14	478	130.76	141.86	478	149.05	158.27
assembly_00221_gene	gnl.Prokka.assembly_1[+]200876-201517	2418	759.2	807.29	1125	511.98	555.43	1184	614.18	652.16
assembly_00095_gene	gnl.Prokka.assembly_1[+]85122-85490	353	192.83	205.05	192	152.02	164.92	159	143.5	152.37
assembly_02012_gene	gnl.Prokka.assembly_1[-]1851684-1852862	806	137.8	146.53	520	128.86	139.8	513	144.91	153.87
assembly_01621_gene	gnl.Prokka.assembly_1[-]1517616-1518056	5334	2438.08	2592.52	3629	2404.26	2608.3	3562	2689.9	2856.23
assembly_01311_gene	gnl.Prokka.assembly_1[-]1224851-1225072	478	434.02	461.51	182	239.52	259.85	204	306.03	324.95
assembly_00289_gene	gnl.Prokka.assembly_1[+]261601-263307	2723	321.55	341.92	1793	306.89	332.93	1377	268.65	285.26
assembly_02057_gene	gnl.Prokka.assembly_1[+]1888471-1888698	96	84.87	90.25	61	78.17	84.8	55	80.33	85.3
assembly_00513_gene	gnl.Prokka.assembly_1[+]468857-469495	738	232.8	247.55	448	204.84	222.22	395	205.86	218.59
assembly_00046_gene	gnl.Prokka.assembly_1[+]43495-43827	372	225.19	239.45	206	180.74	196.08	201	201.02	213.45
assembly_01581_gene	gnl.Prokka.assembly_1[+]1485871-1486434	1045	373.48	397.14	1190	616.45	668.77	761	449.35	477.14
assembly_01432_gene	gnl.Prokka.assembly_1[+]1351762-1352472	226	64.07	68.13	143	58.76	63.75	129	60.42	64.16
assembly_01947_gene	gnl.Prokka.assembly_1[+]1796211-1797545	309	46.65	49.61	154	33.7	36.56	184	45.9	48.74
assembly_00949_gene	gnl.Prokka.assembly_1[-]879161-880333	629	108.09	114.94	343	85.43	92.68	285	80.92	85.92
assembly_01978_gene	gnl.Prokka.assembly_1[+]1821165-1821935	645	168.63	179.31	402	152.33	165.26	320	138.22	146.77
assembly_00303_gene	gnl.Prokka.assembly_1[+]276746-277408	596	181.2	192.68	503	221.66	240.47	289	145.16	154.14
assembly_00180_gene	gnl.Prokka.assembly_1[+]158132-158563	573	267.36	284.3	852	576.22	625.12	509	392.39	416.65
assembly_01422_gene	gnl.Prokka.assembly_1[+]1343552-1345969	6352	529.53	563.07	4584	553.88	600.89	4069	560.42	595.07
assembly_01349_gene	gnl.Prokka.assembly_1[+]1268053-1268406	602	342.79	364.5	304	250.9	272.19	246	231.43	245.74
assembly_02268_gene	gnl.Prokka.assembly_2[+]144185-145048	4755	1109.36	1179.63	7642	2584.2	2803.51	5236	2018.21	2143.01
assembly_00146_gene	gnl.Prokka.assembly_1[+]130483-130788	4104	2703.46	2874.71	5709	5450.93	5913.53	5006	5448.17	5785.06
assembly_01603_gene	gnl.Prokka.assembly_1[-]1505483-1507195	2162	254.4	270.52	1154	196.83	213.53	834	162.14	172.17
assembly_00543_gene	gnl.Prokka.assembly_1[-]492692-493747	3398	648.62	689.71	1774	490.82	532.47	1481	467.06	495.94
assembly_01018_gene	gnl.Prokka.assembly_1[-]944149-945522	100	14.67	15.6	53	11.27	12.23	41	9.94	10.55
assembly_00530_gene	gnl.Prokka.assembly_1[-]479855-480952	794	145.77	155	479	127.45	138.27	367	111.32	118.2
assembly_01484_gene	gnl.Prokka.assembly_1[-]1394990-1395550	68	24.43	25.98	96	50	54.24	46	27.31	29
assembly_00924_gene	gnl.Prokka.assembly_1[+]858735-859268	481	181.57	193.07	256	140.06	151.95	214	133.46	141.71
assembly_00689_gene	gnl.Prokka.assembly_1[-]635841-637073	3948	645.43	686.31	2661	630.54	684.05	2166	585.02	621.2
assembly_00248_gene	gnl.Prokka.assembly_1[+]224648-225388	598	162.68	172.98	242	95.42	103.52	177	79.55	84.47
assembly_00631_gene	gnl.Prokka.assembly_1[-]581690-582394	5596	1600.01	1701.36	3070	1272.28	1380.25	2538	1198.9	1273.04
assembly_01413_gene	gnl.Prokka.assembly_1[+]1336605-1337477	606	139.93	148.79	374	125.17	135.79	320	122.07	129.62
assembly_01463_gene	gnl.Prokka.assembly_1[+]1379084-1379824	855	232.59	247.32	506	199.51	216.44	424	190.56	202.34
assembly_00746_gene	gnl.Prokka.assembly_1[+]689142-689972	277	67.19	71.45	87	30.58	33.18	82	32.86	34.89
assembly_02245_gene	gnl.Prokka.assembly_2[+]118701-120425	607	70.93	75.42	121	20.49	22.23	112	21.62	22.96
assembly_00840_gene	gnl.Prokka.assembly_1[-]780206-780955	2710	728.35	774.49	1508	587.45	637.31	1519	674.49	716.2
assembly_02309_gene	gnl.Prokka.assembly_2[-]182671-182868	64	65.15	69.28	22	32.46	35.22	12	20.18	21.43
assembly_00459_gene	gnl.Prokka.assembly_1[-]421507-422211	144	41.17	43.78	135	55.95	60.7	106	50.07	53.17
assembly_02397_gene	gnl.Prokka.assembly_2[+]241785-244202	2318	193.24	205.48	1071	129.41	140.39	1169	161	170.96
assembly_01768_gene	gnl.Prokka.assembly_1[-]1636055-1636885	2427	588.71	626	4413	1551.54	1683.22	1975	791.5	840.44
assembly_02054_gene	gnl.Prokka.assembly_1[-]1886673-1887167	1434	583.95	620.94	1315	776.16	842.03	1074	722.57	767.25
assembly_00033_gene	gnl.Prokka.assembly_1[-]33440-34354	1768	389.49	414.16	1752	559.43	606.91	1682	612.18	650.04
assembly_01131_gene	gnl.Prokka.assembly_1[-]1057745-1058416	235	70.49	74.96	248	107.82	116.97	147	72.85	77.35
assembly_01021_gene	gnl.Prokka.assembly_1[+]947303-948850	1306	170.06	180.83	108	20.38	22.11	179	38.51	40.89
assembly_01138_gene	gnl.Prokka.assembly_1[-]1065834-1066826	265	53.79	57.2	258	75.91	82.35	216	72.44	76.92
assembly_00187_gene	gnl.Prokka.assembly_1[+]163744-164640	413	92.81	98.69	347	113.03	122.62	254	94.3	100.13
assembly_00354_gene	gnl.Prokka.assembly_1[-]324631-324939	829	540.79	575.05	633	598.52	649.31	598	644.5	684.35
assembly_02028_gene	gnl.Prokka.assembly_1[-]1863833-1865029	1397	235.26	250.16	1133	276.55	300.02	826	229.81	244.02
assembly_00862_gene	gnl.Prokka.assembly_1[-]800795-801247	273	121.48	129.17	117	75.46	81.86	118	86.75	92.11
assembly_00737_gene	gnl.Prokka.assembly_1[-]680829-682073	1240	200.76	213.48	374	87.77	95.22	326	87.2	92.59
assembly_01961_gene	gnl.Prokka.assembly_1[-]1807455-1808609	583	101.74	108.19	313	79.18	85.9	208	59.97	63.68
assembly_01800_gene	gnl.Prokka.assembly_1[+]1660193-1662376	7401	683.08	726.35	4443	594.37	644.81	4734	721.86	766.5
assembly_01856_gene	gnl.Prokka.assembly_1[-]1708859-1709758	2177	487.58	518.47	1173	380.79	413.11	1050	388.53	412.56
assembly_01470_gene	gnl.Prokka.assembly_1[-]1383999-1384535	1274	478.22	508.51	892	485.31	526.5	706	437.84	464.91
assembly_02229_gene	gnl.Prokka.assembly_2[+]112878-113831	2	0.42	0.45	1	0.3	0.33	0	0	0
assembly_00275_gene	gnl.Prokka.assembly_1[+]247890-248510	855	277.53	295.11	427	200.89	217.94	373	200.03	212.4
assembly_00089_gene	gnl.Prokka.assembly_1[-]81205-82113	2933	650.4	691.6	1488	478.27	518.86	1479	541.85	575.36
assembly_00185_gene	gnl.Prokka.assembly_1[-]162203-162505	524	348.6	370.68	661	637.37	691.46	611	671.55	713.08
assembly_00872_gene	gnl.Prokka.assembly_1[-]809847-810383	864	324.32	344.86	702	381.94	414.35	616	382.02	405.64
assembly_01575_gene	gnl.Prokka.assembly_1[-]1481894-1482154	178	137.47	146.18	62	69.4	75.29	55	70.18	74.52
assembly_02060_gene	gnl.Prokka.assembly_1[-]1891509-1892258	1964	527.85	561.29	964	375.53	407.4	886	393.41	417.74
assembly_02276_gene	gnl.Prokka.assembly_2[+]150113-150442	458	279.76	297.48	363	321.39	348.66	273	275.5	292.54
assembly_00596_gene	gnl.Prokka.assembly_1[-]540673-541287	11804	3868.9	4113.98	14034	6667.12	7232.94	12188	6599.91	7008.02
assembly_01658_gene	gnl.Prokka.assembly_1[-]1549806-1550468	686	208.57	221.78	118	52	56.41	198	99.46	105.61
assembly_01217_gene	gnl.Prokka.assembly_1[+]1141869-1142108	232	194.86	207.2	104	126.61	137.35	97	134.6	142.92
assembly_01820_gene	gnl.Prokka.assembly_1[+]1676900-1677106	374	364.2	387.27	239	337.33	365.96	219	352.33	374.12
assembly_01895_gene	gnl.Prokka.assembly_1[-]1739602-1740792	446	75.49	80.27	224	54.95	59.61	266	74.38	78.98
assembly_01084_gene	gnl.Prokka.assembly_1[+]1015194-1016075	11	2.51	2.67	7	2.32	2.52	3	1.13	1.2
assembly_01953_gene	gnl.Prokka.assembly_1[+]1802646-1803569	664	144.85	154.03	600	189.72	205.82	411	148.13	157.29
assembly_02227_gene	gnl.Prokka.assembly_2[-]112316-112516	29	29.09	30.93	14	20.35	22.08	13	21.54	22.87
assembly_00781_gene	gnl.Prokka.assembly_1[-]722244-722918	190	56.74	60.33	83	35.92	38.97	80	39.47	41.91
assembly_01777_gene	gnl.Prokka.assembly_1[+]1643219-1644343	1235	221.28	235.3	987	256.33	278.08	734	217.28	230.72
assembly_00642_gene	gnl.Prokka.assembly_1[-]593558-594406	420	99.72	106.04	204	70.2	76.16	127	49.82	52.9
assembly_00833_gene	gnl.Prokka.assembly_1[-]771670-772731	1090	206.88	219.99	640	176.07	191.01	528	165.57	175.81
assembly_01640_gene	gnl.Prokka.assembly_1[-]1532023-1532685	1117	339.61	361.12	1149	506.34	549.31	703	353.12	374.96
assembly_01675_gene	gnl.Prokka.assembly_1[+]1566513-1568228	4276	502.29	534.11	2107	358.74	389.18	2091	405.81	430.9
assembly_01265_gene	gnl.Prokka.assembly_1[-]1185608-1186234	25805	8296.03	8821.54	17617	8209.12	8905.8	19183	10189	10819
assembly_00698_gene	gnl.Prokka.assembly_1[-]647296-648393	704	129.24	137.43	720	191.58	207.84	529	160.45	170.37
assembly_02200_gene	gnl.Prokka.assembly_2[+]97003-99291	718	63.23	67.23	177	22.59	24.51	180	26.19	27.81
assembly_00119_gene	gnl.Prokka.assembly_1[+]111918-112838	351	76.82	81.69	244	77.4	83.97	198	71.59	76.02
assembly_01876_gene	gnl.Prokka.assembly_1[+]1723239-1724765	927	122.37	130.12	774	148.09	160.66	532	116.03	123.2
assembly_00958_gene	gnl.Prokka.assembly_1[+]889852-892143	10208	897.76	954.63	2012	256.47	278.24	4516	656.17	696.75
assembly_01260_gene	gnl.Prokka.assembly_1[+]1181871-1183598	1177	137.3	146	739	124.95	135.55	519	100.02	106.21
assembly_00333_gene	gnl.Prokka.assembly_1[-]305611-305970	474	265.41	282.22	606	491.81	533.55	523	483.81	513.73
assembly_02297_gene	gnl.Prokka.assembly_2[+]171237-172094	79	18.56	19.74	149	50.73	55.04	138	53.57	56.88
assembly_00649_gene	gnl.Prokka.assembly_1[-]599922-600272	345	198.13	210.68	192	159.82	173.38	245	232.46	246.83
assembly_01509_gene	gnl.Prokka.assembly_1[-]1417818-1418807	743	151.29	160.87	319	94.14	102.13	265	89.15	94.66
assembly_00963_gene	gnl.Prokka.assembly_1[+]897731-898144	252	122.7	130.47	183	129.15	140.11	124	99.75	105.92
assembly_01567_gene	gnl.Prokka.assembly_1[-]1472548-1473432	3522	802.2	853.01	2228	735.54	797.96	2052	772.17	819.92
assembly_00293_gene	gnl.Prokka.assembly_1[+]267191-267916	27	7.5	7.97	28	11.26	12.22	27	12.38	13.15
assembly_02172_gene	gnl.Prokka.assembly_2[-]80202-80822	12	3.89	4.14	27	12.7	13.78	14	7.51	7.97
assembly_01819_gene	gnl.Prokka.assembly_1[+]1676487-1676903	1186	573.3	609.62	761	533.19	578.44	727	580.6	616.5
assembly_00555_gene	gnl.Prokka.assembly_1[+]503883-504269	546	284.4	302.41	507	382.77	415.25	341	293.44	311.59
assembly_00711_gene	gnl.Prokka.assembly_1[+]657726-658412	308	90.38	96.1	157	66.77	72.44	159	77.07	81.84
assembly_00486_gene	gnl.Prokka.assembly_1[+]444632-445828	1483	249.74	265.56	785	191.61	207.87	652	181.4	192.62
assembly_01807_gene	gnl.Prokka.assembly_1[+]1667488-1668006	140	54.38	57.82	89	50.1	54.35	86	55.19	58.6
assembly_00263_gene	gnl.Prokka.assembly_1[+]238108-238341	28	24.12	25.65	63	78.66	85.34	72	102.47	108.81
assembly_00820_gene	gnl.Prokka.assembly_1[-]759428-760150	35	9.76	10.38	33	13.34	14.47	30	13.82	14.67
assembly_00630_gene	gnl.Prokka.assembly_1[+]581492-581689	20	20.36	21.65	15	22.13	24.01	18	30.28	32.15
assembly_02273_gene	gnl.Prokka.assembly_2[+]148253-148900	1070	332.85	353.93	1241	559.53	607.02	830	426.56	452.94
assembly_00360_gene	gnl.Prokka.assembly_1[+]330618-330938	1108	695.78	739.85	519	472.38	512.47	499	517.7	549.71
assembly_01490_gene	gnl.Prokka.assembly_1[-]1399471-1399899	93	43.7	46.47	33	22.47	24.38	18	13.98	14.84
assembly_01165_gene	gnl.Prokka.assembly_1[+]1089790-1090977	10082	1710.66	1819.02	9849	2422.19	2627.75	8178	2292.51	2434.27
assembly_02161_gene	gnl.Prokka.assembly_2[+]71199-72077	185	42.42	45.11	84	27.92	30.29	70	26.52	28.16
assembly_00257_gene	gnl.Prokka.assembly_1[+]232824-233495	618	185.38	197.12	274	119.13	129.24	241	119.43	126.82
assembly_01065_gene	gnl.Prokka.assembly_1[+]995513-997339	348	38.4	40.83	184	29.42	31.92	158	28.8	30.58
assembly_00445_gene	gnl.Prokka.assembly_1[+]408938-409864	269	58.49	62.2	206	64.93	70.44	113	40.6	43.11
assembly_00181_gene	gnl.Prokka.assembly_1[+]158585-159700	547	98.8	105.06	301	78.8	85.49	263	78.49	83.34
assembly_00723_gene	gnl.Prokka.assembly_1[-]669562-670230	370	111.49	118.55	449	196.09	212.73	339	168.75	179.19
assembly_01935_gene	gnl.Prokka.assembly_1[+]1781221-1783977	7135	521.67	554.71	2280	241.61	262.12	2646	319.62	339.38
assembly_02027_gene	gnl.Prokka.assembly_1[-]1862793-1863833	1428	276.51	294.03	832	233.51	253.33	613	196.1	208.23
assembly_00688_gene	gnl.Prokka.assembly_1[-]634881-635831	2436	516.33	549.04	1299	399.08	432.95	1068	374	397.13
assembly_00581_gene	gnl.Prokka.assembly_1[+]529651-531171	4608	610.69	649.37	3542	680.38	738.12	3160	691.9	734.68
assembly_01970_gene	gnl.Prokka.assembly_1[-]1815657-1816334	125	37.17	39.52	59	25.42	27.58	38	18.67	19.82
assembly_00947_gene	gnl.Prokka.assembly_1[+]877418-878071	32	9.87	10.49	22	9.83	10.66	23	11.72	12.44
assembly_00322_gene	gnl.Prokka.assembly_1[-]294718-296538	13284	1470.45	1563.6	9932	1593.52	1728.76	8636	1579.37	1677.03
assembly_02333_gene	gnl.Prokka.assembly_2[+]203353-204273	4071	891	947.44	714	226.5	245.72	1154	417.28	443.08
assembly_02148_gene	gnl.Prokka.assembly_2[-]61019-61108	0	0	0	1	3.24	3.52	0	0	0
assembly_01630_gene	gnl.Prokka.assembly_1[+]1524483-1525994	3316	442.08	470.08	1941	375.06	406.89	1556	342.72	363.91
assembly_02338_gene	gnl.Prokka.assembly_2[+]210106-211032	3	0.65	0.69	2	0.63	0.68	1	0.36	0.38
assembly_00208_gene	gnl.Prokka.assembly_1[+]186473-187735	2798	446.56	474.85	3053	706.24	766.18	2655	700.07	743.36
assembly_01393_gene	gnl.Prokka.assembly_1[+]1313444-1314658	287	47.61	50.63	170	40.88	44.35	151	41.39	43.95
assembly_00888_gene	gnl.Prokka.assembly_1[-]825595-825948	213	121.29	128.97	65	53.65	58.2	91	85.61	90.9
assembly_01845_gene	gnl.Prokka.assembly_1[-]1697208-1698341	1488	264.5	281.25	1362	350.91	380.69	2980	875.15	929.27
assembly_01932_gene	gnl.Prokka.assembly_1[+]1777632-1778315	618	182.12	193.66	411	175.56	190.46	262	127.56	135.45
assembly_01780_gene	gnl.Prokka.assembly_1[+]1645103-1645387	548	387.59	412.14	345	353.67	383.69	262	306.15	325.08
assembly_01613_gene	gnl.Prokka.assembly_1[-]1509313-1509498	0	0	0	0	0	0	0	0	0
assembly_01776_gene	gnl.Prokka.assembly_1[-]1642630-1643037	1724	851.75	905.7	2332	1669.94	1811.66	1618	1320.68	1402.35
assembly_02329_gene	gnl.Prokka.assembly_2[-]200587-200730	16	22.4	23.82	3	6.08	6.6	4	9.25	9.82
assembly_02369_gene	gnl.Prokka.assembly_2[+]236160-237365	393	65.69	69.85	180	43.61	47.31	169	46.66	49.55
assembly_02357_gene	gnl.Prokka.assembly_2[+]225915-226643	430	118.9	126.43	146	58.51	63.48	136	62.13	65.97
assembly_01339_gene	gnl.Prokka.assembly_1[-]1258889-1260325	21407	3002.85	3193.06	25828	5251.29	5696.95	20671	4790.55	5086.78
assembly_01731_gene	gnl.Prokka.assembly_1[-]1614882-1616078	32360	5449.4	5794.59	30621	7474.07	8108.37	28665	7975.14	8468.29
assembly_01298_gene	gnl.Prokka.assembly_1[+]1212987-1214405	5921	841.1	894.38	3432	706.64	766.61	4387	1029.59	1093.26
assembly_00088_gene	gnl.Prokka.assembly_1[-]81006-81218	552	522.39	555.48	252	345.66	375	264	412.77	438.29
assembly_00366_gene	gnl.Prokka.assembly_1[+]334706-336241	271	35.57	37.82	158	30.05	32.6	110	23.85	25.32
assembly_01528_gene	gnl.Prokka.assembly_1[+]1435017-1435940	455	99.26	105.55	329	104.03	112.86	244	87.94	93.38
assembly_00745_gene	gnl.Prokka.assembly_1[+]688442-689170	403	111.43	118.49	142	56.91	61.74	143	65.33	69.37
assembly_00567_gene	gnl.Prokka.assembly_1[+]515010-515204	16	16.54	17.59	19	28.46	30.88	22	37.58	39.9
assembly_00584_gene	gnl.Prokka.assembly_1[+]531585-532580	3745	757.93	805.94	2881	845.12	916.84	2356	787.77	836.48
assembly_00488_gene	gnl.Prokka.assembly_1[+]446773-447513	45	12.24	13.02	30	11.83	12.83	17	7.64	8.11
assembly_00700_gene	gnl.Prokka.assembly_1[-]648980-649912	868	187.53	199.41	680	212.94	231.01	388	138.5	147.06
assembly_01450_gene	gnl.Prokka.assembly_1[+]1365916-1366794	4053	929.44	988.32	1643	546.11	592.46	1598	605.43	642.87
assembly_01280_gene	gnl.Prokka.assembly_1[-]1197139-1198701	1755	226.33	240.67	1880	351.43	381.25	1280	272.73	289.59
assembly_01718_gene	gnl.Prokka.assembly_1[+]1600394-1601110	736	206.91	220.02	461	187.85	203.79	350	162.57	172.62
assembly_01599_gene	gnl.Prokka.assembly_1[-]1502900-1503295	967	492.23	523.41	650	479.57	520.27	555	466.75	495.61
assembly_01507_gene	gnl.Prokka.assembly_1[-]1413922-1414836	993	218.75	232.61	481	153.59	166.62	443	161.24	171.21
assembly_02091_gene	gnl.Prokka.assembly_2[+]12682-13728	485	93.38	99.29	276	77.01	83.55	213	67.75	71.94
assembly_02198_gene	gnl.Prokka.assembly_2[-]95041-95625	0	0	0	0	0	0	0	0	0
assembly_00507_gene	gnl.Prokka.assembly_1[+]463090-464073	1779	364.43	387.52	1719	510.4	553.72	1104	373.65	396.75
assembly_00526_gene	gnl.Prokka.assembly_1[-]477736-479163	2281	321.98	342.38	1421	290.74	315.41	1201	280.09	297.41
assembly_00408_gene	gnl.Prokka.assembly_1[+]373119-373889	265	69.28	73.67	209	79.2	85.92	147	63.49	67.42
assembly_00381_gene	gnl.Prokka.assembly_1[-]346690-348039	279	41.66	44.3	181	39.18	42.5	141	34.78	36.93
assembly_00388_gene	gnl.Prokka.assembly_1[-]354531-355499	1134	235.9	250.84	438	132.06	143.27	361	124.07	131.74
assembly_00400_gene	gnl.Prokka.assembly_1[-]365520-365711	40	41.99	44.65	25	38.04	41.27	14	24.28	25.78
assembly_01080_gene	gnl.Prokka.assembly_1[+]1013017-1013661	638	199.39	212.02	460	208.37	226.05	395	203.95	216.56
assembly_00653_gene	gnl.Prokka.assembly_1[-]603814-604677	5055	1179.34	1254.05	2214	748.68	812.22	2402	925.85	983.1
assembly_01601_gene	gnl.Prokka.assembly_1[+]1503819-1504448	543	173.73	184.74	547	253.67	275.2	428	226.25	240.24
assembly_00495_gene	gnl.Prokka.assembly_1[+]452594-453004	236	115.75	123.08	123	87.44	94.86	70	56.72	60.23
assembly_00742_gene	gnl.Prokka.assembly_1[-]684780-686024	36776	5954.28	6331.45	12730	2987.38	3240.91	13724	3671.07	3898.07
assembly_02396_gene	gnl.Prokka.assembly_2[+]241457-241729	5	3.7	3.93	2	2.14	2.32	0	0	0
assembly_00636_gene	gnl.Prokka.assembly_1[+]586176-587837	427	51.79	55.07	215	37.79	41	234	46.89	49.79
assembly_00946_gene	gnl.Prokka.assembly_1[-]876653-877396	391	105.93	112.64	268	105.24	114.17	262	117.28	124.53
assembly_02263_gene	gnl.Prokka.assembly_2[+]139769-140869	771	141.16	150.1	767	203.54	220.81	602	182.09	193.35
assembly_02156_gene	gnl.Prokka.assembly_2[+]66853-67470	1117	364.33	387.41	706	333.77	362.1	685	369.13	391.96
assembly_01997_gene	gnl.Prokka.assembly_1[-]1840731-1841222	687	281.47	299.3	588	349.18	378.81	439	297.16	315.53
assembly_01458_gene	gnl.Prokka.assembly_1[-]1374054-1374623	366	129.43	137.63	179	91.75	99.54	101	59.01	62.66
assembly_01008_gene	gnl.Prokka.assembly_1[+]935731-935874	5	7	7.44	2	4.06	4.4	0	0	0
assembly_00697_gene	gnl.Prokka.assembly_1[-]646184-647275	825	152.28	161.93	1003	268.36	291.13	647	197.32	209.52
assembly_01357_gene	gnl.Prokka.assembly_1[-]1278298-1279308	1372	273.55	290.88	649	187.55	203.47	543	178.87	189.93
assembly_00014_gene	gnl.Prokka.assembly_1[-]14675-15307	2069	658.85	700.59	1006	464.33	503.74	895	470.87	499.99
assembly_01223_gene	gnl.Prokka.assembly_1[-]1145439-1146677	1656	269.41	286.48	1012	238.64	258.89	1050	282.23	299.68
assembly_01643_gene	gnl.Prokka.assembly_1[-]1534610-1535659	1026	196.96	209.44	428	119.09	129.2	431	136.7	145.15
assembly_00887_gene	gnl.Prokka.assembly_1[-]823866-825623	650	74.53	79.25	185	30.75	33.36	223	42.25	44.86
assembly_00409_gene	gnl.Prokka.assembly_1[-]373935-374477	884	328.16	348.95	536	288.4	312.88	535	328.12	348.41
assembly_01973_gene	gnl.Prokka.assembly_1[-]1818177-1818962	3907	1001.97	1065.44	2622	974.64	1057.35	2168	918.58	975.38
assembly_02026_gene	gnl.Prokka.assembly_1[-]1862015-1862782	1738	456.16	485.06	1222	464.88	504.33	959	415.86	441.57
assembly_02176_gene	gnl.Prokka.assembly_2[-]83230-83484	20	15.81	16.81	4	4.58	4.97	4	5.23	5.55
assembly_00193_gene	gnl.Prokka.assembly_1[-]171251-172798	5201	677.25	720.15	1980	373.7	405.42	2040	438.87	466.01
assembly_00928_gene	gnl.Prokka.assembly_1[-]861993-862817	854	208.66	221.88	592	209.65	227.44	458	184.88	196.31
assembly_01602_gene	gnl.Prokka.assembly_1[-]1504398-1505468	864	162.61	172.91	763	208.15	225.81	636	197.76	209.99
assembly_01227_gene	gnl.Prokka.assembly_1[+]1150503-1150919	168	81.21	86.35	69	48.35	52.45	45	35.94	38.16
assembly_01461_gene	gnl.Prokka.assembly_1[+]1376738-1378186	516	71.78	76.33	226	45.57	49.44	239	54.93	58.33
assembly_00382_gene	gnl.Prokka.assembly_1[-]348050-348607	33	11.92	12.68	14	7.33	7.95	9	5.37	5.7
assembly_01267_gene	gnl.Prokka.assembly_1[-]1187488-1188534	873	168.07	178.72	524	146.22	158.63	545	173.35	184.07
assembly_00042_gene	gnl.Prokka.assembly_1[+]41372-42139	580	152.23	161.87	237	90.16	97.81	213	92.36	98.07
assembly_00359_gene	gnl.Prokka.assembly_1[+]329523-330608	845	156.84	166.78	328	88.24	95.73	316	96.91	102.9
assembly_00703_gene	gnl.Prokka.assembly_1[-]651796-652311	364	142.19	151.2	259	146.65	159.1	196	126.5	134.32
assembly_01219_gene	gnl.Prokka.assembly_1[+]1142281-1143507	1515	248.88	264.65	1033	245.97	266.85	859	233.14	247.56
assembly_01644_gene	gnl.Prokka.assembly_1[-]1535695-1537149	1141	158.08	168.09	433	86.95	94.33	352	80.57	85.55
assembly_01198_gene	gnl.Prokka.assembly_1[+]1119557-1120147	1987	677.71	720.64	669	330.73	358.8	800	450.79	478.67
assembly_01340_gene	gnl.Prokka.assembly_1[-]1260336-1262072	22518	2613.15	2778.68	24478	4117.26	4466.68	18103	3470.82	3685.44
assembly_01770_gene	gnl.Prokka.assembly_1[-]1637224-1637841	1499	488.93	519.9	1861	879.81	954.48	838	451.59	479.51
assembly_02343_gene	gnl.Prokka.assembly_2[-]216580-216939	34	19.03	20.24	53	43.01	46.66	32	29.6	31.43
assembly_01690_gene	gnl.Prokka.assembly_1[+]1577243-1577797	108	39.23	41.71	61	32.11	34.84	51	30.6	32.49
assembly_00434_gene	gnl.Prokka.assembly_1[-]398202-399245	436	84.18	89.51	389	108.86	118.1	256	81.66	86.71
assembly_00376_gene	gnl.Prokka.assembly_1[+]342540-343832	2093	326.29	346.96	947	213.99	232.15	729	187.76	199.37
assembly_00229_gene	gnl.Prokka.assembly_1[-]205883-206320	482	221.82	235.87	373	248.81	269.93	249	189.32	201.03
assembly_01101_gene	gnl.Prokka.assembly_1[-]1029303-1029521	31	28.53	30.34	44	58.7	63.68	41	62.34	66.2
assembly_01971_gene	gnl.Prokka.assembly_1[+]1816365-1817630	944	150.31	159.83	438	101.08	109.66	452	118.9	126.25
assembly_01041_gene	gnl.Prokka.assembly_1[-]966867-967712	992	236.36	251.33	500	172.68	187.33	396	155.88	165.52
assembly_01891_gene	gnl.Prokka.assembly_1[+]1736208-1736612	27	13.44	14.29	21	15.15	16.44	17	13.98	14.84
assembly_01815_gene	gnl.Prokka.assembly_1[+]1671406-1672794	335	48.62	51.7	200	42.07	45.64	193	46.28	49.14
assembly_00101_gene	gnl.Prokka.assembly_1[+]91556-92923	4115	606.34	644.75	4110	877.79	952.28	3544	862.76	916.11
assembly_00702_gene	gnl.Prokka.assembly_1[-]651278-651796	27	10.49	11.15	18	10.13	10.99	16	10.27	10.9
assembly_01536_gene	gnl.Prokka.assembly_1[-]1442281-1443318	512	99.43	105.73	400	112.59	122.14	276	88.55	94.03
assembly_00262_gene	gnl.Prokka.assembly_1[-]236713-238011	313	48.57	51.65	1012	227.61	246.93	885	226.89	240.92
assembly_00861_gene	gnl.Prokka.assembly_1[+]799600-800820	13360	2205.59	2345.3	5498	1315.59	1427.24	6184	1686.68	1790.98
assembly_01543_gene	gnl.Prokka.assembly_1[-]1451914-1453074	1781	309.22	328.81	808	203.33	220.59	729	209.11	222.04
assembly_00784_gene	gnl.Prokka.assembly_1[-]724560-724928	1152	629.31	669.17	1168	924.8	1003.29	1139	1027.96	1091.53
assembly_01485_gene	gnl.Prokka.assembly_1[-]1395547-1397268	424	49.64	52.78	439	74.49	80.81	254	49.12	52.16
assembly_00105_gene	gnl.Prokka.assembly_1[+]96130-96393	257	196.23	208.66	150	166	180.09	156	196.79	208.96
assembly_02246_gene	gnl.Prokka.assembly_2[+]120488-122818	389	33.64	35.77	121	15.16	16.45	92	13.15	13.96
assembly_00831_gene	gnl.Prokka.assembly_1[-]769876-770571	1036	300.04	319.05	614	257.75	279.62	533	255.03	270.8
assembly_01201_gene	gnl.Prokka.assembly_1[+]1120950-1122638	13072	1560.08	1658.9	13306	2301.7	2497.04	14421	2843.45	3019.28
assembly_01885_gene	gnl.Prokka.assembly_1[-]1732692-1733291	326	109.52	116.46	200	97.39	105.65	159	88.25	93.71
assembly_01226_gene	gnl.Prokka.assembly_1[+]1149762-1150496	917	251.49	267.42	717	285.01	309.2	556	251.92	267.5
assembly_00610_gene	gnl.Prokka.assembly_1[-]561486-561896	456	223.64	237.81	306	217.53	235.99	263	213.1	226.28
assembly_00300_gene	gnl.Prokka.assembly_1[+]273161-274594	3450	484.96	515.68	2604	530.54	575.57	2151	499.54	530.43
assembly_01063_gene	gnl.Prokka.assembly_1[-]993485-993982	633	256.22	272.45	256	150.19	162.94	260	173.87	184.62
assembly_01158_gene	gnl.Prokka.assembly_1[-]1082570-1083055	287	119.04	126.58	231	138.87	150.66	251	171.99	182.63
assembly_00940_gene	gnl.Prokka.assembly_1[-]870868-872160	870	135.63	144.22	317	71.63	77.71	262	67.48	71.65
assembly_02120_gene	gnl.Prokka.assembly_2[-]41230-42075	33	7.86	8.36	12	4.15	4.5	7	2.76	2.93
assembly_01629_gene	gnl.Prokka.assembly_1[-]1523901-1524368	473	203.73	216.63	295	184.17	199.8	263	187.15	198.72
assembly_01545_gene	gnl.Prokka.assembly_1[-]1453537-1454169	2558	814.57	866.17	1102	508.64	551.81	1068	561.89	596.63
assembly_01993_gene	gnl.Prokka.assembly_1[-]1838272-1839306	6342	1235.15	1313.39	4789	1351.87	1466.6	3996	1285.77	1365.28
assembly_01862_gene	gnl.Prokka.assembly_1[+]1714755-1715033	111	80.2	85.28	88	92.15	99.97	41	48.94	51.97
assembly_01758_gene	gnl.Prokka.assembly_1[-]1632326-1632511	1035	1121.66	1192.71	2003	3146.3	3413.32	1060	1897.9	2015.26
assembly_01551_gene	gnl.Prokka.assembly_1[-]1457565-1457978	3296	1604.8	1706.46	1410	995.06	1079.51	1774	1427.03	1515.27
assembly_01376_gene	gnl.Prokka.assembly_1[-]1294406-1295479	500	93.85	99.79	340	92.49	100.34	333	103.26	109.64
assembly_00701_gene	gnl.Prokka.assembly_1[-]649909-651240	1652	250	265.84	1236	271.11	294.12	849	212.26	225.39
assembly_01099_gene	gnl.Prokka.assembly_1[-]1028062-1028781	1940	543.13	577.53	775	314.49	341.18	748	345.98	367.37
assembly_02061_gene	gnl.Prokka.assembly_1[-]1892252-1893001	1155	310.43	330.09	499	194.39	210.89	409	181.61	192.84
assembly_00223_gene	gnl.Prokka.assembly_1[+]202310-202876	914	324.94	345.52	289	148.92	161.56	377	221.43	235.12
assembly_00432_gene	gnl.Prokka.assembly_1[-]394745-395734	596	121.35	129.04	444	131.03	142.15	264	88.81	94.3
assembly_02317_gene	gnl.Prokka.assembly_2[+]189625-190302	255	75.82	80.62	161	69.38	75.27	80	39.3	41.73
assembly_01283_gene	gnl.Prokka.assembly_1[-]1200278-1201966	4123	492.06	523.23	2466	426.58	462.78	2395	472.23	501.43
assembly_02280_gene	gnl.Prokka.assembly_2[-]153706-155211	163	21.82	23.2	450	87.3	94.71	161	35.6	37.8
assembly_00886_gene	gnl.Prokka.assembly_1[-]823693-823869	62	70.61	75.08	19	31.36	34.02	14	26.34	27.97
assembly_01446_gene	gnl.Prokka.assembly_1[+]1362460-1363464	2548	511.06	543.43	1739	505.56	548.46	1466	485.79	515.83
assembly_00813_gene	gnl.Prokka.assembly_1[+]754801-755538	304	83.03	88.29	773	306.03	332	478	215.7	229.04
assembly_01538_gene	gnl.Prokka.assembly_1[+]1443610-1448088	7323	329.56	350.44	4499	293.47	318.38	3548	263.81	280.12
assembly_01515_gene	gnl.Prokka.assembly_1[+]1422967-1424004	4216	818.73	870.59	6368	1792.41	1944.53	5504	1765.88	1875.08
assembly_01235_gene	gnl.Prokka.assembly_1[+]1156586-1157149	531	189.78	201.8	164	84.96	92.17	183	108.06	114.74
assembly_02096_gene	gnl.Prokka.assembly_2[-]17549-19093	88	11.48	12.21	37	7	7.59	31	6.69	7.1
assembly_01676_gene	gnl.Prokka.assembly_1[+]1568271-1569464	1620	273.5	290.82	540	132.14	143.35	485	135.28	143.64
assembly_01886_gene	gnl.Prokka.assembly_1[-]1733284-1733742	268	117.69	125.15	157	99.94	108.42	180	130.59	138.67
assembly_01308_gene	gnl.Prokka.assembly_1[-]1221777-1222637	2808	657.4	699.04	1618	549.04	595.64	1500	580.18	616.06
assembly_00297_gene	gnl.Prokka.assembly_1[+]270398-271372	530	109.57	116.51	372	111.47	120.93	238	81.29	86.32
assembly_00455_gene	gnl.Prokka.assembly_1[-]418241-418423	778	856.97	911.25	767	1224.55	1328.47	654	1190.16	1263.76
assembly_00104_gene	gnl.Prokka.assembly_1[+]95586-96128	457	169.64	180.39	478	257.19	279.02	460	282.12	299.57
assembly_01985_gene	gnl.Prokka.assembly_1[+]1831477-1832175	96	27.69	29.44	48	20.07	21.77	44	20.96	22.26
assembly_00010_gene	gnl.Prokka.assembly_1[-]10322-10882	3	1.08	1.15	6	3.12	3.39	3	1.78	1.89
assembly_01712_gene	gnl.Prokka.assembly_1[+]1594612-1594725	0	0	0	0	0	0	0	0	0
assembly_01875_gene	gnl.Prokka.assembly_1[+]1721723-1723186	496	68.29	72.62	513	102.38	111.07	312	70.97	75.36
assembly_01284_gene	gnl.Prokka.assembly_1[-]1202121-1203101	961	197.46	209.97	676	201.33	218.42	603	204.7	217.36
assembly_01053_gene	gnl.Prokka.assembly_1[-]980581-982449	947	102.13	108.6	636	99.42	107.86	401	71.45	75.87
assembly_00369_gene	gnl.Prokka.assembly_1[+]337338-338222	353	80.4	85.49	304	100.36	108.88	199	74.88	79.51
assembly_01902_gene	gnl.Prokka.assembly_1[+]1744535-1745338	707	177.25	188.48	358	130.1	141.14	298	123.44	131.07
assembly_01503_gene	gnl.Prokka.assembly_1[-]1411099-1411806	771	219.51	233.42	515	212.52	230.56	394	185.33	196.79
assembly_01506_gene	gnl.Prokka.assembly_1[+]1413157-1413870	923	260.57	277.08	475	194.36	210.86	431	201.03	213.46
assembly_00075_gene	gnl.Prokka.assembly_1[-]66925-68160	920	150.04	159.54	594	140.41	152.33	436	117.48	124.74
assembly_01250_gene	gnl.Prokka.assembly_1[-]1174066-1176153	2146	207.18	220.3	1354	189.46	205.54	1065	169.87	180.37
assembly_01550_gene	gnl.Prokka.assembly_1[-]1457051-1457497	6911	3116.51	3313.92	2790	1823.6	1978.36	3073	2289.48	2431.05
assembly_02320_gene	gnl.Prokka.assembly_2[+]192461-192673	0	0	0	3	4.11	4.46	0	0	0
assembly_00968_gene	gnl.Prokka.assembly_1[-]902646-903143	759	307.22	326.68	452	265.18	287.69	337	225.36	239.3
assembly_01238_gene	gnl.Prokka.assembly_1[-]1160627-1161391	7414	1953.55	2077.3	9153	3495.7	3792.37	7771	3382.95	3592.14
assembly_00098_gene	gnl.Prokka.assembly_1[-]86791-87555	1822	480.09	510.5	880	336.09	364.61	879	382.66	406.32
assembly_01946_gene	gnl.Prokka.assembly_1[+]1794718-1796136	231	32.81	34.89	80	16.47	17.87	73	17.13	18.19
assembly_01156_gene	gnl.Prokka.assembly_1[+]1080901-1081959	5658	1076.96	1145.18	3282	905.48	982.32	3007	945.63	1004.1
assembly_01337_gene	gnl.Prokka.assembly_1[-]1257125-1258114	2389	486.43	517.24	1209	356.8	387.08	1006	338.41	359.34
assembly_01491_gene	gnl.Prokka.assembly_1[+]1400069-1400515	981	442.38	470.4	747	488.25	529.69	655	487.99	518.17
assembly_00144_gene	gnl.Prokka.assembly_1[+]129526-130215	1441	420.96	447.63	2000	846.86	918.73	1307	630.82	669.83
assembly_02278_gene	gnl.Prokka.assembly_2[+]151483-151704	241	218.83	232.69	179	235.58	255.57	124	186.02	197.52
assembly_01963_gene	gnl.Prokka.assembly_1[-]1809814-1810596	1606	413.44	439.63	717	267.54	290.25	598	254.34	270.07
assembly_01925_gene	gnl.Prokka.assembly_1[+]1770580-1771425	1902	453.18	481.89	953	329.12	357.05	848	333.82	354.46
assembly_01831_gene	gnl.Prokka.assembly_1[-]1685717-1686049	718	434.63	462.16	713	625.57	678.66	706	706.06	749.72
assembly_00816_gene	gnl.Prokka.assembly_1[-]757069-758091	1537	302.86	322.04	750	214.2	232.38	783	254.9	270.66
assembly_01189_gene	gnl.Prokka.assembly_1[-]1112342-1113679	3603	542.81	577.19	3110	679.11	736.74	2327	579.19	615
assembly_00174_gene	gnl.Prokka.assembly_1[-]152512-153306	1234	312.88	332.7	596	219.03	237.62	544	227.88	241.97
assembly_01459_gene	gnl.Prokka.assembly_1[+]1374706-1376001	818	127.23	135.29	667	150.37	163.13	506	130.03	138.07
assembly_00113_gene	gnl.Prokka.assembly_1[+]105808-106590	155	39.9	42.43	89	33.21	36.03	74	31.47	33.42
assembly_01427_gene	gnl.Prokka.assembly_1[+]1347636-1348283	579	180.11	191.52	247	111.37	120.82	292	150.07	159.35
assembly_01816_gene	gnl.Prokka.assembly_1[+]1672878-1674941	4891	477.66	507.92	4860	687.96	746.34	4601	742.37	788.28
assembly_00456_gene	gnl.Prokka.assembly_1[-]418483-419019	2825	1060.42	1127.59	1914	1041.35	1129.73	1670	1035.68	1099.72
assembly_01369_gene	gnl.Prokka.assembly_1[-]1288486-1289535	2077	398.73	423.99	1164	323.89	351.38	951	301.63	320.28
assembly_00892_gene	gnl.Prokka.assembly_1[-]828936-830468	2196	288.75	307.04	776	147.9	160.45	843	183.14	194.46
assembly_00922_gene	gnl.Prokka.assembly_1[+]856686-857852	3702	639.44	679.94	3066	767.6	832.74	2206	629.53	668.46
assembly_01995_gene	gnl.Prokka.assembly_1[-]1840249-1840413	231	282.2	300.08	200	354.14	384.2	193	389.54	413.63
assembly_00132_gene	gnl.Prokka.assembly_1[+]124566-124850	1582	1118.91	1189.79	1322	1355.24	1470.26	1177	1375.34	1460.39
assembly_00328_gene	gnl.Prokka.assembly_1[-]301353-302669	6081	930.73	989.69	6523	1447.08	1569.89	5212	1317.95	1399.45
assembly_01804_gene	gnl.Prokka.assembly_1[+]1665486-1665698	82	77.6	82.52	51	69.95	75.89	51	79.74	84.67
assembly_01540_gene	gnl.Prokka.assembly_1[+]1448326-1448877	108	39.44	41.94	60	31.76	34.45	48	28.96	30.75
assembly_00772_gene	gnl.Prokka.assembly_1[+]713659-714234	1313	459.49	488.6	580	294.19	319.16	630	364.25	386.77
assembly_01351_gene	gnl.Prokka.assembly_1[+]1269125-1269880	1572	419.15	445.7	749	289.46	314.03	636	280.17	297.49
assembly_01688_gene	gnl.Prokka.assembly_1[+]1576398-1576934	1055	396.01	421.1	368	200.22	217.21	303	187.91	199.53
assembly_01239_gene	gnl.Prokka.assembly_1[-]1161432-1163891	3307	270.98	288.14	3542	420.68	456.38	2473	334.79	355.49
assembly_00624_gene	gnl.Prokka.assembly_1[-]574846-576699	330	35.88	38.15	245	38.61	41.89	137	24.61	26.13
assembly_00422_gene	gnl.Prokka.assembly_1[+]386445-387284	1949	467.7	497.33	1200	417.38	452.8	857	339.77	360.78
assembly_02269_gene	gnl.Prokka.assembly_2[+]145041-146120	2890	539.39	573.56	3642	985.25	1068.87	2322	716.01	760.29
assembly_01398_gene	gnl.Prokka.assembly_1[+]1319208-1320371	20415	3535.33	3759.28	20303	5096.12	5528.61	18026	5157.36	5476.27
assembly_00736_gene	gnl.Prokka.assembly_1[-]680206-680832	372	119.59	127.17	116	54.05	58.64	135	71.71	76.14
assembly_00854_gene	gnl.Prokka.assembly_1[-]793285-794679	1093	157.94	167.94	525	109.96	119.29	489	116.74	123.96
assembly_01338_gene	gnl.Prokka.assembly_1[-]1258207-1258878	3550	1064.86	1132.31	3952	1718.22	1864.04	3336	1653.25	1755.48
assembly_01001_gene	gnl.Prokka.assembly_1[-]929244-930155	116	25.64	27.26	116	37.17	40.32	78	28.48	30.24
assembly_01972_gene	gnl.Prokka.assembly_1[-]1817581-1818150	433	153.12	162.82	187	95.86	103.99	174	101.66	107.95
assembly_00062_gene	gnl.Prokka.assembly_1[+]54639-55802	1960	339.42	360.92	987	247.74	268.76	929	265.79	282.23
assembly_01648_gene	gnl.Prokka.assembly_1[-]1541423-1542445	10933	2154.26	2290.72	11367	3246.4	3521.91	9340	3040.54	3228.56
assembly_00255_gene	gnl.Prokka.assembly_1[-]231399-231596	24	24.43	25.98	16	23.61	25.61	13	21.87	23.22
assembly_00713_gene	gnl.Prokka.assembly_1[-]658754-659656	227	50.67	53.88	154	49.83	54.06	172	63.44	67.36
assembly_00755_gene	gnl.Prokka.assembly_1[-]696272-697045	20	5.21	5.54	16	6.04	6.55	12	5.16	5.48
assembly_01504_gene	gnl.Prokka.assembly_1[-]1411819-1412448	841	269.08	286.13	307	142.38	154.46	311	164.4	174.57
assembly_00587_gene	gnl.Prokka.assembly_1[+]533596-534024	82	38.53	40.97	44	29.97	32.51	52	40.36	42.86
assembly_01623_gene	gnl.Prokka.assembly_1[-]1518445-1519077	292	92.99	98.88	253	116.78	126.69	202	106.28	112.85
assembly_02390_gene	gnl.Prokka.assembly_2[-]240074-240592	1	0.39	0.41	0	0	0	0	0	0
assembly_02023_gene	gnl.Prokka.assembly_1[-]1860070-1860702	4265	1358.16	1444.19	3425	1580.84	1715	2625	1381.04	1466.44
assembly_00367_gene	gnl.Prokka.assembly_1[+]336241-336690	148	66.29	70.49	64	41.55	45.08	68	50.33	53.44
assembly_00251_gene	gnl.Prokka.assembly_1[+]227399-229045	3472	424.93	451.85	1283	227.59	246.91	1281	259.02	275.04
assembly_00836_gene	gnl.Prokka.assembly_1[+]774942-775454	232	91.16	96.93	81	46.13	50.05	89	57.78	61.35
assembly_02314_gene	gnl.Prokka.assembly_2[+]186308-187570	202	32.24	34.28	96	22.21	24.09	27	7.12	7.56
assembly_01085_gene	gnl.Prokka.assembly_1[+]1016072-1017856	76	8.59	9.13	23	3.76	4.08	22	4.11	4.36
assembly_00706_gene	gnl.Prokka.assembly_1[+]654146-654631	172	71.34	75.86	90	54.11	58.7	87	59.61	63.3
assembly_01182_gene	gnl.Prokka.assembly_1[+]1107501-1108037	44	16.51	17.56	24	13.06	14.17	10	6.21	6.59
assembly_00227_gene	gnl.Prokka.assembly_1[+]204910-205392	223	93.06	98.96	146	88.31	95.81	119	82.05	87.12
assembly_02092_gene	gnl.Prokka.assembly_2[+]13857-14417	36	12.93	13.75	41	21.35	23.16	35	20.78	22.06
assembly_01796_gene	gnl.Prokka.assembly_1[+]1655725-1656114	667	344.74	366.58	299	223.99	243	293	250.2	265.67
assembly_00637_gene	gnl.Prokka.assembly_1[-]587870-589315	941	131.18	139.49	424	85.67	92.94	346	79.68	84.61
assembly_01321_gene	gnl.Prokka.assembly_1[-]1238057-1239028	1115	231.23	245.88	515	154.8	167.94	439	150.41	159.71
assembly_00059_gene	gnl.Prokka.assembly_1[+]52273-52851	1800	626.65	666.35	1124	567.18	615.31	1040	598.18	635.17
assembly_00552_gene	gnl.Prokka.assembly_1[+]500194-501075	568	129.81	138.03	323	107	116.08	192	72.5	76.98
assembly_02304_gene	gnl.Prokka.assembly_2[+]178564-180057	550	74.21	78.91	388	75.88	82.32	231	51.5	54.68
assembly_01406_gene	gnl.Prokka.assembly_1[+]1327861-1328904	3024	583.87	620.85	1462	409.15	443.87	1450	462.54	491.14
assembly_00594_gene	gnl.Prokka.assembly_1[+]538314-539975	1108	134.38	142.89	661	116.2	126.06	563	112.81	119.79
assembly_00143_gene	gnl.Prokka.assembly_1[+]129090-129533	915	415.41	441.72	1186	780.43	846.66	742	556.55	590.96
assembly_00609_gene	gnl.Prokka.assembly_1[+]560442-561500	267	50.82	54.04	206	56.84	61.66	147	46.23	49.09
assembly_01790_gene	gnl.Prokka.assembly_1[-]1650987-1651451	261	113.14	120.31	172	108.07	117.24	103	73.77	78.33
assembly_01766_gene	gnl.Prokka.assembly_1[-]1635421-1635762	639	376.62	400.48	1499	1280.58	1389.26	649	631.97	671.05
assembly_01659_gene	gnl.Prokka.assembly_1[-]1550539-1551636	14	2.57	2.73	3	0.8	0.87	7	2.12	2.25
assembly_00009_gene	gnl.Prokka.assembly_1[-]9601-10263	2302	699.89	744.22	1867	822.74	892.56	1632	819.76	870.45
assembly_00378_gene	gnl.Prokka.assembly_1[-]344993-345445	500	222.49	236.58	312	201.23	218.31	227	166.88	177.2
assembly_01108_gene	gnl.Prokka.assembly_1[-]1034748-1036226	3139	427.82	454.92	2441	482.21	523.13	1904	428.73	455.24
assembly_01431_gene	gnl.Prokka.assembly_1[-]1350653-1351660	75	15	15.95	76	22.03	23.9	52	17.18	18.24
assembly_00638_gene	gnl.Prokka.assembly_1[-]589299-590672	1616	237.07	252.09	806	171.39	185.93	707	171.36	181.96
assembly_01657_gene	gnl.Prokka.assembly_1[-]1548886-1549809	2604	568.08	604.06	460	145.46	157.8	773	278.6	295.83
assembly_01421_gene	gnl.Prokka.assembly_1[+]1343027-1343476	302	135.28	143.85	216	140.24	152.14	173	128.03	135.95
assembly_00465_gene	gnl.Prokka.assembly_1[+]425353-426396	2539	490.23	521.28	1284	359.33	389.83	1133	361.42	383.77
assembly_02127_gene	gnl.Prokka.assembly_2[-]47283-48062	20	5.17	5.5	23	8.62	9.35	16	6.83	7.25
assembly_01270_gene	gnl.Prokka.assembly_1[-]1189997-1190680	1258	370.73	394.21	560	239.2	259.5	493	240.04	254.88
assembly_01097_gene	gnl.Prokka.assembly_1[+]1026942-1027520	377	131.25	139.56	194	97.89	106.2	216	124.24	131.92
assembly_01025_gene	gnl.Prokka.assembly_1[+]951799-952971	2072	356.07	378.62	540	134.5	145.92	621	176.31	187.21
assembly_00190_gene	gnl.Prokka.assembly_1[-]166572-167666	106	19.51	20.75	53	14.14	15.34	52	15.81	16.79
assembly_00233_gene	gnl.Prokka.assembly_1[-]211056-211757	234	67.19	71.45	106	44.12	47.86	80	37.95	40.3
assembly_00250_gene	gnl.Prokka.assembly_1[+]226234-227421	1713	290.65	309.06	669	164.53	178.49	678	190.06	201.81
assembly_01078_gene	gnl.Prokka.assembly_1[+]1011963-1012229	180	135.89	144.5	84	91.92	99.72	74	92.3	98.01
assembly_01958_gene	gnl.Prokka.assembly_1[-]1805881-1806603	503	140.24	149.12	411	166.08	180.18	285	131.27	139.39
assembly_00161_gene	gnl.Prokka.assembly_1[-]142813-143016	880	869.53	924.61	699	1001.1	1086.06	774	1263.55	1341.68
assembly_01462_gene	gnl.Prokka.assembly_1[+]1378221-1379099	1154	264.64	281.4	1024	340.36	369.25	726	275.06	292.07
assembly_01771_gene	gnl.Prokka.assembly_1[-]1637853-1638473	2205	715.73	761.07	3175	1493.77	1620.54	1483	795.3	844.48
assembly_01824_gene	gnl.Prokka.assembly_1[-]1679425-1680429	1433	287.41	305.62	664	193.04	209.42	627	207.77	220.62
assembly_00129_gene	gnl.Prokka.assembly_1[-]121619-122500	2775	634.21	674.38	1801	596.59	647.22	1725	651.33	691.61
assembly_01595_gene	gnl.Prokka.assembly_1[+]1498185-1499408	7398	1218.33	1295.51	4107	980.33	1063.53	3614	983.31	1044.11
assembly_00856_gene	gnl.Prokka.assembly_1[-]795624-796781	4972	865.48	920.3	3109	784.41	850.98	2944	846.67	899.02
assembly_00151_gene	gnl.Prokka.assembly_1[+]133681-134505	23	5.62	5.98	8	2.83	3.07	9	3.64	3.86
assembly_02163_gene	gnl.Prokka.assembly_2[+]72678-73634	341	71.82	76.37	107	32.67	35.44	132	45.94	48.78
assembly_01248_gene	gnl.Prokka.assembly_1[-]1171787-1173334	521	67.84	72.14	271	51.15	55.49	225	48.41	51.4
assembly_01707_gene	gnl.Prokka.assembly_1[+]1589116-1590108	985	199.95	212.62	2404	707.32	767.35	781	261.92	278.12
assembly_00956_gene	gnl.Prokka.assembly_1[+]885863-886684	1148	281.52	299.35	758	269.42	292.28	640	259.3	275.33
assembly_02048_gene	gnl.Prokka.assembly_1[-]1879594-1880880	42	6.57	6.99	19	4.31	4.68	3	0.77	0.82
assembly_00125_gene	gnl.Prokka.assembly_1[-]117357-118562	587	98.11	104.33	354	85.76	93.04	275	75.93	80.63
assembly_01188_gene	gnl.Prokka.assembly_1[-]1111993-1112331	841	500.07	531.75	719	619.67	672.26	504	495.12	525.74
assembly_00302_gene	gnl.Prokka.assembly_1[-]276366-276731	253	139.34	148.17	102	81.42	88.33	124	112.83	119.81
assembly_00377_gene	gnl.Prokka.assembly_1[+]343822-344973	1987	347.68	369.7	841	213.29	231.39	582	168.25	178.65
assembly_01689_gene	gnl.Prokka.assembly_1[-]1576931-1577167	24	20.42	21.71	39	48.08	52.16	20	28.1	29.84
assembly_00298_gene	gnl.Prokka.assembly_1[-]271350-271898	892	327.51	348.26	587	312.39	338.9	522	316.65	336.23
assembly_00277_gene	gnl.Prokka.assembly_1[-]249081-249320	525	440.94	468.87	335	407.82	442.43	329	456.53	484.76
assembly_01288_gene	gnl.Prokka.assembly_1[+]1205053-1206717	70	8.47	9.01	25	4.39	4.76	16	3.2	3.4
assembly_00695_gene	gnl.Prokka.assembly_1[-]643207-644934	855	99.73	106.05	613	103.64	112.44	453	87.3	92.7
assembly_00871_gene	gnl.Prokka.assembly_1[-]809074-809847	1353	352.36	374.68	933	352.19	382.08	759	326.58	346.77
assembly_02202_gene	gnl.Prokka.assembly_2[+]100176-100967	413	105.11	111.77	133	49.07	53.23	134	56.35	59.83
assembly_01951_gene	gnl.Prokka.assembly_1[-]1800081-1800743	1784	542.39	576.75	1102	485.63	526.84	1096	550.53	584.57
assembly_02173_gene	gnl.Prokka.assembly_2[-]80815-81003	10	10.66	11.34	10	15.46	16.77	7	12.34	13.1
assembly_02335_gene	gnl.Prokka.assembly_2[+]206853-207413	8	2.88	3.06	6	3.12	3.39	5	2.97	3.15
assembly_02362_gene	gnl.Prokka.assembly_2[+]228733-229107	136	73.1	77.73	125	97.39	105.65	130	115.45	122.59
assembly_00967_gene	gnl.Prokka.assembly_1[-]899623-902649	1303	86.77	92.27	765	73.83	80.1	558	61.39	65.19
assembly_01409_gene	gnl.Prokka.assembly_1[-]1331844-1333580	1860	215.85	229.52	700	117.74	127.73	721	138.23	146.78
assembly_00474_gene	gnl.Prokka.assembly_1[-]432373-432813	1248	570.44	606.57	775	513.45	557.02	656	495.39	526.02
assembly_00883_gene	gnl.Prokka.assembly_1[-]818990-820864	428	46.02	48.93	194	30.23	32.8	178	31.62	33.57
assembly_00247_gene	gnl.Prokka.assembly_1[+]224259-224651	556	285.18	303.24	293	217.82	236.31	214	181.35	192.56
assembly_00691_gene	gnl.Prokka.assembly_1[-]638188-639294	692	126.01	133.99	313	82.61	89.62	322	96.87	102.86
assembly_01039_gene	gnl.Prokka.assembly_1[-]965017-966063	662	127.45	135.52	304	84.83	92.03	215	68.39	72.62
assembly_01782_gene	gnl.Prokka.assembly_1[-]1645809-1647164	2894	430.2	457.45	1151	247.99	269.04	897	220.3	233.92
assembly_00832_gene	gnl.Prokka.assembly_1[-]770582-771673	510	94.14	100.1	204	54.58	59.21	176	53.67	56.99
assembly_00941_gene	gnl.Prokka.assembly_1[-]872160-873269	695	126.21	134.21	299	78.7	85.38	239	71.71	76.14
assembly_00348_gene	gnl.Prokka.assembly_1[-]319970-321088	1646	296.51	315.29	679	177.28	192.33	842	250.58	266.08
assembly_00266_gene	gnl.Prokka.assembly_1[+]240596-241543	1413	300.45	319.48	796	245.32	266.14	700	245.9	261.11
assembly_02322_gene	gnl.Prokka.assembly_2[+]193184-194752	2163	277.89	295.49	1651	307.44	333.53	886	188.06	199.69
assembly_01808_gene	gnl.Prokka.assembly_1[+]1668010-1668762	209	55.95	59.49	90	34.92	37.88	92	40.68	43.2
assembly_02399_gene	gnl.Prokka.assembly_2[+]244619-245344	623	172.97	183.93	396	159.37	172.89	430	197.24	209.44
assembly_01733_gene	gnl.Prokka.assembly_1[-]1617206-1617829	1728	558.2	593.56	987	462.13	501.35	815	434.96	461.86
assembly_00937_gene	gnl.Prokka.assembly_1[+]868247-869839	1976	250.04	265.88	860	157.73	171.12	672	140.48	149.17
assembly_00472_gene	gnl.Prokka.assembly_1[-]430900-431325	700	331.23	352.21	410	281.2	305.06	264	206.39	219.15
assembly_02187_gene	gnl.Prokka.assembly_2[+]91472-93058	26	3.3	3.51	8	1.47	1.6	10	2.1	2.23
assembly_01299_gene	gnl.Prokka.assembly_1[+]1214419-1215024	1979	658.27	699.97	865	417.04	452.43	1031	566.58	601.62
assembly_02084_gene	gnl.Prokka.assembly_2[-]5947-6912	99	20.66	21.97	22	6.66	7.22	41	14.14	15.01
assembly_01554_gene	gnl.Prokka.assembly_1[-]1458987-1459673	34345	10077.2	10715.6	16287	6926.54	7514.37	19135	9275.82	9849.4
assembly_00168_gene	gnl.Prokka.assembly_1[-]147402-148448	885	170.39	181.18	762	212.63	230.68	776	246.83	262.09
assembly_00565_gene	gnl.Prokka.assembly_1[-]513492-514376	404	92.02	97.85	213	70.32	76.29	202	76.01	80.71
assembly_00091_gene	gnl.Prokka.assembly_1[-]82331-83401	6916	1301.67	1384.12	3829	1044.54	1133.19	3668	1140.56	1211.09
assembly_00039_gene	gnl.Prokka.assembly_1[-]38691-39185	668	272.02	289.25	341	201.27	218.35	270	181.65	192.88
assembly_00464_gene	gnl.Prokka.assembly_1[-]424945-425154	35	33.59	35.72	36	50.09	54.34	32	50.75	53.89
assembly_01632_gene	gnl.Prokka.assembly_1[+]1526582-1526869	2048	1433.41	1524.21	1223	1240.7	1345.99	1156	1336.74	1419.4
assembly_00721_gene	gnl.Prokka.assembly_1[-]668106-668828	74	20.63	21.94	167	67.48	73.21	102	46.98	49.89
assembly_01445_gene	gnl.Prokka.assembly_1[+]1361914-1362405	686	281.06	298.86	296	175.77	190.69	233	157.72	167.47
assembly_01397_gene	gnl.Prokka.assembly_1[+]1317730-1319070	23604	3548.06	3772.81	19050	4150.48	4502.72	23303	5787.14	6144.99
assembly_00859_gene	gnl.Prokka.assembly_1[-]798477-799010	66	24.91	26.49	45	24.62	26.71	35	21.83	23.18
assembly_01924_gene	gnl.Prokka.assembly_1[+]1770079-1770576	1887	763.8	812.18	1141	669.4	726.21	894	597.84	634.81
assembly_00433_gene	gnl.Prokka.assembly_1[-]395731-398205	1319	107.43	114.23	1035	122.18	132.55	729	98.09	104.16
assembly_01116_gene	gnl.Prokka.assembly_1[-]1040183-1041484	3164	489.85	520.88	1763	395.62	429.19	1674	428.18	454.66
assembly_01584_gene	gnl.Prokka.assembly_1[+]1487367-1488677	1065	163.75	174.12	878	195.67	212.28	674	171.21	181.8
assembly_01781_gene	gnl.Prokka.assembly_1[+]1645390-1645788	269	135.9	144.51	162	118.62	128.69	141	117.68	124.96
assembly_01505_gene	gnl.Prokka.assembly_1[+]1412497-1413147	1329	411.5	437.57	822	368.91	400.22	760	388.79	412.83
assembly_00015_gene	gnl.Prokka.assembly_1[-]15304-16305	1526	306.98	326.43	927	270.3	293.24	749	248.94	264.33
assembly_00070_gene	gnl.Prokka.assembly_1[-]59530-60249	8	2.24	2.38	8	3.24	3.52	5	2.32	2.46
assembly_01489_gene	gnl.Prokka.assembly_1[-]1399026-1399478	181	80.54	85.64	237	152.86	165.83	165	121.3	128.8
assembly_00690_gene	gnl.Prokka.assembly_1[-]637125-638219	185	34.05	36.21	92	24.55	26.63	73	22.2	23.57
assembly_01007_gene	gnl.Prokka.assembly_1[-]934227-935690	495	68.15	72.47	174	34.72	37.67	150	34.12	36.23
assembly_01480_gene	gnl.Prokka.assembly_1[-]1391591-1392877	322	50.44	53.63	649	147.34	159.84	479	123.95	131.61
assembly_00332_gene	gnl.Prokka.assembly_1[-]305075-305620	1250	461.48	490.71	1779	951.95	1032.74	1698	1035.68	1099.72
assembly_00216_gene	gnl.Prokka.assembly_1[-]196938-197411	355	150.97	160.53	145	89.38	96.96	111	77.99	82.81
assembly_01907_gene	gnl.Prokka.assembly_1[-]1748813-1749052	348	292.29	310.8	212	258.08	279.98	203	281.68	299.1
assembly_00903_gene	gnl.Prokka.assembly_1[+]841394-841999	1299	432.09	459.46	689	332.19	360.38	554	304.45	323.28
assembly_02203_gene	gnl.Prokka.assembly_2[+]100934-103387	904	74.26	78.96	400	47.62	51.66	283	38.41	40.78
assembly_01474_gene	gnl.Prokka.assembly_1[-]1386980-1387666	2423	710.94	755.97	2401	1021.1	1107.76	1735	841.05	893.06
assembly_00783_gene	gnl.Prokka.assembly_1[-]723946-724563	966	315.08	335.04	847	400.43	434.41	764	411.7	437.16
assembly_01692_gene	gnl.Prokka.assembly_1[-]1578411-1578938	1119	427.2	454.26	871	481.97	522.87	717	452.24	480.2
assembly_01362_gene	gnl.Prokka.assembly_1[+]1281583-1282881	7070	1097.09	1166.59	4198	944.2	1024.33	3730	956.27	1015.4
assembly_01806_gene	gnl.Prokka.assembly_1[+]1666356-1667477	243	43.65	46.42	149	38.8	42.09	158	46.9	49.8
assembly_01199_gene	gnl.Prokka.assembly_1[+]1120333-1120437	230	441.54	469.51	401	1115.8	1210.5	535	1696.85	1801.78
assembly_01249_gene	gnl.Prokka.assembly_1[-]1173321-1174055	534	146.45	155.73	251	99.77	108.24	210	95.15	101.03
assembly_01329_gene	gnl.Prokka.assembly_1[+]1246546-1248318	4605	523.55	556.71	2154	354.96	385.08	1981	372.1	395.11
assembly_01878_gene	gnl.Prokka.assembly_1[+]1725914-1727749	1911	209.81	223.1	1257	200.03	217.01	979	177.58	188.56
assembly_02000_gene	gnl.Prokka.assembly_1[+]1842768-1842914	287	393.55	418.48	150	298.13	323.43	144	326.23	346.4
assembly_01835_gene	gnl.Prokka.assembly_1[-]1688017-1689015	189	38.13	40.55	113	33.05	35.85	98	32.67	34.69
assembly_01358_gene	gnl.Prokka.assembly_1[+]1279367-1279735	134	73.2	77.84	42	33.26	36.08	46	41.51	44.08
assembly_01600_gene	gnl.Prokka.assembly_1[-]1503312-1503800	365	150.46	159.99	232	138.62	150.38	220	149.83	159.09
assembly_00007_gene	gnl.Prokka.assembly_1[-]7057-8904	10361	1130.14	1201.73	7100	1122.51	1217.77	4671	841.76	893.81
assembly_00815_gene	gnl.Prokka.assembly_1[+]755921-757087	2067	357.02	379.64	819	205.04	222.44	734	209.46	222.41
assembly_01857_gene	gnl.Prokka.assembly_1[-]1709888-1711159	991	157.04	166.99	547	125.64	136.3	556	145.57	154.57
assembly_00754_gene	gnl.Prokka.assembly_1[-]695548-696279	17	4.68	4.98	10	3.99	4.33	6	2.73	2.9
assembly_00687_gene	gnl.Prokka.assembly_1[-]633091-634719	39	4.82	5.13	39	7	7.59	25	5.11	5.43
assembly_01146_gene	gnl.Prokka.assembly_1[+]1070791-1072107	1485	227.28	241.68	645	143.09	155.23	570	144.14	153.05
assembly_00585_gene	gnl.Prokka.assembly_1[-]532567-533274	20	5.69	6.05	13	5.36	5.82	15	7.05	7.49
assembly_00894_gene	gnl.Prokka.assembly_1[-]831292-832236	741	158.06	168.07	1067	329.88	357.88	744	262.2	278.41
assembly_00319_gene	gnl.Prokka.assembly_1[-]290244-292022	6370	721.77	767.49	5002	821.48	891.2	4462	835.28	886.93
assembly_01342_gene	gnl.Prokka.assembly_1[-]1262402-1263373	3905	809.82	861.12	3991	1199.63	1301.44	3152	1079.94	1146.72
assembly_00989_gene	gnl.Prokka.assembly_1[+]917997-919487	1743	235.64	250.57	1203	235.73	255.74	1007	224.92	238.83
assembly_00477_gene	gnl.Prokka.assembly_1[+]435022-436365	176	26.4	28.07	180	39.13	42.45	99	24.53	26.05
assembly_00777_gene	gnl.Prokka.assembly_1[-]719173-720438	719	114.48	121.73	379	87.47	94.89	349	91.8	97.48
assembly_02178_gene	gnl.Prokka.assembly_2[+]84791-85078	82	57.39	61.03	60	60.86	66.03	39	45.1	47.89
assembly_01400_gene	gnl.Prokka.assembly_1[+]1321411-1322742	3266	494.25	525.56	5002	1097.17	1190.28	3577	894.33	949.63
assembly_01633_gene	gnl.Prokka.assembly_1[+]1526869-1527255	1213	631.81	671.83	714	539.03	584.78	678	583.44	619.52
assembly_00782_gene	gnl.Prokka.assembly_1[-]722918-723787	599	138.79	147.58	344	115.53	125.33	307	117.51	124.78
assembly_00346_gene	gnl.Prokka.assembly_1[+]317291-319765	2210	179.99	191.39	1591	187.81	203.75	1030	138.59	147.16
assembly_01103_gene	gnl.Prokka.assembly_1[-]1029851-1031155	1239	191.38	203.5	1406	314.78	341.49	902	230.19	244.42
assembly_00615_gene	gnl.Prokka.assembly_1[-]566021-567010	2605	530.4	564	1167	344.4	373.63	1125	378.44	401.84
assembly_00824_gene	gnl.Prokka.assembly_1[+]763842-765035	3803	642.03	682.7	1400	342.58	371.65	1351	376.82	400.12
assembly_01981_gene	gnl.Prokka.assembly_1[-]1824047-1826047	2853	287.4	305.61	2072	302.53	328.21	1897	315.72	335.24
assembly_00423_gene	gnl.Prokka.assembly_1[+]387295-388656	2148	317.9	338.04	1224	262.57	284.85	1024	250.38	265.86
assembly_01237_gene	gnl.Prokka.assembly_1[-]1159776-1160561	2423	621.39	660.75	2395	890.26	965.81	1649	698.68	741.88
assembly_00705_gene	gnl.Prokka.assembly_1[+]653856-654122	128	96.64	102.76	75	82.07	89.03	49	61.12	64.9
assembly_02336_gene	gnl.Prokka.assembly_2[-]208714-209661	54	11.48	12.21	47	14.48	15.71	31	10.89	11.56
assembly_02041_gene	gnl.Prokka.assembly_1[-]1873183-1873911	537	148.48	157.89	470	188.36	204.35	456	208.32	221.2
assembly_00411_gene	gnl.Prokka.assembly_1[+]375820-376149	106	64.75	68.85	62	54.89	59.55	62	62.57	66.44
assembly_00202_gene	gnl.Prokka.assembly_1[+]180223-180579	76	42.91	45.63	54	44.19	47.94	45	41.97	44.57
assembly_01411_gene	gnl.Prokka.assembly_1[-]1334847-1335662	3320	820.13	872.08	1715	614.06	666.17	1707	696.66	739.74
assembly_00487_gene	gnl.Prokka.assembly_1[+]445873-446706	560	135.35	143.92	335	117.36	127.32	301	120.2	127.63
assembly_00150_gene	gnl.Prokka.assembly_1[-]132321-133613	47	7.33	7.79	6	1.36	1.47	6	1.54	1.64
assembly_00634_gene	gnl.Prokka.assembly_1[-]584191-585234	595	114.88	122.16	251	70.24	76.2	285	90.91	96.53
assembly_01656_gene	gnl.Prokka.assembly_1[-]1547320-1548870	5275	685.56	728.99	756	142.41	154.5	1119	240.27	255.13
assembly_01341_gene	gnl.Prokka.assembly_1[-]1262085-1262399	1307	836.37	889.35	1716	1591.61	1726.69	1326	1401.89	1488.58
assembly_00222_gene	gnl.Prokka.assembly_1[+]201505-202332	1115	271.45	288.64	400	141.14	153.12	448	180.19	191.33
assembly_01159_gene	gnl.Prokka.assembly_1[+]1083113-1084246	2159	383.77	408.08	1303	335.71	364.2	1249	366.8	389.48
assembly_01836_gene	gnl.Prokka.assembly_1[-]1689024-1690046	57	11.23	11.94	37	10.56	11.46	43	13.99	14.86
assembly_01145_gene	gnl.Prokka.assembly_1[+]1069488-1070807	3115	475.69	505.82	1476	326.69	354.42	1323	333.78	354.42
assembly_01379_gene	gnl.Prokka.assembly_1[+]1296961-1298061	2376	435	462.56	1211	321.36	348.63	1006	304.29	323.11
assembly_00598_gene	gnl.Prokka.assembly_1[+]542815-544005	3315	561.06	596.6	1747	428.56	464.93	1810	506.11	537.41
assembly_02331_gene	gnl.Prokka.assembly_2[+]202428-202865	2961	1362.69	1449.01	453	302.18	327.82	770	585.46	621.66
assembly_01054_gene	gnl.Prokka.assembly_1[-]982446-982862	139	67.19	71.45	107	74.97	81.33	81	64.69	68.69
assembly_01639_gene	gnl.Prokka.assembly_1[-]1531743-1532042	465	312.44	332.23	442	430.46	466.99	335	371.88	394.88
assembly_01728_gene	gnl.Prokka.assembly_1[-]1611882-1612169	739	517.24	550	362	367.23	398.4	294	339.97	360.99
assembly_00850_gene	gnl.Prokka.assembly_1[-]789883-790212	156	95.29	101.33	131	115.98	125.82	81	81.75	86.8
assembly_00218_gene	gnl.Prokka.assembly_1[-]197822-198874	1819	348.2	370.26	991	274.96	298.3	962	304.25	323.06
assembly_01317_gene	gnl.Prokka.assembly_1[-]1228380-1230326	1926	199.4	212.03	1132	169.86	184.28	1260	215.52	228.85
assembly_01374_gene	gnl.Prokka.assembly_1[-]1292810-1294132	3962	603.65	641.89	2916	643.96	698.61	2075	522.32	554.62
assembly_01717_gene	gnl.Prokka.assembly_1[+]1599465-1600397	1635	353.24	375.62	1075	336.63	365.2	942	336.24	357.03
assembly_00792_gene	gnl.Prokka.assembly_1[-]731585-734293	16305	1213.24	1290.09	14786	1594.68	1730.02	13907	1709.64	1815.36
assembly_02282_gene	gnl.Prokka.assembly_2[-]156800-158857	250	24.49	26.04	172	24.42	26.49	154	24.92	26.46
assembly_00111_gene	gnl.Prokka.assembly_1[-]102083-103330	1842	297.51	316.36	1307	305.98	331.95	1167	311.41	330.67
assembly_00340_gene	gnl.Prokka.assembly_1[-]308914-309048	1	1.5	1.59	3	6.49	7.04	0	0	0
assembly_02130_gene	gnl.Prokka.assembly_2[+]51068-53641	756	59.2	62.95	380	43.13	46.79	319	41.27	43.82
assembly_01123_gene	gnl.Prokka.assembly_1[-]1048356-1049633	78	12.3	13.08	72	16.46	17.86	64	16.68	17.71
assembly_00738_gene	gnl.Prokka.assembly_1[-]682051-682428	289	154.12	163.88	86	66.47	72.11	74	65.2	69.23
assembly_01837_gene	gnl.Prokka.assembly_1[-]1690024-1691169	81	14.25	15.15	45	11.48	12.45	39	11.33	12.03
assembly_00664_gene	gnl.Prokka.assembly_1[-]617023-617334	79	51.04	54.27	23	21.54	23.37	30	32.02	34
assembly_00841_gene	gnl.Prokka.assembly_1[-]780940-781686	2482	669.75	712.18	1611	630.1	683.57	1645	733.37	778.72
assembly_01028_gene	gnl.Prokka.assembly_1[+]955703-956434	231	63.61	67.64	54	21.55	23.38	46	20.93	22.22
assembly_01772_gene	gnl.Prokka.assembly_1[-]1638470-1638787	1430	906.45	963.87	2048	1881.63	2041.32	986	1032.6	1096.45
assembly_02050_gene	gnl.Prokka.assembly_1[+]1882000-1884357	2930	250.47	266.34	2127	263.54	285.91	1816	256.48	272.34
assembly_02029_gene	gnl.Prokka.assembly_1[+]1865071-1866138	3205	604.91	643.23	2053	561.63	609.29	2301	717.5	761.87
assembly_01502_gene	gnl.Prokka.assembly_1[-]1410280-1411095	3346	826.55	878.91	2193	785.2	851.84	1908	778.7	826.85
assembly_00165_gene	gnl.Prokka.assembly_1[+]145647-146039	59	30.26	32.18	53	39.41	42.75	23	19.49	20.7
assembly_00843_gene	gnl.Prokka.assembly_1[-]782701-784761	4343	424.76	451.67	1311	185.85	201.62	1191	192.45	204.35
assembly_00097_gene	gnl.Prokka.assembly_1[-]86219-86794	803	281.01	298.81	282	143.04	155.18	299	172.87	183.56
assembly_00362_gene	gnl.Prokka.assembly_1[-]331235-331906	1863	558.83	594.23	786	341.73	370.73	699	346.41	367.83
assembly_01965_gene	gnl.Prokka.assembly_1[-]1812607-1813218	417	137.35	146.05	353	168.52	182.82	297	161.62	171.61
assembly_02098_gene	gnl.Prokka.assembly_2[-]19608-20447	78	18.71	19.9	21	7.3	7.92	32	12.69	13.47
assembly_01590_gene	gnl.Prokka.assembly_1[+]1491762-1493939	9129	844.89	898.41	5403	724.79	786.3	4649	710.85	754.81
assembly_00918_gene	gnl.Prokka.assembly_1[-]854725-855411	518	151.98	161.61	364	154.8	167.94	328	159	168.83
assembly_01635_gene	gnl.Prokka.assembly_1[+]1527771-1529432	2355	285.63	303.72	1263	222.03	240.87	1186	237.64	252.34
assembly_02056_gene	gnl.Prokka.assembly_1[+]1887791-1888417	757	243.36	258.78	459	213.89	232.04	343	182.18	193.45
assembly_00571_gene	gnl.Prokka.assembly_1[-]517872-518999	556	99.36	105.65	332	85.99	93.29	271	80.01	84.96
assembly_00035_gene	gnl.Prokka.assembly_1[+]34970-35875	1415	314.82	334.76	876	282.5	306.47	889	326.78	346.99
assembly_00927_gene	gnl.Prokka.assembly_1[-]860893-861996	843	153.92	163.67	560	148.2	160.78	428	129.11	137.09
assembly_02024_gene	gnl.Prokka.assembly_1[-]1860711-1861193	6307	2632.15	2798.88	5163	3123.11	3388.16	3853	2656.63	2820.91
assembly_01062_gene	gnl.Prokka.assembly_1[-]992010-993437	6514	919.5	977.75	3072	628.53	681.87	3056	712.7	756.77
assembly_01834_gene	gnl.Prokka.assembly_1[-]1687007-1688020	454	90.25	95.97	534	153.86	166.92	377	123.81	131.47
assembly_00329_gene	gnl.Prokka.assembly_1[-]302666-303211	2501	923.32	981.81	3184	1703.78	1848.37	2671	1629.15	1729.89
assembly_02040_gene	gnl.Prokka.assembly_1[+]1872693-1873193	123	49.49	52.62	80	46.65	50.61	58	38.56	40.94
assembly_00661_gene	gnl.Prokka.assembly_1[+]610680-611879	1825	306.56	325.98	1560	379.82	412.05	1030	285.84	303.52
assembly_01726_gene	gnl.Prokka.assembly_1[-]1609841-1611553	4756	559.65	595.1	2219	378.47	410.59	1963	381.63	405.23
assembly_01161_gene	gnl.Prokka.assembly_1[-]1084774-1085589	1946	480.71	511.16	1328	475.49	515.84	1090	444.85	472.36
assembly_00533_gene	gnl.Prokka.assembly_1[-]482555-482815	160	123.57	131.4	75	83.95	91.08	89	113.56	120.58
assembly_00942_gene	gnl.Prokka.assembly_1[-]873250-874032	1437	369.94	393.37	777	289.92	314.53	726	308.79	327.88
assembly_01136_gene	gnl.Prokka.assembly_1[+]1063969-1065204	793	129.33	137.52	433	102.35	111.04	369	99.42	105.57
assembly_01296_gene	gnl.Prokka.assembly_1[-]1211649-1212662	2150	427.4	454.47	948	273.15	296.33	1204	395.43	419.88
assembly_00461_gene	gnl.Prokka.assembly_1[+]422943-423878	550	118.45	125.95	357	111.43	120.89	269	95.71	101.63
assembly_00582_gene	gnl.Prokka.assembly_1[+]531206-531403	75	76.35	81.19	123	181.5	196.9	108	181.65	192.88
assembly_02361_gene	gnl.Prokka.assembly_2[+]228471-228752	125	89.35	95.01	144	149.19	161.85	110	129.91	137.94
assembly_01447_gene	gnl.Prokka.assembly_1[+]1363599-1364732	4876	866.73	921.63	2543	655.19	710.79	2225	653.42	693.83
assembly_00368_gene	gnl.Prokka.assembly_1[-]336677-337309	183	58.28	61.97	155	71.54	77.61	100	52.61	55.86
assembly_01524_gene	gnl.Prokka.assembly_1[-]1432301-1432696	2247	1143.78	1216.23	1721	1269.75	1377.51	1510	1269.88	1348.4
assembly_02226_gene	gnl.Prokka.assembly_2[-]111051-112271	76	12.55	13.34	39	9.33	10.12	29	7.91	8.4
assembly_01233_gene	gnl.Prokka.assembly_1[+]1154300-1154617	396	251.02	266.92	171	157.11	170.44	165	172.8	183.48
assembly_00715_gene	gnl.Prokka.assembly_1[-]660631-661830	315	52.91	56.26	176	42.85	46.49	161	44.68	47.44
assembly_01468_gene	gnl.Prokka.assembly_1[-]1382606-1383586	2034	417.95	444.42	1078	321.05	348.3	1010	342.87	364.07
assembly_01326_gene	gnl.Prokka.assembly_1[+]1241368-1243554	1597	147.2	156.52	872	116.49	126.38	863	131.41	139.54
assembly_02033_gene	gnl.Prokka.assembly_1[+]1868974-1869768	56	14.2	15.1	38	13.96	15.15	43	18.02	19.13
assembly_01948_gene	gnl.Prokka.assembly_1[+]1797645-1797890	101	82.76	88	31	36.82	39.94	46	62.27	66.12
assembly_00877_gene	gnl.Prokka.assembly_1[-]813505-814539	223	43.43	46.18	261	73.68	79.93	214	68.86	73.12
assembly_01694_gene	gnl.Prokka.assembly_1[+]1579507-1579935	216	101.49	107.92	103	70.15	76.1	101	78.4	83.25
assembly_02010_gene	gnl.Prokka.assembly_1[+]1849414-1850010	2532	854.92	909.07	1443	706.2	766.13	1352	754.19	800.83
assembly_02015_gene	gnl.Prokka.assembly_1[-]1853890-1854453	557	199.07	211.68	377	195.3	211.87	351	207.25	220.07
assembly_02025_gene	gnl.Prokka.assembly_1[-]1861204-1861935	9618	2648.55	2816.32	8197	3271.72	3549.38	6775	3082.33	3272.93
assembly_01818_gene	gnl.Prokka.assembly_1[+]1675265-1676479	2388	396.18	421.28	1260	302.99	328.7	1028	281.78	299.2
assembly_01130_gene	gnl.Prokka.assembly_1[-]1056468-1057748	604	95.04	101.06	574	130.92	142.03	389	101.13	107.38
assembly_01896_gene	gnl.Prokka.assembly_1[-]1740770-1741354	173	59.61	63.39	102	50.95	55.27	102	58.07	61.66
assembly_02186_gene	gnl.Prokka.assembly_2[-]91178-91339	0	0	0	0	0	0	1	2.05	2.18
assembly_00577_gene	gnl.Prokka.assembly_1[+]523989-525029	2291	443.62	471.72	2407	675.55	732.88	2475	791.78	840.74
assembly_00127_gene	gnl.Prokka.assembly_1[-]119514-120464	3652	774.08	823.11	3301	1014.13	1100.2	1967	688.82	731.41
assembly_01795_gene	gnl.Prokka.assembly_1[-]1655284-1655673	103	53.24	56.61	49	36.7	39.82	44	37.58	39.9
assembly_00317_gene	gnl.Prokka.assembly_1[-]287740-289188	4235	589.14	626.46	1777	358.3	388.71	1539	353.72	375.59
assembly_01122_gene	gnl.Prokka.assembly_1[+]1047352-1048389	1140	221.38	235.4	614	172.82	187.49	486	155.93	165.57
assembly_01723_gene	gnl.Prokka.assembly_1[+]1606084-1606857	47	12.24	13.02	51	19.26	20.89	37	15.92	16.9
assembly_00916_gene	gnl.Prokka.assembly_1[-]853688-853966	109	78.75	83.74	64	67.02	72.71	53	63.27	67.18
assembly_01418_gene	gnl.Prokka.assembly_1[-]1340090-1341088	1301	262.51	279.14	489	143.01	155.15	477	159.02	168.85
assembly_01429_gene	gnl.Prokka.assembly_1[+]1348655-1349338	631	185.95	197.73	274	117.04	126.97	273	132.92	141.14
assembly_01569_gene	gnl.Prokka.assembly_1[+]1473921-1475897	6407	653.25	694.63	13253	1958.57	2124.79	12430	2093.84	2223.32
assembly_00889_gene	gnl.Prokka.assembly_1[-]826003-827676	732	88.15	93.73	278	48.52	52.64	275	54.71	58.09
assembly_02359_gene	gnl.Prokka.assembly_2[-]227608-227835	46	40.66	43.24	47	60.23	65.34	42	61.35	65.14
assembly_00817_gene	gnl.Prokka.assembly_1[-]758096-758755	7233	2209.07	2349	3992	1767.18	1917.15	4708	2375.6	2522.5
assembly_00550_gene	gnl.Prokka.assembly_1[+]498105-498440	833	499.73	531.39	466	405.21	439.6	411	407.36	432.55
assembly_00559_gene	gnl.Prokka.assembly_1[-]507633-508394	13490	3568.54	3794.59	6201	2377.6	2579.38	11722	5123.03	5439.82
assembly_00115_gene	gnl.Prokka.assembly_1[+]107006-108637	8078	997.74	1060.94	12769	2285.96	2479.96	8941	1824.51	1937.33
assembly_01617_gene	gnl.Prokka.assembly_1[-]1513731-1515317	533	67.7	71.99	324	59.65	64.71	284	59.59	63.28
assembly_01456_gene	gnl.Prokka.assembly_1[+]1373346-1373723	66	35.19	37.42	49	37.88	41.09	29	25.55	27.13
assembly_00838_gene	gnl.Prokka.assembly_1[-]776754-777755	2685	540.14	574.36	1071	312.29	338.79	869	288.82	306.68
assembly_01793_gene	gnl.Prokka.assembly_1[+]1653936-1654727	72	18.33	19.49	40	14.76	16.01	36	15.13	16.07
assembly_02053_gene	gnl.Prokka.assembly_1[-]1885877-1886671	1757	445.49	473.71	1561	573.67	622.36	1223	512.32	544
assembly_02142_gene	gnl.Prokka.assembly_2[+]57252-57428	469	534.12	567.95	353	582.69	632.14	264	496.72	527.43
assembly_01861_gene	gnl.Prokka.assembly_1[-]1713903-1714724	1061	260.18	276.66	585	207.93	225.58	557	225.67	239.62
assembly_01757_gene	gnl.Prokka.assembly_1[-]1631839-1632255	876	423.45	450.27	1957	1371.15	1487.52	971	775.47	823.42
assembly_00130_gene	gnl.Prokka.assembly_1[+]122541-123926	425	61.81	65.73	401	84.53	91.7	311	74.73	79.35
assembly_01513_gene	gnl.Prokka.assembly_1[+]1421246-1421890	1310	409.4	435.33	696	315.27	342.03	761	392.92	417.22
assembly_01933_gene	gnl.Prokka.assembly_1[+]1778363-1779694	1128	170.71	181.52	2817	617.89	670.33	2441	610.3	648.04
assembly_00446_gene	gnl.Prokka.assembly_1[+]409936-410787	314	74.28	78.99	266	91.22	98.96	197	77	81.76
assembly_02398_gene	gnl.Prokka.assembly_2[+]244203-244607	503	250.35	266.21	286	206.32	223.83	296	243.4	258.45
assembly_00786_gene	gnl.Prokka.assembly_1[+]726073-726639	373	132.6	141	203	104.6	113.48	135	79.3	84.2
assembly_00884_gene	gnl.Prokka.assembly_1[-]820861-821223	82	45.54	48.42	27	21.74	23.58	23	21.1	22.41
assembly_01350_gene	gnl.Prokka.assembly_1[+]1268431-1269105	2323	693.72	737.66	1640	709.86	770.1	1586	782.49	830.88
assembly_01825_gene	gnl.Prokka.assembly_1[-]1680431-1680982	1093	399.13	424.41	900	476.36	516.79	808	487.48	517.62
assembly_01272_gene	gnl.Prokka.assembly_1[-]1191188-1191787	880	295.64	314.37	477	232.28	251.99	398	220.91	234.57
assembly_00245_gene	gnl.Prokka.assembly_1[+]223365-223793	3111	1461.76	1554.36	1549	1054.94	1144.47	1177	913.69	970.19
assembly_02242_gene	gnl.Prokka.assembly_2[+]116128-116529	23	11.53	12.26	21	15.26	16.56	9	7.46	7.92
assembly_01842_gene	gnl.Prokka.assembly_1[+]1693846-1694931	3567	662.07	704.01	2545	684.68	742.79	2076	636.61	675.98
assembly_00393_gene	gnl.Prokka.assembly_1[+]359968-360639	496	148.79	158.21	240	104.34	113.2	192	95.15	101.03
assembly_00913_gene	gnl.Prokka.assembly_1[-]849968-851023	46	8.78	9.34	21	5.81	6.3	18	5.68	6.03
assembly_00879_gene	gnl.Prokka.assembly_1[+]815175-815969	1582	401.12	426.53	1233	453.13	491.59	1232	516.09	548
assembly_01417_gene	gnl.Prokka.assembly_1[-]1339241-1340083	1587	379.47	403.51	665	230.48	250.04	563	222.42	236.17
assembly_02017_gene	gnl.Prokka.assembly_1[+]1854633-1854854	3	2.73	2.9	4	5.26	5.71	3	4.5	4.78
assembly_00848_gene	gnl.Prokka.assembly_1[-]788232-789140	653	144.81	153.98	616	198	214.8	509	186.48	198.01
assembly_01328_gene	gnl.Prokka.assembly_1[+]1243964-1246573	3448	266.29	283.16	1367	153.02	166.01	1337	170.6	181.15
assembly_01572_gene	gnl.Prokka.assembly_1[+]1479187-1479804	3161	1031.03	1096.34	1579	746.5	809.85	1599	861.67	914.95
assembly_01698_gene	gnl.Prokka.assembly_1[+]1582451-1583386	600	129.21	137.4	612	191.03	207.24	474	168.65	179.08
assembly_00553_gene	gnl.Prokka.assembly_1[+]501072-502802	5141	598.67	636.59	2816	475.3	515.64	2404	462.51	491.11
assembly_01833_gene	gnl.Prokka.assembly_1[-]1686531-1687010	354	148.66	158.08	447	272.08	295.17	311	215.78	229.12
assembly_00122_gene	gnl.Prokka.assembly_1[-]114333-115364	511	99.81	106.13	273	77.29	83.85	234	75.51	80.18
assembly_00436_gene	gnl.Prokka.assembly_1[-]400308-400724	775	374.63	398.36	365	255.74	277.44	341	272.33	289.17
assembly_00351_gene	gnl.Prokka.assembly_1[-]322520-323308	658	168.1	178.75	337	124.79	135.38	306	129.16	137.15
assembly_01791_gene	gnl.Prokka.assembly_1[-]1651435-1652859	409	57.86	61.52	251	51.46	55.83	189	44.17	46.9
assembly_01778_gene	gnl.Prokka.assembly_1[+]1644340-1644816	442	186.78	198.61	297	181.91	197.35	254	177.33	188.3
assembly_00549_gene	gnl.Prokka.assembly_1[-]497214-497906	254	73.88	78.56	217	91.49	99.25	171	82.18	87.26
assembly_00586_gene	gnl.Prokka.assembly_1[+]533292-533603	61	39.41	41.91	86	80.54	87.37	83	88.59	94.07
assembly_00806_gene	gnl.Prokka.assembly_1[-]748650-749624	1618	334.51	355.7	508	152.23	165.15	525	179.32	190.41
assembly_00278_gene	gnl.Prokka.assembly_1[-]249322-249510	1177	1255.3	1334.82	754	1165.58	1264.5	830	1462.5	1552.94
assembly_01135_gene	gnl.Prokka.assembly_1[+]1063113-1063967	742	174.93	186.01	455	155.48	168.68	393	153.07	162.54
assembly_01859_gene	gnl.Prokka.assembly_1[-]1711765-1712682	3537	776.65	825.85	2797	890.19	965.74	2487	902.22	958.01
assembly_01928_gene	gnl.Prokka.assembly_1[-]1772795-1773478	3507	1033.5	1098.97	1501	641.15	695.56	1474	717.66	762.04
assembly_01254_gene	gnl.Prokka.assembly_1[-]1177118-1178224	886	161.33	171.55	467	123.25	133.71	485	145.91	154.93
assembly_02370_gene	gnl.Prokka.assembly_2[+]237369-238316	103	21.9	23.29	55	16.95	18.39	50	17.56	18.65
assembly_00885_gene	gnl.Prokka.assembly_1[-]821195-823696	589	47.45	50.46	151	17.63	19.13	155	20.63	21.91
assembly_00743_gene	gnl.Prokka.assembly_1[-]685981-687177	582	98.01	104.22	279	68.1	73.88	228	63.44	67.36
assembly_00501_gene	gnl.Prokka.assembly_1[-]455670-456677	2177	435.34	462.92	1503	435.64	472.61	1463	483.35	513.24
assembly_00982_gene	gnl.Prokka.assembly_1[-]913339-914451	1812	328.17	348.96	870	228.38	247.76	931	278.57	295.8
assembly_01139_gene	gnl.Prokka.assembly_1[-]1066881-1067096	330	307.96	327.47	197	266.47	289.08	202	311.44	330.7
assembly_01170_gene	gnl.Prokka.assembly_1[-]1094933-1095955	527	103.84	110.42	278	79.39	86.13	250	81.39	86.42
assembly_01319_gene	gnl.Prokka.assembly_1[+]1232975-1234858	681	72.86	77.48	215	33.34	36.17	214	37.83	40.17
assembly_01672_gene	gnl.Prokka.assembly_1[-]1563127-1563777	766	237.19	252.21	340	152.59	165.54	266	136.08	144.49
assembly_00141_gene	gnl.Prokka.assembly_1[+]128313-128495	232	255.54	271.73	227	362.41	393.17	148	269.34	285.99
assembly_02094_gene	gnl.Prokka.assembly_2[-]16197-16973	613	159.03	169.1	371	139.5	151.34	293	125.58	133.35
assembly_02302_gene	gnl.Prokka.assembly_2[+]175927-177198	351	55.63	59.15	193	44.33	48.09	83	21.73	23.07
assembly_00492_gene	gnl.Prokka.assembly_1[+]449959-451242	1494	234.54	249.4	754	171.57	186.13	666	172.74	183.42
assembly_02154_gene	gnl.Prokka.assembly_2[-]65729-66184	73	32.27	34.31	31	19.86	21.55	30	21.91	23.26
assembly_00969_gene	gnl.Prokka.assembly_1[-]903140-904294	1085	189.36	201.35	681	172.26	186.88	502	144.75	153.7
assembly_01197_gene	gnl.Prokka.assembly_1[+]1119059-1119550	2901	1188.55	1263.84	1404	833.74	904.5	1700	1150.7	1221.86
assembly_00358_gene	gnl.Prokka.assembly_1[+]328886-329551	487	147.39	156.73	300	131.61	142.78	270	135.01	143.36
assembly_00847_gene	gnl.Prokka.assembly_1[-]786955-788235	628	98.82	105.08	523	119.29	129.41	437	113.61	120.63
assembly_01179_gene	gnl.Prokka.assembly_1[-]1104951-1105883	1150	248.45	264.19	615	192.59	208.93	556	198.46	210.73
assembly_00413_gene	gnl.Prokka.assembly_1[+]378010-378660	2051	635.06	675.29	1167	523.75	568.2	752	384.69	408.48
assembly_00386_gene	gnl.Prokka.assembly_1[-]351854-352327	72	30.62	32.56	43	26.5	28.75	37	25.99	27.6
assembly_01440_gene	gnl.Prokka.assembly_1[+]1358600-1359358	1063	282.31	300.19	798	307.18	333.25	631	276.87	293.99
assembly_00353_gene	gnl.Prokka.assembly_1[+]323620-324600	392	80.55	85.65	204	60.75	65.91	149	50.58	53.71
assembly_01750_gene	gnl.Prokka.assembly_1[-]1627952-1628506	1306	474.33	504.38	2993	1575.6	1709.32	1731	1038.69	1102.92
assembly_02299_gene	gnl.Prokka.assembly_2[-]173435-174352	119	26.13	27.79	128	40.74	44.2	65	23.58	25.04
assembly_00948_gene	gnl.Prokka.assembly_1[-]877968-879161	700	118.17	125.66	352	86.13	93.44	243	67.78	71.97
assembly_00440_gene	gnl.Prokka.assembly_1[-]402775-404631	5194	563.8	599.51	3196	502.84	545.51	3071	550.74	584.8
assembly_02204_gene	gnl.Prokka.assembly_2[+]103387-104181	316	80.12	85.2	110	40.43	43.86	96	40.21	42.7
assembly_01202_gene	gnl.Prokka.assembly_1[+]1122694-1123164	809	346.23	368.16	1411	875.26	949.54	1222	864.03	917.46
assembly_00154_gene	gnl.Prokka.assembly_1[+]136259-136618	851	476.5	506.68	388	314.9	341.62	340	314.53	333.98
assembly_00306_gene	gnl.Prokka.assembly_1[+]279849-281381	13042	1714.89	1823.52	5030	958.64	1040	3962	860.7	913.92
assembly_00211_gene	gnl.Prokka.assembly_1[-]188708-189010	77	51.23	54.47	102	98.35	106.7	98	107.71	114.37
assembly_02128_gene	gnl.Prokka.assembly_2[-]48455-49450	1	0.21	0.22	7	2.06	2.23	4	1.34	1.42
assembly_00758_gene	gnl.Prokka.assembly_1[+]699589-702168	717	56.02	59.57	326	36.92	40.05	344	44.4	47.15
assembly_01645_gene	gnl.Prokka.assembly_1[-]1537160-1537783	288	93.04	98.93	106	49.63	53.84	110	58.71	62.34
assembly_00380_gene	gnl.Prokka.assembly_1[+]345998-346693	543	157.26	167.22	343	143.98	156.2	312	149.29	158.52
assembly_02085_gene	gnl.Prokka.assembly_2[-]6905-7315	18	8.83	9.39	8	5.69	6.17	13	10.54	11.19
assembly_01401_gene	gnl.Prokka.assembly_1[+]1322739-1323518	1964	507.55	539.7	3079	1153.31	1251.19	2117	903.87	959.76
assembly_01566_gene	gnl.Prokka.assembly_1[+]1472060-1472470	620	304.08	323.34	257	182.7	198.2	252	204.19	216.82
assembly_01316_gene	gnl.Prokka.assembly_1[+]1227959-1228345	159	82.81	88.06	115	86.82	94.19	118	101.54	107.82
assembly_00685_gene	gnl.Prokka.assembly_1[+]631539-632762	2893	476.43	506.61	2275	543.04	589.13	1806	491.38	521.76
assembly_01799_gene	gnl.Prokka.assembly_1[+]1657957-1660173	5653	513.98	546.54	2622	345.54	374.87	2367	355.56	377.55
assembly_00048_gene	gnl.Prokka.assembly_1[+]44543-44809	370	279.34	297.03	272	297.64	322.9	280	349.24	370.84
assembly_01464_gene	gnl.Prokka.assembly_1[-]1379919-1380239	1773	1113.36	1183.89	2037	1854.03	2011.38	1685	1748.14	1856.24
assembly_00479_gene	gnl.Prokka.assembly_1[-]437752-439044	5848	911.68	969.43	3385	764.88	829.79	2971	765.22	812.54
assembly_00775_gene	gnl.Prokka.assembly_1[-]716516-717409	2417	544.97	579.49	1169	382.04	414.46	1031	384.06	407.81
assembly_00194_gene	gnl.Prokka.assembly_1[+]172821-173432	288	94.86	100.87	145	69.23	75.1	128	69.65	73.96
assembly_01704_gene	gnl.Prokka.assembly_1[-]1587107-1587535	1093	513.57	546.1	1124	765.49	830.46	937	727.38	772.36
assembly_00546_gene	gnl.Prokka.assembly_1[+]495393-496349	104	21.9	23.29	78	23.81	25.83	50	17.4	18.48
assembly_00392_gene	gnl.Prokka.assembly_1[+]359273-359959	456	133.79	142.27	233	99.09	107.5	172	83.37	88.53
assembly_02045_gene	gnl.Prokka.assembly_1[+]1876310-1876777	160	68.91	73.28	77	48.07	52.15	59	41.98	44.58
assembly_00341_gene	gnl.Prokka.assembly_1[+]309165-309401	42	35.72	37.98	9	11.1	12.04	14	19.67	20.89
assembly_00810_gene	gnl.Prokka.assembly_1[+]752681-753709	810	158.67	168.72	2502	710.4	770.69	1198	387.72	411.7
assembly_01258_gene	gnl.Prokka.assembly_1[+]1180617-1181405	826	211.02	224.39	473	175.16	190.02	341	143.93	152.83
assembly_01893_gene	gnl.Prokka.assembly_1[+]1737099-1738319	5841	964.29	1025.37	3566	853.29	925.71	3180	867.35	920.98
assembly_02258_gene	gnl.Prokka.assembly_2[-]136562-137281	727	203.54	216.43	381	154.61	167.73	278	128.59	136.54
assembly_02175_gene	gnl.Prokka.assembly_2[-]82839-83237	204	103.06	109.59	84	61.51	66.73	56	46.74	49.63
assembly_00671_gene	gnl.Prokka.assembly_1[+]622162-624738	6903	539.96	574.16	2914	330.37	358.41	2805	362.49	384.91
assembly_00241_gene	gnl.Prokka.assembly_1[+]219068-220894	10921	1204.91	1281.24	3883	620.95	673.65	4157	757.74	804.6
assembly_01634_gene	gnl.Prokka.assembly_1[+]1527276-1527752	2004	846.87	900.51	1035	633.95	687.75	998	696.77	739.86
assembly_00578_gene	gnl.Prokka.assembly_1[-]525023-526033	2641	526.56	559.92	973	281.19	305.05	813	267.81	284.37
assembly_00043_gene	gnl.Prokka.assembly_1[+]42228-42632	4187	2083.92	2215.93	3516	2536.45	2751.71	2972	2443.85	2594.97
assembly_01172_gene	gnl.Prokka.assembly_1[-]1096839-1097240	87	43.63	46.39	52	37.79	41	49	40.59	43.1
assembly_00264_gene	gnl.Prokka.assembly_1[+]238351-240171	3154	349.12	371.24	2215	355.38	385.54	1938	354.42	376.34
assembly_00623_gene	gnl.Prokka.assembly_1[-]573777-574844	160	30.2	32.11	99	27.08	29.38	48	14.96	15.89
assembly_01475_gene	gnl.Prokka.assembly_1[-]1387728-1388393	2672	808.71	859.94	2249	986.61	1070.34	1676	838.07	889.89
assembly_00851_gene	gnl.Prokka.assembly_1[-]790277-791014	1027	280.51	298.28	633	250.6	271.87	485	218.86	232.39
assembly_01578_gene	gnl.Prokka.assembly_1[-]1484126-1484806	349	103.31	109.85	148	63.49	68.88	154	75.31	79.97
assembly_00590_gene	gnl.Prokka.assembly_1[+]536712-537146	3120	1445.77	1537.35	1725	1158.59	1256.92	1440	1102.44	1170.61
assembly_02021_gene	gnl.Prokka.assembly_1[+]1857890-1858708	2845	700.21	744.57	1365	486.94	528.27	1268	515.61	547.49
assembly_00034_gene	gnl.Prokka.assembly_1[+]34463-34912	25946	11622.3	12358.5	11391	7395.74	8023.39	10944	8099.24	8600.06
assembly_00834_gene	gnl.Prokka.assembly_1[+]772777-773769	613	124.44	132.32	264	77.68	84.27	228	76.46	81.19
assembly_00790_gene	gnl.Prokka.assembly_1[+]730123-731268	155	27.26	28.99	55	14.02	15.21	60	17.43	18.51
assembly_00934_gene	gnl.Prokka.assembly_1[-]865838-867136	3776	585.94	623.06	1841	414.07	449.21	1881	482.24	512.06
assembly_00983_gene	gnl.Prokka.assembly_1[-]914405-915700	232	36.08	38.37	119	26.82	29.1	108	27.75	29.47
assembly_01216_gene	gnl.Prokka.assembly_1[-]1140106-1141833	2899	338.17	359.59	1616	273.23	296.42	1557	300.07	318.63
assembly_01926_gene	gnl.Prokka.assembly_1[-]1771404-1772387	1232	252.37	268.36	444	131.83	143.02	482	163.13	173.22
assembly_00662_gene	gnl.Prokka.assembly_1[-]611906-613426	1186	157.17	167.13	633	121.59	131.91	563	123.27	130.89
assembly_00588_gene	gnl.Prokka.assembly_1[-]534115-535761	3173	388.34	412.94	1806	320.37	347.56	1690	341.72	362.85
assembly_01003_gene	gnl.Prokka.assembly_1[-]930922-931674	26	6.96	7.4	14	5.43	5.89	9	3.98	4.23
assembly_02013_gene	gnl.Prokka.assembly_1[-]1852862-1853581	1173	328.4	349.2	1165	472.74	512.86	985	455.6	483.77
assembly_01882_gene	gnl.Prokka.assembly_1[+]1730953-1731873	564	123.44	131.26	255	80.89	87.76	261	94.37	100.21
assembly_01127_gene	gnl.Prokka.assembly_1[-]1054534-1055118	370	127.49	135.57	242	120.86	131.12	249	141.75	150.52
assembly_00794_gene	gnl.Prokka.assembly_1[-]734757-735503	123	33.19	35.29	98	38.33	41.58	62	27.64	29.35
assembly_01668_gene	gnl.Prokka.assembly_1[-]1560078-1560698	810	262.93	279.58	838	394.26	427.72	527	282.61	300.09
assembly_02097_gene	gnl.Prokka.assembly_2[-]19069-19611	33	12.25	13.03	12	6.45	7	18	11.04	11.72
assembly_00259_gene	gnl.Prokka.assembly_1[+]234400-235062	1739	528.71	562.2	1042	459.18	498.15	1166	585.68	621.9
assembly_01236_gene	gnl.Prokka.assembly_1[-]1157133-1159721	5938	462.31	491.6	3280	370.15	401.56	3296	423.97	450.19
assembly_02244_gene	gnl.Prokka.assembly_2[+]117445-118698	924	148.53	157.94	272	63.37	68.75	283	75.15	79.8
assembly_00788_gene	gnl.Prokka.assembly_1[+]727905-728702	4442	1122.04	1193.12	1917	701.86	761.43	1974	823.81	874.75
assembly_01444_gene	gnl.Prokka.assembly_1[+]1360664-1361863	5873	986.54	1049.03	3063	745.76	809.05	2775	770.13	817.75
assembly_00539_gene	gnl.Prokka.assembly_1[+]489059-489754	80	23.17	24.64	59	24.77	26.87	80	38.28	40.65
assembly_00985_gene	gnl.Prokka.assembly_1[-]916281-916784	196	78.39	83.36	133	77.1	83.64	92	60.79	64.55
assembly_00385_gene	gnl.Prokka.assembly_1[-]351635-351844	177	169.9	180.66	84	116.87	126.79	84	133.21	141.45
assembly_00044_gene	gnl.Prokka.assembly_1[-]42619-43092	404	171.81	182.69	309	190.47	206.63	266	186.89	198.45
assembly_00617_gene	gnl.Prokka.assembly_1[-]568692-569327	811	257.04	273.32	462	212.24	230.25	452	236.68	251.32
assembly_01430_gene	gnl.Prokka.assembly_1[+]1349339-1350592	1408	226.33	240.67	570	132.8	144.07	519	137.84	146.36
assembly_01285_gene	gnl.Prokka.assembly_1[+]1203259-1203729	30	12.84	13.65	18	11.16	12.11	12	8.49	9.01
assembly_01884_gene	gnl.Prokka.assembly_1[-]1732209-1732682	506	215.18	228.81	341	210.19	228.03	280	196.73	208.89
assembly_02062_gene	gnl.Prokka.assembly_1[-]1893001-1894794	6645	746.63	793.93	3112	506.82	549.83	2743	509.19	540.68
assembly_00825_gene	gnl.Prokka.assembly_1[-]765032-765745	342	96.55	102.67	672	274.98	298.32	423	197.3	209.5
assembly_02249_gene	gnl.Prokka.assembly_2[-]126472-129087	417	32.13	34.17	136	15.19	16.48	151	19.22	20.41
assembly_02167_gene	gnl.Prokka.assembly_2[-]77095-77409	21	13.44	14.29	30	27.83	30.19	17	17.97	19.08
assembly_00987_gene	gnl.Prokka.assembly_1[+]916988-917503	218	85.17	90.56	207	117.2	127.15	155	100.03	106.22
assembly_00389_gene	gnl.Prokka.assembly_1[-]355506-355862	280	158.1	168.11	161	131.76	142.94	129	120.34	127.78
assembly_00200_gene	gnl.Prokka.assembly_1[-]178529-179368	311	74.63	79.36	209	72.69	78.86	216	85.63	90.93
assembly_01359_gene	gnl.Prokka.assembly_1[-]1279754-1280152	237	119.74	127.32	178	130.34	141.4	172	143.56	152.44
assembly_01592_gene	gnl.Prokka.assembly_1[-]1495309-1496316	2523	504.53	536.49	1065	308.69	334.89	857	283.14	300.65
assembly_00327_gene	gnl.Prokka.assembly_1[-]299000-301351	12264	1051.06	1117.64	11201	1391.4	1509.48	9319	1319.51	1401.1
assembly_00547_gene	gnl.Prokka.assembly_1[+]496353-496655	49	32.6	34.66	37	35.68	38.71	39	42.87	45.52
assembly_00313_gene	gnl.Prokka.assembly_1[+]285407-285724	500	316.94	337.02	367	337.18	365.8	307	321.51	341.39
assembly_00756_gene	gnl.Prokka.assembly_1[-]697032-698510	42	5.73	6.09	25	4.94	5.36	19	4.28	4.54
assembly_01977_gene	gnl.Prokka.assembly_1[+]1820294-1821172	243	55.73	59.26	223	74.12	80.41	160	60.62	64.37
assembly_02159_gene	gnl.Prokka.assembly_2[-]69189-70352	24	4.16	4.42	21	5.27	5.72	21	6.01	6.38
assembly_01579_gene	gnl.Prokka.assembly_1[-]1484778-1485143	504	277.58	295.16	266	212.34	230.36	248	225.66	239.61
assembly_01720_gene	gnl.Prokka.assembly_1[+]1601684-1603570	7733	826.05	878.38	4903	759.14	823.57	4009	707.53	751.28
assembly_00481_gene	gnl.Prokka.assembly_1[-]439294-439785	4503	1844.9	1961.76	3296	1957.28	2123.39	2734	1850.61	1965.04
assembly_00452_gene	gnl.Prokka.assembly_1[-]415461-416198	1571	429.1	456.28	874	346.01	375.37	796	359.2	381.41
assembly_01843_gene	gnl.Prokka.assembly_1[+]1694946-1696541	1654	208.9	222.13	678	124.12	134.65	594	123.95	131.61
assembly_00576_gene	gnl.Prokka.assembly_1[-]522775-523950	8650	1482.66	1576.58	5163	1282.7	1391.56	5059	1432.64	1521.23
assembly_01994_gene	gnl.Prokka.assembly_1[-]1839299-1840144	2278	542.77	577.15	1655	571.55	620.06	1490	586.54	622.81
assembly_01013_gene	gnl.Prokka.assembly_1[-]939031-939873	553	132.23	140.61	339	117.49	127.46	278	109.83	116.62
assembly_01467_gene	gnl.Prokka.assembly_1[-]1382049-1382603	1120	406.78	432.55	471	247.95	268.99	476	285.63	303.29
assembly_01178_gene	gnl.Prokka.assembly_1[+]1104103-1104954	252	59.62	63.4	154	52.81	57.29	119	46.51	49.39
assembly_00110_gene	gnl.Prokka.assembly_1[-]100405-101994	13808	1750.52	1861.41	7409	1361.43	1476.97	9105	1907.06	2024.98
assembly_00407_gene	gnl.Prokka.assembly_1[-]371912-373009	7	1.29	1.37	1	0.27	0.29	2	0.6	0.64
assembly_00079_gene	gnl.Prokka.assembly_1[+]71596-72105	2257	892.06	948.57	1101	630.74	684.27	920	600.75	637.9
assembly_01056_gene	gnl.Prokka.assembly_1[+]985269-985724	72	31.82	33.84	22	14.09	15.29	26	18.99	20.16
assembly_00795_gene	gnl.Prokka.assembly_1[-]735500-738799	1281	78.24	83.2	1245	110.23	119.58	881	88.91	94.41
assembly_01674_gene	gnl.Prokka.assembly_1[-]1565732-1566487	1349	359.69	382.47	771	297.96	323.25	652	287.21	304.97
assembly_01269_gene	gnl.Prokka.assembly_1[-]1189048-1189953	564	125.48	133.43	201	64.82	70.32	215	79.03	83.92
assembly_00071_gene	gnl.Prokka.assembly_1[-]60294-62669	14697	1246.86	1325.84	22925	2819	3058.24	19396	2718.6	2886.71
assembly_00681_gene	gnl.Prokka.assembly_1[-]629028-629411	1557	817.32	869.09	897	682.49	740.41	846	733.7	779.07
assembly_00814_gene	gnl.Prokka.assembly_1[+]755646-755921	272	198.66	211.24	172	182.08	197.53	153	184.61	196.03
assembly_00288_gene	gnl.Prokka.assembly_1[+]260465-261598	1734	308.23	327.75	924	238.07	258.27	788	231.42	245.73
assembly_00978_gene	gnl.Prokka.assembly_1[+]910285-912519	7884	711.06	756.1	3587	468.91	508.7	3092	460.73	489.22
assembly_01864_gene	gnl.Prokka.assembly_1[-]1715439-1716536	1704	312.82	332.64	883	234.96	254.9	718	217.77	231.24
assembly_00296_gene	gnl.Prokka.assembly_1[+]269912-270106	199	205.71	218.74	107	160.31	173.92	89	152	161.4
assembly_01715_gene	gnl.Prokka.assembly_1[-]1597856-1598236	2511	1328.48	1412.63	1501	1151.04	1248.72	1302	1138.07	1208.44
assembly_01927_gene	gnl.Prokka.assembly_1[-]1772407-1772814	394	194.66	206.99	185	132.48	143.72	170	138.76	147.34
assembly_00951_gene	gnl.Prokka.assembly_1[-]880970-882181	1542	256.45	272.7	1337	322.3	349.65	989	271.76	288.56
assembly_00454_gene	gnl.Prokka.assembly_1[-]417108-418076	2243	466.59	496.15	1515	456.79	495.56	1182	406.23	431.35
assembly_01492_gene	gnl.Prokka.assembly_1[+]1400525-1401553	189	37.02	39.37	103	29.25	31.73	91	29.45	31.27
assembly_01305_gene	gnl.Prokka.assembly_1[-]1219526-1219912	659	343.25	364.99	343	258.95	280.93	284	244.39	259.5
assembly_01679_gene	gnl.Prokka.assembly_1[+]1570790-1571374	1753	604.03	642.29	1044	521.41	565.66	942	536.26	569.42
assembly_01960_gene	gnl.Prokka.assembly_1[+]1807258-1807458	292	292.83	311.38	264	383.74	416.31	228	377.76	401.12
assembly_01737_gene	gnl.Prokka.assembly_1[-]1619876-1620646	4048	1058.33	1125.37	1734	657.09	712.86	1284	554.61	588.91
[truncated: 229 more rows]

## Sheet: cas gene_expressions
Gene name	ID	WT-count	WT-TPM	WT-FPKM
rpoB	01910	14005, 9793, 8009	840, 851, 793	893, 923,842
gyrB	01665	14784, 10685, 11015	1564, 1638, 1925	1663, 1777, 2044
eno	00003	3353, 4835, 3691	532, 1113, 968	566, 1207, 1028
I-B_Cas6-1	02204	316, 110, 96	80, 40, 40	85, 43, 42	I-B
I-B_Cas3	02203	904, 400, 283	74, 47, 38	78, 51, 40
I-B_Cas5	02202	413, 133, 134	105, 49, 56	112, 53, 60
I-B_Cas7	02201	537, 217, 146	122, 72, 55	130, 78, 58
I-B_Cas8	02200	718, 177, 180	63, 22, 26	67, 24, 27
cas6-2	00342	49, 27, 27	13, 10, 12	14, 12, 13
csm1	02397	2318, 1071, 1169	193, 129, 161	205, 140, 170	III-A
csm2	02398	503, 206, 243	250, 206, 243	266, 223, 258
csm3	02399	623, 396, 430	173, 159, 197	184, 173, 209
csm4	02400	680, 392, 298	156, 130, 113	166, 141, 120
csm5	02401	983, 688, 578	171, 174, 166	182, 188, 177
csm6	-	-	-	-
cmr1	-	-	-	-
cmr2	02086	449, 261, 217	52, 43, 41	55, 47, 44	III-B
cmr3	02087	322, 162, 136	60, 44, 42	64, 47, 44
cmr4	02089	450, 176, 133	105, 60, 51	112, 65, 55
cmr5	02090	107, 56, 38	63, 47, 37	66, 51, 38
cmr6	02091	485, 276, 213	93, 77, 68	99, 84, 71
csx1	02081	273, 94, 92	29, 14, 16	31, 16, 17
cas3	02110	374, 196, 192	34, 26, 29	36, 28, 31	I-C
cas5	02111	172, 97, 75	50, 41, 36	53, 44, 38
cas8	02112	432, 279, 230	49, 46, 43	52, 50, 46
cas7	02113	786, 404, 282	137, 102, 81	146, 111, 86
cas4	02114	78, 37, 33	45, 31, 31	48, 33, 33
